# Supplementary material for: Choosing an Optimal Sample Preparation in Caulobacter crescentus for Untargeted Metabolomics Approaches
Source: MDPI journal article supplement (doi:10.3390/metabo9100193), 2019-09-20
Supplement: s1 [file s1]

| Sample               | Cells retrieval | Solvent | Cells disruption | tp1     | tp2     | tp3     | to      |
|----------------------|-----------------|---------|------------------|---------|---------|---------|---------|
| Centri CHCl3 Beads 1 | Centri          | CHCl3   | Beads            | 0.1882  | 0.1680  | 0.1110  | 0.3427  |
| Centri CHCl3 Beads 2 | Centri          | CHCl3   | Beads            | 0.1376  | 0.1187  | 0.1098  | -0.2191 |
| Centri CHCl3 Beads 3 | Centri          | CHCl3   | Beads            | 0.1891  | 0.1025  | 0.1443  | 0.1305  |
| Centri MeOH Beads 1  | Centri          | MeOH    | Beads            | 0.1571  | -0.1258 | 0.1246  | 0.3493  |
| Centri MeOH Beads 2  | Centri          | MeOH    | Beads            | 0.1316  | -0.0673 | 0.0849  | -0.2208 |
| Centri MeOH Beads 3  | Centri          | MeOH    | Beads            | 0.1554  | -0.1044 | 0.1322  | -0.1348 |
| Filter CHCl3 Beads 1 | Filter          | CHCl3   | Beads            | -0.1627 | 0.1255  | 0.1250  | 0.2298  |
| Filter CHCl3 Beads 2 | Filter          | CHCl3   | Beads            | -0.1553 | 0.0803  | 0.0654  | -0.0234 |
| Filter CHCl3 Beads 3 | Filter          | CHCl3   | Beads            | -0.1291 | 0.0326  | 0.1533  | -0.1489 |
| Filter MeOH Beads 1  | Filter          | MeOH    | Beads            | -0.1118 | -0.0410 | 0.0864  | -0.2506 |
| Filter MeOH Beads 2  | Filter          | MeOH    | Beads            | -0.2196 | -0.1346 | 0.1119  | 0.0471  |
| Filter MeOH Beads 3  | Filter          | MeOH    | Beads            | -0.1805 | -0.1544 | 0.1917  | -0.1019 |
| Centri CHCl3 F_T 1   | Centri          | CHCl3   | F/T              | 0.1788  | 0.1435  | -0.1053 | -0.3074 |
| Centri CHCl3 F_T 2   | Centri          | CHCl3   | F/T              | 0.1770  | 0.1481  | -0.1292 | -0.3619 |
| Centri CHCl3 F_T 3   | Centri          | CHCl3   | F/T              | 0.1863  | 0.1276  | -0.1222 | 0.0423  |
| Centri MeOH F_T 1    | Centri          | MeOH    | F/T              | 0.2445  | -0.1732 | -0.1405 | 0.1868  |
| Centri MeOH F_T 2    | Centri          | MeOH    | F/T              | 0.2659  | -0.2444 | -0.1330 | 0.1938  |
| Centri MeOH F_T 3    | Centri          | MeOH    | F/T              | 0.1917  | -0.0932 | -0.0766 | -0.0015 |
| Filter CHCl3 F_T 1   | Filter          | CHCl3   | F/T              | -0.2301 | 0.2753  | -0.1486 | 0.3471  |
| Filter CHCl3 F_T 2   | Filter          | CHCl3   | F/T              | -0.1805 | 0.1325  | -0.1223 | -0.0662 |
| Filter CHCl3 F_T 3   | Filter          | CHCl3   | F/T              | -0.1993 | 0.1201  | -0.0812 | 0.0343  |
| Filter MeOH F_T 1    | Filter          | MeOH    | F/T              | -0.1822 | -0.1463 | -0.1706 | -0.1911 |
| Filter MeOH F_T 2    | Filter          | MeOH    | F/T              | -0.2530 | -0.1514 | -0.1342 | 0.1238  |
| Filter MeOH F_T 3    | Filter          | MeOH    | F/T              | -0.1991 | -0.1386 | -0.0769 | -0.0001 |
