# Supplementary material for: Choosing an Optimal Sample Preparation in Caulobacter crescentus for Untargeted Metabolomics Approaches
Source: MDPI journal article supplement (doi:10.3390/metabo9100193), 2019-09-20
Supplement: s1 [file s1]

| Compound         | Adapted Name          | Cells retrieval VIP <sup>2</sup> | Solvent VIP <sup>2</sup> | Cells disruption VIP <sup>2</sup> | Residuals VIP <sup>2</sup> |
|------------------|-----------------------|----------------------------------|--------------------------|-----------------------------------|----------------------------|
| 7.80_161.0450m/z | 3-H-3-Methylglutarate | 3.46868525                       | 0.01176429               | 0.09224117                        | 0.01341271                 |
| 8.20_163.0606m/z | 2-Deoxy-Glucose       | 3.46362326                       | 0.00000289               | 0.05417190                        | 0.00003147                 |
| 8.57_180.0630m/z | Glucose               | 3.42566462                       | 0.01145761               | 0.24651233                        | 0.11389171                 |
| 7.65_128.0346m/z | N-A-L-Serine          | 3.25602784                       | 0.17235607               | 0.13661398                        | 0.00183962                 |
| 1.56_482.2943m/z | Tlcholic Acid         | 3.01713783                       | 0.04734984               | 0.57872987                        | 0.13098568                 |
| 8.25_299.0998m/z | Xylose                | 2.83096290                       | 0.15783802               | 0.18433974                        | 0.14535641                 |
| 8.16_242.0778m/z | Cytidine              | 2.80868490                       | 0.32064218               | 0.29147040                        | 0.20864985                 |
| 5.72_465.3091m/z | Gcholic Acid          | 2.71964561                       | 0.00545484               | 0.29419280                        | 1.03150733                 |
| 8.27_180.0665m/z | Tyrosine              | 2.53521879                       | 0.00667159               | 0.25269603                        | 1.37069629                 |
| 6.88_193.0727m/z | M-B-Galactoside       | 2.50329388                       | 0.71181877               | 0.03345336                        | 1.19994891                 |
| 8.48_165.0395m/z | Galactaric Acid       | 2.46687955                       | 0.00813805               | 0.14675500                        | 0.00000408                 |
| 8.25_330.0604m/z | DAMP                  | 2.46546475                       | 0.59181513               | 0.00032268                        | 0.86058630                 |
| 8.21_321.0492m/z | dTMP                  | 2.46059535                       | 0.57820935               | 0.00038940                        | 1.30332678                 |
| 8.45_167.0210m/z | Uric Acid             | 2.44693330                       | 0.45644525               | 0.18421922                        | 1.39783043                 |
| 7.49_150.0415m/z | Guanine               | 2.44260884                       | 0.02225635               | 0.47507204                        | 1.23608460                 |
| 5.14_448.3063m/z | Gdeoxycholic Acid     | 2.41421550                       | 0.02490126               | 0.55638494                        | 0.99961043                 |
| 8.56_347.0631m/z | AMP                   | 2.19595820                       | 1.25405292               | 0.29173418                        | 0.68912301                 |
| 9.08_160.0614m/z | Amino adipate         | 2.11489499                       | 1.02450991               | 0.13053063                        | 0.01460610                 |
| 1.28_253.2164m/z | Hexadecanoic Acid     | 1.93067409                       | 0.26606166               | 1.04710530                        | 1.84865760                 |
| 8.67_176.0562m/z | 4-H-Proline           | 1.91664124                       | 0.06908115               | 1.30458967                        | 0.59375977                 |
| 2.28_407.2797m/z | Cholic Acid           | 1.89582348                       | 0.09548776               | 0.03126367                        | 1.07473079                 |
| 1.31_281.2483m/z | Oleic Acid            | 1.86782879                       | 0.18228491               | 1.70044419                        | 0.27663385                 |
| 6.67_151.0262m/z | Xanthine              | 1.86772626                       | 0.01122609               | 0.10819995                        | 2.20205381                 |
| 8.58_383.0600m/z | AICAR                 | 1.86144855                       | 0.01375718               | 2.04269628                        | 0.01106107                 |
| 7.30_130.0872m/z | L-Isoleucine          | 1.74438855                       | 0.38583656               | 0.09664831                        | 1.95162715                 |
| 8.37_290.0877m/z | N-AN Acid             | 1.69476027                       | 0.15218123               | 0.25975874                        | 1.24991897                 |
| 7.01_266.0887m/z | 2'-DG                 | 1.65546365                       | 0.00193781               | 0.52264833                        | 1.88643172                 |
| 6.33_243.0622m/z | Uridine               | 1.57539887                       | 0.09628356               | 0.03456668                        | 2.63257980                 |

|                   |                       |            |            |            |            |
|-------------------|-----------------------|------------|------------|------------|------------|
| 8.24_283.0673m/z  | Xanthosine            | 1.55638633 | 1.28836640 | 0.26857230 | 0.45437956 |
| 5.99_312.0946m/z  | Adenosine             | 1.52791743 | 0.00017638 | 0.02309745 | 1.99851292 |
| 8.47_344.0398m/z  | cGMP                  | 1.52566588 | 0.00376243 | 0.04461547 | 1.06356761 |
| 7.01_267.0731m/z  | Inosine               | 1.46429324 | 0.03546149 | 0.00281861 | 1.36682999 |
| 6.71_162.0418m/z  | Pterin                | 1.40056870 | 1.37977873 | 0.38455643 | 0.29895745 |
| 8.94_766.1078m/z  | CoA                   | 1.39970051 | 0.34976369 | 0.40563862 | 0.54267514 |
| 8.64_202.0717m/z  | N-AG                  | 1.36155201 | 2.34356122 | 0.18980384 | 0.03607112 |
| 11.78_521.9850m/z | GTP                   | 1.34494907 | 1.55392667 | 2.00298331 | 0.06153514 |
| 10.12_149.0088m/z | (R,R)-T Acid          | 1.31242820 | 0.83186698 | 1.51987516 | 1.80364212 |
| 1.56_121.0293m/z  | 4-Hydroxybenzaldehyde | 1.31127242 | 0.05362682 | 0.26962370 | 0.25143546 |
| 8.97_323.0285m/z  | U-5MP                 | 1.20249457 | 0.01435281 | 0.20276636 | 2.21808569 |
| 8.92_195.0506m/z  | Gluconic Acid         | 1.19864438 | 0.00509960 | 2.68140948 | 0.55930942 |
| 10.62_189.0880m/z | 2,6-DH Acid           | 1.14522221 | 0.66518393 | 0.26745513 | 0.12682773 |
| 9.61_259.0217m/z  | Glucose 6-P           | 1.09913520 | 0.04815972 | 1.55761794 | 1.67947604 |
| 8.84_307.0826m/z  | GSH reduced           | 1.08114255 | 2.55136407 | 0.04165907 | 0.85239826 |
| 6.12_218.1031m/z  | Pantothenic Acid      | 1.03615986 | 0.41092397 | 0.49412599 | 3.01934535 |
| 8.48_808.1185m/z  | Acetyl-CoA            | 1.01481412 | 0.15368956 | 3.83806388 | 0.80734075 |
| 7.28_260.0440m/z  | cCMP                  | 0.95037776 | 3.46961957 | 0.04688985 | 0.03673490 |
| 8.65_383.1135m/z  | S-5'-Homocysteine     | 0.94721424 | 3.71277575 | 1.48744034 | 0.52800490 |
| 9.79_225.0987m/z  | Carnosine             | 0.92066342 | 1.48262629 | 0.10475652 | 0.04854229 |
| 2.62_391.2872m/z  | Cdcholic Acid         | 0.86726224 | 0.03445489 | 0.00168464 | 1.24080678 |
| 1.13_227.2020m/z  | Myristic Acid         | 0.78317685 | 0.72516786 | 0.36080622 | 0.02030236 |
| 7.84_282.0840m/z  | Guanosine             | 0.77275588 | 0.11252423 | 0.19619517 | 2.32058016 |
| 9.03_171.0061m/z  | G2-P                  | 0.75585608 | 0.06397708 | 0.28711671 | 2.36860699 |
| 9.91_866.1197m/z  | Succinyl-CoA          | 0.73811359 | 0.69062011 | 0.42239247 | 1.80744609 |
| 9.19_347.0403m/z  | IMP                   | 0.68568865 | 2.12657899 | 0.73259156 | 0.86776066 |
| 11.17_579.0267m/z | UDP Glucuronic Acid   | 0.62581794 | 0.20432928 | 0.77952590 | 1.05994338 |
| 10.07_191.0195m/z | Citric Acid           | 0.60839283 | 0.49059781 | 0.66726329 | 1.70654989 |
| 5.75_156.0661m/z  | N-Acetylproline       | 0.60804443 | 0.00607687 | 0.02672831 | 1.68937034 |

|                   |                   |            |            |            |            |
|-------------------|-------------------|------------|------------|------------|------------|
| 9.78_565.0474m/z  | UDP-Glucose       | 0.60086705 | 0.42658884 | 0.64990332 | 1.60314255 |
| 11.22_481.9749m/z | CTP               | 0.56323980 | 0.24960903 | 4.27117230 | 0.38404867 |
| 10.27_505.9880m/z | ATP               | 0.55997788 | 1.13929533 | 1.71168917 | 1.43230092 |
| 8.98_147.0527m/z  | Glutamic Acid     | 0.55136939 | 1.03146863 | 1.17621460 | 3.07249210 |
| 8.71_237.0613m/z  | Quinic Acid       | 0.53997222 | 0.26793241 | 0.92470503 | 0.30609615 |
| 5.90_134.0472m/z  | Adenine           | 0.50931024 | 0.10624432 | 0.73363623 | 2.59431057 |
| 9.39_214.0480m/z  | G6P               | 0.48911847 | 4.44988783 | 0.00070296 | 0.07784260 |
| 10.57_408.0130m/z | dGTP              | 0.48250751 | 0.02545136 | 0.28237185 | 1.77076627 |
| 2.16_164.0347m/z  | 4-Pyridoxic Acid  | 0.45847901 | 0.35040466 | 0.48099455 | 0.01613514 |
| 5.79_173.0816m/z  | Suberic Acid      | 0.44567289 | 0.00349885 | 1.07550061 | 2.02263481 |
| 8.81_202.0714m/z  | N-A-Galactosamine | 0.43629264 | 0.56918837 | 1.32261559 | 0.02068953 |
| 9.34_131.0459m/z  | L-Asparagine      | 0.41567668 | 5.99473774 | 0.81606554 | 0.07340127 |
| 9.34_322.0443m/z  | 5'-CMP            | 0.37033478 | 5.68299272 | 1.05231686 | 0.87920734 |
| 10.14_341.1074m/z | Lactose           | 0.36536044 | 0.08378960 | 0.01229174 | 2.28456529 |
| 8.85_540.0537m/z  | ADP-Ribose        | 0.34547079 | 0.43052083 | 0.93849662 | 1.83153693 |
| 10.91_505.9879m/z | 2'-DG-5'TP        | 0.33855849 | 1.72853231 | 3.14498056 | 0.84577157 |
| 0.96_347.2240m/z  | EPA               | 0.32930590 | 0.26226562 | 0.80286390 | 1.12762131 |
| 2.17_163.0407m/z  | M-Vanillate       | 0.31751285 | 0.76827743 | 0.79768756 | 1.17651517 |
| 7.98_395.0540m/z  | Rosmarinic Acid   | 0.31610264 | 1.04061524 | 0.26132588 | 0.51706858 |
| 7.60_203.0825m/z  | L-Tryptophan      | 0.30064645 | 0.11849467 | 0.00114710 | 5.47767301 |
| 9.03_187.1084m/z  | A-L-Lysine        | 0.27787065 | 0.81010154 | 0.10820914 | 0.97556693 |
| 8.68_219.0508m/z  | Shikimic Acid     | 0.25926975 | 0.45723802 | 1.14063557 | 0.06650736 |
| 9.43_362.0497m/z  | GMP               | 0.25402276 | 3.19502869 | 0.84911279 | 0.66778232 |
| 8.58_288.1197m/z  | Ophthalmic Acid   | 0.25036399 | 2.82368104 | 2.12855879 | 1.79105130 |
| 9.02_188.0563m/z  | N-A-Glutamic Acid | 0.23231893 | 0.04864106 | 4.11798211 | 1.55862237 |
| 2.40_201.1139m/z  | Sebaic Acid       | 0.22414969 | 0.31603789 | 0.88807270 | 0.36405429 |
| 9.44_606.0738m/z  | U-5'DP-AG         | 0.17121599 | 2.28407865 | 0.71034699 | 1.29952778 |
| 9.13_445.0526m/z  | CDP-Ethanolamine  | 0.16252590 | 0.54367600 | 0.64392157 | 0.44224714 |
| 1.93_405.1906m/z  | Cortisone         | 0.15728966 | 0.51780021 | 0.62317575 | 0.17622907 |

|                   |                |            |            |            |            |
|-------------------|----------------|------------|------------|------------|------------|
| 9.34_377.0850m/z  | Trehalose      | 0.07921810 | 4.09660880 | 2.35142072 | 0.10790298 |
| 10.28_426.0207m/z | ADP            | 0.06811882 | 0.61377224 | 5.06489550 | 0.25649931 |
| 5.88_245.0930m/z  | N-A-Tryptophan | 0.05676709 | 0.21322149 | 0.47871174 | 1.21234963 |
| 9.19_145.0615m/z  | L-Glutamine    | 0.04432390 | 6.19707062 | 0.05472836 | 0.77510155 |
| 11.08_338.9880m/z | F1,5-BP        | 0.03576518 | 2.34834523 | 1.71993763 | 1.26993471 |
| 7.09_164.0717m/z  | Phenylalanine  | 0.03442421 | 0.65623605 | 0.44889659 | 5.61129843 |
| 8.90_342.1161m/z  | Palatinose     | 0.03190293 | 0.12444702 | 1.25362785 | 1.46749422 |
| 10.38_402.0097m/z | CDP            | 0.03091930 | 0.76470466 | 2.77774900 | 0.57477245 |
| 8.90_387.1141m/z  | Sucrose        | 0.02974136 | 0.12652975 | 1.18727142 | 1.61021322 |
| 6.38_135.0313m/z  | Hypoxanthine   | 0.02739844 | 0.00021488 | 0.61266352 | 5.66298107 |
| 10.71_442.0167m/z | GDP            | 0.02482506 | 0.11032960 | 4.01288886 | 0.56563686 |
| 11.12_220.9626m/z | 3-PG Acid      | 0.02170693 | 1.04293926 | 0.00474432 | 0.00021668 |
| 0.73_283.2640m/z  | Stearic Acid   | 0.01173910 | 0.11067049 | 6.04793135 | 0.00000002 |
| 9.47_427.0068m/z  | IDP            | 0.00450126 | 2.95296687 | 1.37812381 | 0.02745668 |
| 9.29_211.0002m/z  | Ribose 5-P     | 0.00317117 | 5.70745543 | 1.09872813 | 0.05531789 |
| 1.67_281.2484m/z  | P Acid         | 0.00274160 | 0.60567748 | 8.25198594 | 0.01104074 |
| 4.15_187.0972m/z  | Azelaic Acid   | 0.00112724 | 0.03832652 | 1.12499989 | 0.53019414 |
| 1.66_255.2323m/z  | Palmitic Acid  | 0.00056337 | 0.38543503 | 8.21721514 | 0.01199068 |
| 9.46_711.2175m/z  | Stachyose      | 0.00023972 | 1.16867480 | 2.75061704 | 0.34787345 |
| 9.13_154.0622m/z  | L-Histidine    | 0.00000299 | 9.70262545 | 0.17003288 | 0.13765816 |
