# Supplementary material for: Choosing an Optimal Sample Preparation in Caulobacter crescentus for Untargeted Metabolomics Approaches
Source: MDPI journal article supplement (doi:10.3390/metabo9100193), 2019-09-20
Supplement: s1 [file s1]

| Name                      | Adapted Name  | Observed Rt (min) | Observed m/z | Observed CCS | Observed adduct(s)        | CAS Identifier | Confirmation Rt | Confirmation MS/MS | Confirmation CCS | MS/MS & CCS | Chemical Class          |
|---------------------------|---------------|-------------------|--------------|--------------|---------------------------|----------------|-----------------|--------------------|------------------|-------------|-------------------------|
| L-Glutamine               | L-Glutamine   | 9.19              | 145.0615     | 130.3        | M-H                       | 56-85-9        | v               | N/A                | v                |             | Amino acids/derivatives |
| Inosine 5'-Phosphate      | IMP           | 9.19              | 347.0403     | 170.3        | M-H                       | 131-99-7       | v               | v                  | v                | v           | Nucleotides/analogs     |
| Citric Acid               | Citric Acid   | 10.07             | 191.0195     | 125.6        | M-H                       | 77-92-9        | v               | N/A                | v                |             | Organic acids           |
| N-Acetylneuraminic Acid   | N-AN Acid     | 8.37              | 290.0877     | 158.6        | M-H <sub>2</sub> O-H      | 131-48-6       | v               | v                  | v                | v           | Organic acids           |
| Uric Acid                 | Uric Acid     | 8.45              | 167.0210     | 123.9        | M-H                       | 69-93-2        | v               | N/A                | v                |             | Organic acids           |
| Cytidine                  | Cytidine      | 8.16              | 242.0778     | 153.8        | M-H                       | 65-46-3        | v               | v                  | v                | v           | Nucleosides/analogs     |
| Inosine                   | Inosine       | 7.01              | 267.0731     | 156.1        | M-H                       | 58-63-9        | v               | v                  | v                | v           | Nucleosides/analogs     |
| L-Isoleucine              | L-Isoleucine  | 7.3               | 130.0872     | 130.1        | M-H                       | 73-32-5        | v               | N/A                | v                |             | Amino acids/derivatives |
| L-Glutamic Acid           | Glutamic Acid | 8.98              | 147.0527     | 123.9        | M-H <sub>2</sub> O-H, M-H | 56-86-0        | v               | v                  | v                | v           | Amino acids/derivatives |
| N-Acetyl-D-Glucosamine    | N-AG          | 8.64              | 202.0717     | 142.6        | M-H <sub>2</sub> O-H      | 7512-17-6      | v               | N/A                | v                |             | Carbohydrates           |
| Gluconic Acid             | Gluconic Acid | 8.92              | 195.0506     | 131.7        | M-H                       | 526-95-4       | v               | v                  | v                | v           | Organic acids           |
| Quinic Acid               | Quinic Acid   | 8.71              | 237.0613     | 145.8        | M+FA-H                    | 77-95-2        | v               | N/A                | v                |             | Organic acids           |
| Adenine                   | Adenine       | 5.9               | 134.0472     | 118.6        | M-H                       | 6055-72-7      | v               | v                  | v                | v           | Nucleosides/analogs     |
| Xanthine                  | Xanthine      | 6.67              | 151.0262     | 120.3        | M-H                       | 69-89-6        | v               | v                  | v                | v           | Nucleosides/analogs     |
| L-Tryptophan              | L-Tryptophan  | 7.6               | 203.0825     | 149.1        | M-H                       | 73-22-3        | v               | v                  | v                | v           | Amino acids/derivatives |
| Uridine 5'-Monophosphate  | U-5MP         | 8.97              | 323.0285     | 160.9        | M-H                       | 58-97-9        | v               | v                  | v                | v           | Nucleotides/analogs     |
| Uridine                   | Uridine       | 6.33              | 243.0622     | 148.8        | M-H                       | 58-96-8        | v               | v                  | v                | v           | Nucleosides/analogs     |
| Fructose 1,5-Biphosphate  | F1,5-BP       | 11.08             | 338.9880     | 152.2        | M-H                       | 488-69-7       | v               | N/A                | v                |             | Phosphates              |
| Carnosine                 | Carnosine     | 9.79              | 225.0987     | 149.6        | M-H                       | 305-84-0       | v               | N/A                | v                |             | Amino acids/derivatives |
| Shikimic Acid             | Shikimic Acid | 8.68              | 219.0508     | 141.7        | M+FA-H                    | 138-59-0       | v               | N/A                | v                |             | Organic acids           |
| L-Phenylalanine           | Phenylalanine | 7.09              | 164.0717     | 138.5        | M-H                       | 63-91-2        | v               | v                  | v                | v           | Amino acids/derivatives |
| Hypoxanthine              | Hypoxanthine  | 6.38              | 135.0313     | 118.5        | M-H                       | 68-94-0        | v               | v                  | v                | v           | Nucleosides/analogs     |
| Guanosine                 | Guanosine     | 7.84              | 282.0840     | 158.9        | M-H                       | 118-00-3       | v               | v                  | v                | v           | Nucleosides/analogs     |
| L-Tyrosine                | Tyrosine      | 8.27              | 180.0665     | 142.3        | M-H                       | 60-18-4        | v               | v                  | v                | v           | Amino acids/derivatives |
| L-Asparagine              | L-Asparagine  | 9.34              | 131.0459     | 197.9        | M-H                       | 70-47-3        | v               | v                  | N/A              |             | Amino acids/derivatives |
| Guanine                   | Guanine       | 7.49              | 150.0415     | 123.5        | M-H                       | 73-40-5        | v               | N/A                | v                |             | Nucleosides/analogs     |
| DAMP                      | DAMP          | 8.25              | 330.0604     | 170.8        | M-H                       | 653-63-4       | v               | v                  | v                | v           | Nucleotides/analogs     |
| (R,R)-L-(+)-Tartaric Acid | (R,R)-T Acid  | 10.12             | 149.0088     | 118.9        | M-H                       | 87-69-4        | v               | N/A                | v                |             | Organic acids           |

|                                                                        |                       |       |           |       |           |             |   |     |   |   |                         |
|------------------------------------------------------------------------|-----------------------|-------|-----------|-------|-----------|-------------|---|-----|---|---|-------------------------|
| N-Acetyl-DL-Tryptophan                                                 | N-A-Tryptophan        | 5.88  | 245.0930  | 157.0 | M-H       | 87-32-1     | v | v   | v | v | Organic acids           |
| D-Glucose 6-Phosphate                                                  | Glucose 6-P           | 9.61  | 259.0217  | 144.9 | M-H       | 56-73-5     | v | N/A | v |   | Phosphates              |
| LL-2,6-Diaminoheptanedioic Acid                                        | 2,6-DH Acid           | 10.62 | 189.0880  | 136.9 | M-H       | 583-93-7    | v | N/A | v |   | Amino acids/derivatives |
| Alpha-Aminodipic Acid                                                  | Aminoadipate          | 9.08  | 160.0614  | 129.1 | M-H       | 542-32-5    | v | v   | v | v | Amino acids/derivatives |
| D-Glucosamine 6-Phosphate                                              | G6P                   | 9.39  | 214.0480  | 142.0 | M-CO2-H   | 70442-23-8  | v | v   | v | v | Phosphates              |
| D-(+)-Trehalose                                                        | Trehalose             | 9.34  | 377.0850  | 172.9 | M+Cl      | 6138-23-4   | v | v   | v | v | Carbohydrates           |
| Adenosine 5'-Diphosphate                                               | ADP                   | 10.28 | 426.0207  | 183.8 | M-H       | 20398-34-9  | v | v   | v | v | Nucleotides/analogs     |
| 2-Deoxy-D-Glucose                                                      | 2-Deoxy-Glucose       | 8.2   | 163.0606  | 128.9 | M-H       | 154-17-6    | v | N/A | v |   | Carbohydrates           |
| 4-Pyridoxic Acid                                                       | 4-Pyridoxic Acid      | 2.16  | 164.0347  | 132.0 | M-H2O-H   | 82-82-6     | v | N/A | v |   | Organic acids           |
| 3-Hydroxy-3-Methylglutaric Acid                                        | 3-H-3-Methylglutarate | 7.8   | 161.0450  | 127.5 | M-H       | 503-49-1    | v | N/A | v |   | Organic acids           |
| Xanthosine                                                             | Xanthosine            | 8.24  | 283.0673  | 158.9 | M-H       | 146-80-5    | v | N/A | v |   | Nucleosides/analogs     |
| D-Galactaric Acid                                                      | Galactaric Acid       | 8.48  | 165.0395  | 125.6 | M-CO2-H   | 526-99-8    | v | N/A | v |   | Organic acids           |
| L-Histidine                                                            | L-Histidine           | 9.13  | 154.0622  | 128.0 | M-H       | 71-00-1     | v | v   | v | v | Amino acids/derivatives |
| Guanosine 5'-Triphosphate                                              | GTP                   | 11.78 | 521.9850  | 195.9 | M-H       | 36051-31-7  | v | v   | v | v | Nucleotides/analogs     |
| 2'-Deoxyguanosine 5'-Triphosphate                                      | 2'-DG-5'TP            | 10.91 | 505.9879  | 189.2 | M-H       | 93919-41-6  | v | v   | v | v | Nucleotides/analogs     |
| Inosine 5'-Diphosphate                                                 | IDP                   | 9.47  | 427.0068  | 176.9 | M-H       | 81012-88-6  | v | v   | v | v | Nucleotides/analogs     |
| Adenosine 5'-Monophosphate                                             | AMP                   | 8.56  | 347.0631n | 172.1 | M-H, 2M-H | 4578-31-8   | v | v   | v | v | Nucleotides/analogs     |
| Uridine 5'-Diphosphoglucose                                            | UDP-Glucose           | 9.78  | 565.0474  | 213.1 | M-H       | 28053-08-9  | v | v   | v | v | Nucleotides/analogs     |
| 2'-Deoxyguanosine 5'-Diphosphate                                       | dGDP                  | 10.57 | 408.0130  | 172.2 | M-H2O-H   | 102783-74-4 | v | N/A | v |   | Nucleotides/analogs     |
| Cytidine 2',3'-Cyclic Monophosphate                                    | cCMP                  | 7.28  | 260.0440  | 153.1 | M-CO2-H   | 15718-51-1  | v | v   | v | v | Nucleotides/analogs     |
| D-(-)-3-Phosphoglyceric Acid                                           | 3-PG Acid             | 11.12 | 220.9626  | 143.3 | M+Cl      | 80731-10-8  | v | N/A | v |   | Phosphates              |
| Thymidine 5'-Monophosphate                                             | dTMP                  | 8.21  | 321.0492  | 162.6 | M-H       | 365-07-1    | v | v   | v | v | Nucleotides/analogs     |
| N-Alpha-Acetyl-L-Lysine                                                | A-L-Lysine            | 9.03  | 187.1084  | 145.1 | M-H       | 1946-82-3   | v | v   | v | v | Amino acids/derivatives |
| Adenosine 5'-Triphosphate                                              | ATP                   | 10.27 | 505.9880  | 189.2 | M-H       | 34369-07-8  | v | v   | v | v | Nucleotides/analogs     |
| 2'-Deoxyguanosine                                                      | 2'-DG                 | 7.01  | 266.0887  | 159.5 | M-H       | 961-07-9    | v | v   | v | v | Nucleosides/analogs     |
| 5-Aminoimidazole-4-Carboxamide-1-Beta-D-Ribofuranosyl 5'-Monophosphate | AICAR                 | 8.58  | 383.0600  | 176.2 | M+FA-H    | 3031-94-5   | v | v   | v | v | Nucleotides/analogs     |
| Uridine 5'-Diphospho-N-Acetylgalactosamine                             | U-5'DP-AG             | 9.44  | 606.0738  | 225.2 | M-H       | 108320-87-2 | v | v   | v | v | Nucleotides/analogs     |
| Guanosine 3',5'-Cyclic Monophosphate                                   | cGMP                  | 8.47  | 344.0398  | 170.4 | M-H       | 40732-48-7  | v | v   | v | v | Nucleotides/analogs     |
| S-(5'-Adenosyl)-L-Homocysteine                                         | S-5'-Homocysteine     | 8.65  | 383.1135  | 186.6 | M-H       | 979-92-0    | v | v   | v | v | Not defined             |

|                                     |                       |       |           |       |              |            |   |     |   |   |                         |
|-------------------------------------|-----------------------|-------|-----------|-------|--------------|------------|---|-----|---|---|-------------------------|
| Guanosine 5'-Diphosphate            | GDP                   | 10.71 | 442.0167  | 181.8 | M-H          | 43139-22-6 | v | v   | v | v | Nucleosides/analog      |
| Uridine 5'-Diphosphoglucuronic Acid | UDP Glucuronic Acid   | 11.17 | 579.0267  | 212.8 | M-H          | 63700-19-6 | v | v   | v | v | Nucleotides/analog      |
| Cytidine 5'-Diphosphate             | CDP                   | 10.38 | 402.0097  | 172.3 | M-H          | 34393-59-4 | v | v   | v | v | Nucleotides/analog      |
| Guanosine 5'-Monophosphate          | GMP                   | 9.43  | 362.0497  | 169.9 | M-H          | 85-32-5    | v | v   | v | v | Nucleotides/analog      |
| Methyl-Beta-D-Galactoside           | M-B-Galactoside       | 6.88  | 193.0727  | 139.9 | M-H          | 1824-94-8  | v | v   | v | v | Carbohydrates           |
| Cytidine 5'-Monophosphate           | 5'-CMP                | 9.34  | 322.0443  | 162.6 | M-H          | 63-37-6    | v | v   | v | v | Nucleotides/analog      |
| Glutathione                         | GSH reduced           | 8.84  | 307.0826n | 161.4 | M-H2O-H, M-H | 70-18-8    | v | v   | v | v | Amino acids/derivatives |
| N-Acetyl-D-Galactosamine            | N-A-Galactosamine     | 8.81  | 202.0714  | 139.4 | M-H2O-H      | 1811-31-0  | v | v   | v | v | Carbohydrates           |
| N-Acetyl-DL-Glutamic Acid           | N-A-Glutamic Acid     | 9.02  | 188.0563  | 136.9 | M-H          | 1188-37-0  | v | v   | v | v | Organic acids           |
| D-Pantothenic Acid                  | Pantothenic Acid      | 6.12  | 218.1031  | 146.7 | M-H          | 137-08-6   | v | v   | v | v | Organic acids           |
| Adenosine                           | Adenosine             | 5.99  | 312.0946  | 164.6 | M+FA-H       | 58-61-7    | v | v   | v | v | Nucleosides/analog      |
| D-Lactose                           | Lactose               | 10.14 | 341.1074  | 170.5 | M-H          | 64044-51-5 | v | v   | v | v | Carbohydrates           |
| Cytidine 5'-Triphosphate            | CTP                   | 11.22 | 481.9749  | 182.7 | M-H          | 36051-68-0 | v | v   | v | v | Phosphates              |
| Cis-4-Hydroxy-Proline               | 4-H-Proline           | 8.67  | 176.0562  | 125.3 | M-H          | 2584-71-6  | v | N/A | v |   | Amino acids/derivatives |
| Adenosine 5'-Diphosphoribose        | ADP-Ribose            | 8.85  | 540.0537  | 213.5 | M-H2O-H      | 68414-18-6 | v | v   | v | v | Nucleotides/analog      |
| Ophthalmic Acid                     | Ophthalmic Acid       | 8.58  | 288.1197  | 160.4 | M-H          | 495-27-2   | v | v   | v | v | Amino acids/derivatives |
| Coenzyme A                          | CoA                   | 8.94  | 766.1078  | 249.0 | M-H          | 55672-92-9 | v | v   | v | v | Phosphates              |
| CDP-Ethanolamine                    | CDP-Ethanolamine      | 9.13  | 445.0526  | 178.2 | M-H          | 3036-18-8  | v | v   | v | v | Nucleotides/analog      |
| Stachyose                           | Stachyose             | 9.46  | 711.2175  | 247.9 | M+FA-H       | 54261-98-2 | v | v   | v | v | Carbohydrates           |
| D-Ribose-5-Phosphate                | Ribose 5-P            | 9.29  | 211.0002  | 134.1 | M-H2O-H      | 18265-46-8 | v | N/A | v |   | Phosphates              |
| N-Acetyl-DL-Serine                  | N-A-L-Serine          | 7.65  | 128.0346  | 178.3 | M-H2O-H      | 97-14-3    | v | N/A | v |   | Organic acids           |
| Glycerol 2-Phosphate                | G2-P                  | 9.03  | 171.0061  | 125.2 | M-H          | 819-83-0   | v | N/A | v |   | Phosphates              |
| N-Acetylproline                     | N-Acetylproline       | 5.75  | 156.0661  | 134.3 | M-H          | 68-95-1    | v | N/A | v |   | Amino acids/derivatives |
| Glycocholic Acid                    | Gcholic Acid          | 5.72  | 465.3091n | 204.2 | M-H, 2M-H    | 475-31-0   | v | v   | v | v | Organic acids           |
| Glycochenodeoxycholic Acid          | Gdeoxycholic Acid     | 5.14  | 448.3063  | 200.9 | M-H          | 640-79-9   | v | v   | v | v | Steroids                |
| Methyl-Vanillic Acid                | M-Vanillate           | 2.17  | 163.0407  | 135.3 | M-H2O-H      | 3943-74-6  | v | N/A | v |   | Organic acids           |
| 4-Hydroxybenzaldehyde               | 4-Hydroxybenzaldehyde | 1.56  | 121.0293  | 118.3 | M-H          | 123-08-0   | v | N/A | v |   | Not defined             |
| Pterin                              | Pterin                | 6.71  | 162.0418  | 125.8 | M-H          | 2236-60-4  | v | N/A | v |   | Nucleosides/analog      |
| Azelaic Acid                        | Azelaic Acid          | 4.15  | 187.0972  | 140.2 | M-H          | 123-99-9   | v | v   | v | v | Lipid/derivatives       |

|                       |                   |      |           |       |              |             |   |     |     |   |                   |
|-----------------------|-------------------|------|-----------|-------|--------------|-------------|---|-----|-----|---|-------------------|
| Suberic Acid          | Suberic Acid      | 5.79 | 173.0816  | 134.6 | M-H          | 505-48-6    | v | N/A | v   |   | Lipid/derivatives |
| Sebaic Acid           | Sebaic Acid       | 2.4  | 201.1139  | 145.9 | M-H          | 111-20-6    | v | N/A | v   |   | Organic acids     |
| D-(+)-Xylose          | Xylose            | 8.25 | 299.0998  | 161.7 | 2M-H         | 58-86-6     | v | N/A | v   |   | Carbohydrates     |
| Sucrose               | Sucrose           | 8.9  | 387.1141  | 174.4 | M+FA-H       | 57-50-1     | v | v   | v   | v | Carbohydrates     |
| Alpha-D-Glucose       | Glucose           | 8.57 | 180.0630n | 131.0 | M-H2O-H, M-H | 492-62-6    | v | v   | N/A |   | Carbohydrates     |
| Palatinose            | Palatinose        | 8.9  | 342.1161n | 168.8 | M-H, M+Cl    | 343336-76-5 | v | v   | v   | v | Carbohydrates     |
| Petroselinic Acid     | P Acid            | 1.67 | 281.2484  | 179.4 | M-H          | 593-39-5    | v | N/A | v   |   | Lipid/derivatives |
| Chenodeoxycholic Acid | Cdcholic Acid     | 2.62 | 391.2872  | 207.7 | M-H          | 474-25-9    | v | v   | v   | v | Steroids          |
| Myristic Acid         | Myristic Acid     | 1.13 | 227.2020  | 166.3 | M-H          | 544-63-8    | v | N/A | v   |   | Lipid/derivatives |
| Rosmarinic Acid       | Rosmarinic Acid   | 7.98 | 395.0540  | 177.6 | M+Cl         | 20283-92-5  | v | N/A | v   |   | Organic acids     |
| Taurolithocholic Acid | Tlcholic Acid     | 1.56 | 482.2943  | 209.2 | M-H          | 6042-32-6   | v | v   | v   | v | Steroids          |
| Hexadecanoic Acid     | Hexadecanoic Acid | 1.28 | 253.2164  | 170.2 | M-H          | 373-49-9    | v | N/A | v   |   | Lipid/derivatives |
| Palmitic Acid         | Palmitic Acid     | 1.66 | 255.2323  | 173.6 | M-H          | 57-10-3     | v | N/A | v   |   | Lipid/derivatives |
| Eicosapentaenoic Acid | EPA               | 0.96 | 347.2240  | 189.4 | M+FA-H       | 10417-94-4  | v | N/A | v   |   | Organic acids     |
| Cholic Acid           | Cholic Acid       | 2.28 | 407.2797  | 205.5 | M-H          | 81-25-4     | v | v   | v   | v | Steroids          |
| Oleic Acid            | Oleic Acid        | 1.31 | 281.2483  | 177.7 | M-H          | 112-80-1    | v | N/A | v   |   | Lipid/derivatives |
| Stearic Acid          | Stearic Acid      | 0.73 | 283.2640  | 181.1 | M-H          | 57-11-4     | v | N/A | v   |   | Lipid/derivatives |
| Cortisone             | Cortisone         | 1.93 | 405.1906  | 202.0 | M+FA-H       | 53-06-5     | v | v   | v   | v | Steroids          |
| Acetyl-CoA            | Acetyl-CoA        | 8.48 | 808.1185  | 254.2 | M-H          | 72-89-9     | v | v   | v   | v | Phosphates        |
| Succinyl-CoA          | Succinyl-CoA      | 9.91 | 866.1197  | 253.5 | M-H          | 604-98-8    | v | v   | v   | v | Phosphates        |
