# Supplementary material for: Choosing an Optimal Sample Preparation in Caulobacter crescentus for Untargeted Metabolomics Approaches
Source: MDPI journal article supplement (doi:10.3390/metabo9100193), 2019-09-20
Supplement: s1 [file s1]

| Compound          | Adapted Name          | pp1     | pp2     | pp3     | po      |
|-------------------|-----------------------|---------|---------|---------|---------|
| 8.20_163.0606m/z  | 2-Deoxy-Glucose       | -5.0965 | -0.0392 | -0.2964 | 0.0088  |
| 8.57_180.0630m/z  | Glucose               | -5.0706 | -0.1892 | -0.9428 | 0.5311  |
| 7.80_161.0450m/z  | 3-H-3-Methylglutarate | -5.0675 | 0.1847  | -0.5706 | 0.1822  |
| 1.56_482.2943m/z  | Tlcholic Acid         | -4.9201 | 0.0408  | -1.7274 | 0.5695  |
| 7.65_128.0346m/z  | N-A-L-Serine          | -4.8777 | -0.8124 | -0.6343 | -0.0675 |
| 5.72_465.3091m/z  | Gcholic Acid          | -4.7150 | 0.0540  | -0.9062 | 1.5982  |
| 8.25_299.0998m/z  | Xylose                | -4.5881 | -1.3152 | -0.9023 | 0.6000  |
| 5.14_448.3063m/z  | Gdeoxycholic Acid     | -4.5629 | 0.2266  | -1.3953 | 1.5733  |
| 8.16_242.0778m/z  | Cytidine              | -4.5525 | -1.3262 | -1.3837 | 0.7188  |
| 6.88_193.0727m/z  | M-B-Galactoside       | -4.4710 | -1.4135 | -0.5094 | 1.7238  |
| 7.49_150.0415m/z  | Guanine               | -4.4023 | 0.7359  | 1.7152  | 1.7495  |
| 8.27_180.0665m/z  | Tyrosine              | -4.3718 | 0.2472  | -0.7744 | 1.8423  |
| 8.48_165.0395m/z  | Galactaric Acid       | -4.1435 | -0.9627 | -0.7489 | 0.0032  |
| 9.08_160.0614m/z  | Amino adipate         | -4.0661 | -1.9071 | -1.2326 | -0.1902 |
| 8.58_383.0600m/z  | AICAR                 | -3.8789 | -0.4221 | -3.0328 | 0.1655  |
| 8.67_176.0562m/z  | 4-H-Proline           | -3.8702 | -0.8673 | -2.5240 | 1.2126  |
| 2.28_407.2797m/z  | Cholic Acid           | -3.8474 | 0.8321  | -0.2019 | 1.6314  |
| 6.67_151.0262m/z  | Xanthine              | -3.7928 | -0.1146 | -1.0626 | 2.3351  |
| 8.24_283.0673m/z  | Xanthosine            | -3.5638 | -2.7524 | -1.0375 | 1.0607  |
| 8.37_290.0877m/z  | N-AN Acid             | -3.4722 | -1.6112 | -0.7389 | 1.7593  |
| 7.01_267.0731m/z  | Inosine               | -3.4282 | -0.6847 | 1.1078  | 1.8397  |
| 1.56_121.0293m/z  | 4-Hydroxybenzaldehyde | -3.4105 | 0.3388  | -0.7422 | 0.7891  |
| 10.12_149.0088m/z | (R,R)-T Acid          | -3.3529 | 2.5490  | -2.6891 | 2.1134  |
| 8.47_344.0398m/z  | cGMP                  | -3.3455 | -0.8991 | 1.5142  | 1.6229  |
| 11.78_521.9850m/z | GTP                   | -3.1535 | 2.2483  | -3.1684 | 0.3904  |
| 9.61_259.0217m/z  | Glucose 6-P           | -3.0937 | 1.2827  | -2.8418 | 2.0393  |
| 8.92_195.0506m/z  | Gluconic Acid         | -3.0368 | -0.8976 | -3.3203 | 1.1769  |
| 2.62_391.2872m/z  | Cdcholic Acid         | -2.8201 | 0.3117  | -0.2486 | 1.7529  |
| 8.64_202.0717m/z  | N-AG                  | -2.8092 | -3.0671 | -1.3853 | 0.2989  |
| 6.12_218.1031m/z  | Pantothenic Acid      | -2.7786 | -0.8496 | -1.8857 | 2.7344  |
| 9.79_225.0987m/z  | Carnosine             | -2.7605 | -2.6667 | 1.6559  | -0.3467 |
| 9.91_866.1197m/z  | Succinyl-CoA          | -2.5792 | 2.5926  | -1.6874 | 2.1156  |
| 7.84_282.0840m/z  | Guanosine             | -2.5228 | -0.9369 | 2.1164  | 2.3972  |
| 1.13_227.2020m/z  | Myristic Acid         | -2.4457 | -0.9996 | -1.9200 | -0.2242 |
| 10.07_191.0195m/z | Citric Acid           | -2.4077 | 2.5009  | -1.8783 | 2.0557  |
| 9.78_565.0474m/z  | UDP-Glucose           | -2.3618 | 2.5362  | -1.8778 | 1.9924  |
| 10.27_505.9880m/z | ATP                   | -2.2992 | 3.2315  | -2.9378 | 1.8833  |
| 11.22_481.9749m/z | CTP                   | -2.2313 | 1.4432  | -4.1633 | 0.9752  |
| 10.57_408.0130m/z | dGTP                  | -2.1307 | 0.4344  | -0.4031 | 2.0940  |
| 5.90_134.0472m/z  | Adenine               | -2.0599 | -0.8917 | 2.9495  | 2.5346  |
| 9.39_214.0480m/z  | G6P                   | -1.9979 | -4.6907 | 0.9401  | 0.4390  |
| 8.81_202.0714m/z  | N-A-Galactosamine     | -1.9395 | -2.0273 | -2.9567 | 0.2263  |
| 10.14_341.1074m/z | Lactose               | -1.9004 | 1.0859  | 0.4349  | 2.3785  |
| 9.34_131.0459m/z  | L-Asparagine          | -1.8536 | -5.1755 | -1.6721 | 0.4263  |

|                   |                     |         |         |         |         |
|-------------------|---------------------|---------|---------|---------|---------|
| 0.96_347.2240m/z  | EPA                 | -1.8451 | 2.3910  | -2.1641 | 1.6710  |
| 10.91_505.9879m/z | 2'-DG-5'TP          | -1.8000 | 3.1792  | -3.7204 | 1.4472  |
| 2.16_164.0347m/z  | 4-Pyridoxic Acid    | -1.7504 | -0.5914 | -2.3420 | -0.1999 |
| 2.40_201.1139m/z  | Sebaic Acid         | -1.7251 | -0.9473 | -2.1713 | 0.9495  |
| 7.60_203.0825m/z  | L-Tryptophan        | -1.6111 | 0.8311  | 0.8294  | 3.6830  |
| 9.03_187.1084m/z  | A-L-Lysine          | -1.4245 | 1.7473  | -0.2162 | 1.5543  |
| 9.43_362.0497m/z  | GMP                 | -1.3585 | -4.4900 | -1.4912 | 1.2859  |
| 8.58_288.1197m/z  | Ophthalmic Acid     | -1.2045 | -4.1109 | -2.7970 | 2.1060  |
| 10.28_426.0207m/z | ADP                 | -0.7176 | -1.3904 | -4.9799 | 0.7970  |
| 5.88_245.0930m/z  | N-A-Tryptophan      | -0.7035 | 1.9192  | -2.0047 | 1.7327  |
| 11.08_338.9880m/z | F1,5-BP             | -0.6872 | 3.8318  | -2.8391 | 1.7733  |
| 7.09_164.0717m/z  | Phenylalanine       | -0.6528 | -1.1874 | 1.7160  | 3.7276  |
| 9.34_377.0850m/z  | Trehalose           | -0.6281 | -4.8255 | -3.4463 | 0.5169  |
| 4.15_187.0972m/z  | Azelaic Acid        | -0.5214 | 0.3813  | 2.4480  | -1.1458 |
| 6.38_135.0313m/z  | Hypoxanthine        | -0.4524 | 0.4609  | -1.6068 | 3.7447  |
| 9.19_145.0615m/z  | L-Glutamine         | -0.4521 | -4.5690 | 0.1173  | -1.3854 |
| 9.47_427.0068m/z  | IDP                 | -0.2894 | 3.8749  | -2.4989 | -0.2607 |
| 11.12_220.9626m/z | 3-PG Acid           | -0.1875 | -2.9709 | -0.5048 | 0.0232  |
| 9.13_154.0622m/z  | L-Histidine         | -0.0249 | -6.0384 | 1.1573  | 0.5838  |
| 9.46_711.2175m/z  | Stachyose           | -0.0240 | -1.8737 | 4.0915  | -0.9281 |
| 1.67_281.2484m/z  | P Acid              | -0.0208 | -2.1281 | 5.9918  | -0.1653 |
| 9.29_211.0002m/z  | Ribose 5-P          | 0.0042  | -5.3088 | -2.5879 | 0.3701  |
| 8.90_387.1141m/z  | Sucrose             | 0.1026  | -0.6937 | 2.2820  | -1.9968 |
| 8.90_342.1161m/z  | Palatinose          | 0.1153  | -0.7005 | 2.2784  | -1.9063 |
| 0.73_283.2640m/z  | Stearic Acid        | 0.1494  | 1.2457  | -5.1839 | -0.0002 |
| 10.71_442.0167m/z | GDP                 | 0.2603  | -0.4810 | -4.0369 | 1.1835  |
| 1.66_255.2323m/z  | Palmitic Acid       | 0.2962  | -1.9058 | 5.9029  | -0.1723 |
| 10.38_402.0097m/z | CDP                 | 0.3384  | -1.3166 | -3.1832 | 1.1930  |
| 9.13_445.0526m/z  | CDP-Ethanolamine    | 0.7761  | -0.7203 | 1.1564  | -1.0465 |
| 1.93_405.1906m/z  | Cortisone           | 0.9021  | -1.0666 | 1.7589  | -0.6606 |
| 7.98_395.0540m/z  | Rosmarinic Acid     | 1.2492  | 1.8026  | 0.8980  | -1.1315 |
| 8.68_219.0508m/z  | Shikimic Acid       | 1.3386  | 0.9999  | 2.5213  | 0.4058  |
| 5.79_173.0816m/z  | Suberic Acid        | 1.3993  | 0.2825  | 1.7688  | -2.2380 |
| 9.44_606.0738m/z  | U-5'DP-AG           | 1.4194  | -3.9288 | -1.7994 | 1.7939  |
| 2.17_163.0407m/z  | M-Vanillate         | 1.5245  | 1.9803  | 1.7358  | 1.7069  |
| 9.02_188.0563m/z  | N-A-Glutamic Acid   | 1.5389  | -1.4725 | -4.3584 | 1.9646  |
| 8.85_540.0537m/z  | ADP-Ribose          | 1.8988  | -2.4933 | -2.2450 | 2.1296  |
| 9.34_322.0443m/z  | 5'-CMP              | 1.9403  | -5.5537 | -2.0677 | 1.4755  |
| 8.71_237.0613m/z  | Quinic Acid         | 1.9827  | 0.4635  | 2.2008  | 0.8706  |
| 11.17_579.0267m/z | UDP Glucuronic Acid | 2.1310  | -0.0766 | -1.7162 | 1.6201  |
| 8.98_147.0527m/z  | Glutamic Acid       | 2.2043  | -3.0585 | -1.6082 | 2.7583  |
| 5.75_156.0661m/z  | N-Acetylproline     | 2.2271  | 0.7485  | -0.8034 | 2.0453  |
| 9.19_347.0403m/z  | IMP                 | 2.6901  | -3.8223 | -1.9477 | 1.4659  |
| 7.28_260.0440m/z  | cCMP                | 2.7840  | 3.3722  | 0.2125  | -0.3016 |
| 9.03_171.0061m/z  | G2-P                | 2.8322  | -1.8263 | -1.1515 | 2.4218  |

|                   |                   |        |         |         |        |
|-------------------|-------------------|--------|---------|---------|--------|
| 8.65_383.1135m/z  | S-5'-Homocysteine | 2.9137 | -4.1650 | -2.3720 | 1.1435 |
| 10.62_189.0880m/z | 2,6-DH Acid       | 2.9424 | -1.1604 | -1.2257 | 0.5604 |
| 8.84_307.0826m/z  | GSH reduced       | 2.9882 | 2.7260  | -0.4841 | 1.4528 |
| 8.97_323.0285m/z  | U-5MP             | 3.1789 | -0.9290 | 1.0524  | 2.3436 |
| 8.48_808.1185m/z  | Acetyl-CoA        | 3.1972 | -1.8500 | -4.0204 | 1.4139 |
| 5.99_312.0946m/z  | Adenosine         | 3.3364 | 0.1368  | 0.9854  | 2.2246 |
| 6.33_243.0622m/z  | Uridine           | 3.3701 | -0.5588 | 1.0765  | 2.5532 |
| 7.01_266.0887m/z  | 2'-DG             | 3.4684 | -0.2206 | 1.7232  | 2.1613 |
| 6.71_162.0418m/z  | Pterin            | 3.4863 | -2.7360 | -1.2406 | 0.8604 |
| 8.94_766.1078m/z  | CoA               | 3.5037 | 0.6781  | -1.4685 | 1.1592 |
| 7.30_130.0872m/z  | L-Isoleucine      | 3.5730 | -1.1786 | 1.1065  | 2.1983 |
| 1.31_281.2483m/z  | Oleic Acid        | 3.7936 | 1.2223  | -3.0000 | 0.8277 |
| 1.28_253.2164m/z  | Hexadecanoic Acid | 3.9982 | -0.8985 | -2.3834 | 2.1396 |
| 8.56_347.0631m/z  | AMP               | 4.3151 | -2.8203 | -1.0489 | 1.3063 |
| 8.45_167.0210m/z  | Uric Acid         | 4.3918 | -1.7981 | -0.9647 | 1.8605 |
| 8.21_321.0492m/z  | dTMP              | 4.4910 | -1.9243 | 0.0850  | 1.7965 |
| 8.25_330.0604m/z  | DAMP              | 4.5255 | -2.0900 | 0.1587  | 1.4598 |
