# Supplementary material for: Choosing an Optimal Sample Preparation in Caulobacter crescentus for Untargeted Metabolomics Approaches
Source: MDPI journal article supplement (doi:10.3390/metabo9100193), 2019-09-20
Supplement: s1 [file s1]

| Compound          | m/z      | Rt (min) | CCS (Å <sup>2</sup> ) | QC 1      | QC 2      | QC 3      | QC 4      | QC 5      | QC 6      | Mean      | SD      | RSD    |
|-------------------|----------|----------|-----------------------|-----------|-----------|-----------|-----------|-----------|-----------|-----------|---------|--------|
| 1.34_581.2430m/z  | 581.2430 | 1.34     | 233.0                 | 174.91    | 173.89    | 192.25    | 125.90    | 187.00    | 174.71    | 171.44    | 21.52   | 12.5%  |
| 7.28_260.0440m/z  | 260.0440 | 7.28     | 153.1                 | 190.88    | 192.13    | 194.40    | 189.64    | 190.58    | 191.48    | 191.52    | 1.50    | 0.8%   |
| 9.44_606.0738m/z  | 606.0738 | 9.44     | 225.2                 | 626.39    | 656.34    | 630.33    | 497.48    | 704.14    | 624.18    | 623.14    | 62.61   | 10.0%  |
| 7.12_266.0886m/z  | 266.0886 | 7.12     | 156.2                 | 46.10     | 48.12     | 44.06     | 43.36     | 48.68     | 46.05     | 46.06     | 1.93    | 4.2%   |
| 8.58_288.1197m/z  | 288.1197 | 8.58     | 160.4                 | 1363.14   | 1426.29   | 1324.65   | 1364.37   | 1357.55   | 1365.14   | 1366.86   | 30.06   | 2.2%   |
| 2.90_241.0722m/z  | 241.0722 | 2.90     | 135.9                 | 2.16      | 1.92      | 0.00      | 2.92      | 1.80      | 2.16      | 1.83      | 0.89    | 48.8%  |
| 7.98_395.0540m/z  | 395.0540 | 7.98     | 177.6                 | 0.00      | 0.00      | 0.00      | 0.00      | 0.00      | 0.00      | 0.00      | 0.00    | 141.4% |
| 1.67_281.2484m/z  | 281.2484 | 1.67     | 179.4                 | 16940.78  | 16842.31  | 16692.59  | 17439.09  | 16655.58  | 16939.94  | 16918.38  | 257.53  | 1.5%   |
| 8.48_165.0395m/z  | 165.0395 | 8.48     | 125.6                 | 45.61     | 47.67     | 45.13     | 44.29     | 45.92     | 45.67     | 45.71     | 1.02    | 2.2%   |
| 1.28_281.2475m/z  | 281.2475 | 1.28     | 293.1                 | 6.26      | 0.00      | 6.61      | 7.46      | 4.06      | 6.26      | 5.11      | 2.50    | 49.0%  |
| 0.96_347.2240m/z  | 347.2240 | 0.96     | 189.4                 | 0.00      | 0.00      | 0.00      | 0.00      | 0.00      | 0.00      | 0.00      | 0.00    |        |
| 8.04_349.0387m/z  | 349.0387 | 8.04     | 177.1                 | 50.41     | 47.21     | 53.41     | 49.72     | 49.76     | 50.41     | 50.15     | 1.81    | 3.6%   |
| 9.59_606.0761m/z  | 606.0761 | 9.59     | 227.0                 | 0.00      | 0.00      | 0.00      | 0.00      | 0.00      | 0.00      | 0.00      | 0.00    |        |
| 1.31_281.2483m/z  | 281.2483 | 1.31     | 177.7                 | 7366.69   | 7222.18   | 7584.17   | 7309.17   | 7258.44   | 7365.36   | 7351.00   | 116.71  | 1.6%   |
| 1.28_253.2164m/z  | 253.2164 | 1.28     | 170.2                 | 2026.68   | 1933.39   | 2123.09   | 1991.77   | 2021.82   | 2025.30   | 2020.34   | 56.28   | 2.8%   |
| 8.48_808.1185m/z  | 808.1185 | 8.48     | 254.2                 | 906.96    | 1105.74   | 999.11    | 1067.43   | 1007.34   | 1042.52   | 1021.52   | 62.54   | 6.1%   |
| 10.12_149.0088m/z | 149.0088 | 10.12    | 118.9                 | 39.18     | 34.07     | 41.52     | 40.27     | 42.02     | 39.07     | 39.36     | 2.60    | 6.6%   |
| 9.64_179.0557m/z  | 179.0557 | 9.64     | 131.0                 | 29.51     | 29.02     | 30.69     | 27.39     | 31.01     | 29.46     | 29.51     | 1.18    | 4.0%   |
| 1.20_691.4193m/z  | 691.4193 | 1.20     | 267.4                 | 0.00      | 6.34      | 6.56      | 6.81      | 0.00      | 6.48      | 4.36      | 3.09    | 70.8%  |
| 9.36_342.1162n    | 387.1144 | 9.36     | 176.1                 | 13344.26  | 11683.17  | 13711.36  | 14337.42  | 12286.25  | 13347.91  | 13118.39  | 884.46  | 6.7%   |
| 8.67_130.0508m/z  | 130.0508 | 8.67     | 125.3                 | 142.31    | 140.45    | 144.85    | 144.97    | 136.80    | 142.38    | 141.96    | 2.79    | 2.0%   |
| 1.56_482.2943m/z  | 482.2943 | 1.56     | 209.2                 | 160022.03 | 157694.76 | 159233.66 | 163187.60 | 158795.33 | 159967.96 | 159816.89 | 1698.71 | 1.1%   |
| 8.90_342.1161n    | 341.1088 | 8.90     | 168.8                 | 1153.34   | 1120.48   | 1137.64   | 1191.08   | 1154.79   | 1152.58   | 1151.65   | 21.35   | 1.9%   |
| 9.46_711.2175m/z  | 711.2175 | 9.46     | 247.9                 | 2.63      | 2.52      | 0.00      | 2.98      | 0.00      | 2.64      | 1.79      | 1.28    | 71.2%  |
| 10.62_189.0880m/z | 189.0880 | 10.62    | 136.9                 | 38.86     | 42.37     | 11.12     | 63.95     | 44.81     | 38.78     | 39.98     | 15.49   | 38.7%  |
| 8.20_163.0606m/z  | 163.0606 | 8.20     | 128.9                 | 143.29    | 146.54    | 142.73    | 142.08    | 142.08    | 143.35    | 143.35    | 1.52    | 1.1%   |
| 9.29_549.1679m/z  | 549.1679 | 9.29     | 220.6                 | 0.00      | 0.00      | 0.00      | 0.00      | 0.00      | 0.00      | 0.00      | 0.00    |        |
| 9.79_225.0987m/z  | 225.0987 | 9.79     | 149.6                 | 8.65      | 8.80      | 6.52      | 9.48      | 8.86      | 8.64      | 8.49      | 0.93    | 10.9%  |

|                   |          |       |       |          |          |          |          |          |          |          |        |        |
|-------------------|----------|-------|-------|----------|----------|----------|----------|----------|----------|----------|--------|--------|
| 10.57_408.0130m/z | 408.0130 | 10.57 | 172.2 | 21.07    | 23.09    | 7.45     | 22.97    | 23.99    | 21.04    | 19.93    | 5.69   | 28.5%  |
| 9.39_214.0480m/z  | 214.0480 | 9.39  | 142.0 | 282.14   | 252.61   | 302.00   | 287.85   | 264.60   | 282.06   | 278.54   | 15.96  | 5.7%   |
| 8.37_290.0877m/z  | 290.0877 | 8.37  | 158.6 | 498.00   | 511.65   | 498.08   | 488.42   | 498.74   | 498.43   | 498.89   | 6.76   | 1.4%   |
| 11.12_220.9626m/z | 220.9626 | 11.12 | 143.3 | 0.00     | 0.00     | 0.02     | 0.12     | 0.11     | 0.00     | 0.04     | 0.05   | 127.3% |
| 8.64_202.0717m/z  | 202.0717 | 8.64  | 142.6 | 209.42   | 207.18   | 213.68   | 208.26   | 206.63   | 209.40   | 209.09   | 2.30   | 1.1%   |
| 9.91_866.1197m/z  | 866.1197 | 9.91  | 253.5 | 2.71     | 2.06     | 0.00     | 1.95     | 3.51     | 2.52     | 2.13     | 1.08   | 50.7%  |
| 9.78_565.0474m/z  | 565.0474 | 9.78  | 213.1 | 272.62   | 242.41   | 270.33   | 289.81   | 287.54   | 271.86   | 272.43   | 15.47  | 5.7%   |
| 8.65_383.1135m/z  | 383.1135 | 8.65  | 186.6 | 152.98   | 153.80   | 154.27   | 154.52   | 148.25   | 153.09   | 152.82   | 2.12   | 1.4%   |
| 1.93_405.1906m/z  | 405.1906 | 1.93  | 202.0 | 0.00     | 0.00     | 0.00     | 0.00     | 0.00     | 0.00     | 0.00     | 0.00   |        |
| 2.54_391.2868m/z  | 391.2868 | 2.54  | 211.3 | 1.63     | 1.36     | 0.00     | 0.00     | 2.16     | 1.17     | 1.06     | 0.81   | 76.3%  |
| 2.28_407.2797m/z  | 407.2797 | 2.28  | 205.5 | 20256.04 | 20382.49 | 18804.57 | 21704.13 | 19725.33 | 20259.19 | 20188.63 | 863.53 | 4.3%   |
| 7.01_266.0887m/z  | 266.0887 | 7.01  | 159.5 | 4.68     | 1.84     | 2.06     | 6.22     | 3.14     | 4.69     | 3.77     | 1.57   | 41.6%  |
| 11.08_338.9880m/z | 338.9880 | 11.08 | 152.2 | 10.04    | 10.26    | 9.68     | 0.00     | 0.00     | 10.01    | 6.67     | 4.72   | 70.8%  |
| 10.28_426.0207m/z | 426.0207 | 10.28 | 182.1 | 76.89    | 83.82    | 63.17    | 77.79    | 78.86    | 76.91    | 76.24    | 6.30   | 8.3%   |
| 8.25_299.0998m/z  | 299.0998 | 8.25  | 161.7 | 172.46   | 174.75   | 177.05   | 164.89   | 172.93   | 172.52   | 172.43   | 3.74   | 2.2%   |
| 8.84_307.0826n    | 306.0764 | 8.84  | 161.4 | 14301.27 | 15859.70 | 13249.99 | 14472.12 | 14555.70 | 14481.94 | 14486.79 | 758.72 | 5.2%   |
| 9.13_445.0526m/z  | 445.0526 | 9.13  | 178.2 | 0.00     | 0.00     | 0.00     | 0.00     | 0.00     | 0.00     | 0.00     | 0.00   |        |
| 8.30_171.0406m/z  | 171.0406 | 8.30  | 131.6 | 140.68   | 139.12   | 143.70   | 138.06   | 141.24   | 140.61   | 140.57   | 1.76   | 1.3%   |
| 9.80_193.0352m/z  | 193.0352 | 9.80  | 131.8 | 0.48     | 0.00     | 0.47     | 0.53     | 0.48     | 0.48     | 0.41     | 0.18   | 45.0%  |
| 6.88_193.0727m/z  | 193.0727 | 6.88  | 139.9 | 1025.08  | 1006.40  | 1033.33  | 1028.98  | 1025.95  | 1024.51  | 1024.04  | 8.44   | 0.8%   |
| 9.03_187.1084m/z  | 187.1084 | 9.03  | 145.1 | 0.00     | 7.18     | 7.36     | 7.16     | 7.39     | 7.27     | 6.06     | 2.71   | 44.7%  |
| 9.08_160.0614m/z  | 160.0614 | 9.08  | 129.1 | 49.30    | 50.54    | 50.21    | 45.45    | 50.72    | 49.29    | 49.25    | 1.79   | 3.6%   |
| 8.94_766.1078m/z  | 766.1078 | 8.94  | 249.0 | 2.16     | 776.99   | 716.64   | 785.60   | 823.73   | 781.54   | 647.78   | 290.43 | 44.8%  |
| 10.14_341.1074m/z | 341.1074 | 10.14 | 170.5 | 26.93    | 25.30    | 24.16    | 32.72    | 24.06    | 26.95    | 26.69    | 2.94   | 11.0%  |
| 8.57_180.0630n    | 179.0561 | 8.57  | 131.0 | 7950.07  | 8028.21  | 7996.43  | 7847.79  | 7938.13  | 7950.38  | 7951.84  | 56.04  | 0.7%   |
| 9.29_211.0002m/z  | 211.0002 | 9.29  | 134.1 | 0.00     | 0.00     | 0.00     | 0.00     | 0.00     | 0.00     | 0.00     | 0.00   |        |
| 6.71_162.0418m/z  | 162.0418 | 6.71  | 125.8 | 347.90   | 344.43   | 350.07   | 345.61   | 350.80   | 347.69   | 347.75   | 2.25   | 0.6%   |
| 6.12_134.0463m/z  | 134.0463 | 6.12  | 170.3 | 0.00     | 0.00     | 0.00     | 0.00     | 0.00     | 0.00     | 0.00     | 0.00   | 141.8% |
| 9.02_188.0563m/z  | 188.0563 | 9.02  | 136.9 | 1324.02  | 1467.60  | 1415.75  | 1344.48  | 1398.12  | 1402.88  | 1392.14  | 47.11  | 3.4%   |

|                   |          |       |       |           |           |           |           |           |           |           |         |        |
|-------------------|----------|-------|-------|-----------|-----------|-----------|-----------|-----------|-----------|-----------|---------|--------|
| 8.96_369.0099m/z  | 369.0099 | 8.96  | 168.1 | 32.74     | 28.87     | 39.89     | 1.74      | 0.00      | 12.95     | 19.37     | 15.37   | 79.4%  |
| 9.34_322.0443m/z  | 322.0443 | 9.34  | 162.6 | 486.96    | 485.14    | 490.71    | 466.57    | 507.04    | 486.31    | 487.12    | 11.81   | 2.4%   |
| 5.75_156.0661m/z  | 156.0661 | 5.75  | 134.3 | 9.11      | 7.02      | 10.89     | 8.16      | 10.01     | 9.07      | 9.04      | 1.24    | 13.7%  |
| 7.65_128.0346m/z  | 128.0346 | 7.65  | 178.3 | 20.02     | 17.69     | 20.92     | 19.85     | 21.07     | 18.16     | 19.62     | 1.28    | 6.5%   |
| 8.58_383.0600m/z  | 383.0600 | 8.58  | 176.2 | 11.34     | 12.26     | 9.70      | 13.58     | 6.15      | 11.42     | 10.74     | 2.36    | 22.0%  |
| 10.91_505.9879m/z | 505.9879 | 10.91 | 189.2 | 13.93     | 15.51     | 9.81      | 0.00      | 8.96      | 13.94     | 10.36     | 5.19    | 50.1%  |
| 8.24_283.0673m/z  | 283.0673 | 8.24  | 158.9 | 97.88     | 99.01     | 97.26     | 97.39     | 98.18     | 97.87     | 97.93     | 0.57    | 0.6%   |
| 5.99_312.0946m/z  | 312.0946 | 5.99  | 164.6 | 2295.21   | 2248.43   | 2371.14   | 2219.43   | 2325.64   | 2293.54   | 2292.23   | 49.28   | 2.1%   |
| 8.81_202.0714m/z  | 202.0714 | 8.81  | 139.4 | 5.26      | 34.95     | 24.55     | 31.25     | 30.14     | 30.23     | 26.06     | 9.79    | 37.6%  |
| 8.85_540.0537m/z  | 540.0537 | 8.85  | 213.5 | 4982.45   | 5543.37   | 4489.05   | 5033.41   | 5097.38   | 5025.36   | 5028.50   | 306.32  | 6.1%   |
| 8.98_147.0527n    | 146.0457 | 8.98  | 123.9 | 905.38    | 892.03    | 954.55    | 866.43    | 893.01    | 905.38    | 902.80    | 26.54   | 2.9%   |
| 1.90_391.2842m/z  | 391.2842 | 1.90  | 204.1 | 4330.42   | 4252.60   | 4338.24   | 4391.26   | 4302.84   | 4328.90   | 4324.04   | 41.51   | 1.0%   |
| 8.47_344.0398m/z  | 344.0398 | 8.47  | 170.4 | 119.31    | 123.32    | 120.54    | 110.58    | 123.95    | 119.31    | 119.50    | 4.38    | 3.7%   |
| 2.17_163.0407m/z  | 163.0407 | 2.17  | 135.3 | 0.00      | 0.00      | 0.00      | 0.00      | 0.00      | 0.00      | 0.00      | 0.00    |        |
| 11.17_579.0267m/z | 579.0267 | 11.17 | 212.8 | 2640.43   | 2677.59   | 2792.19   | 2046.45   | 2643.92   | 2640.69   | 2573.54   | 241.66  | 9.4%   |
| 8.25_330.0604m/z  | 330.0604 | 8.25  | 170.8 | 132.24    | 133.53    | 133.79    | 131.01    | 130.50    | 132.31    | 132.23    | 1.20    | 0.9%   |
| 5.14_448.3063m/z  | 448.3063 | 5.14  | 200.9 | 14597.28  | 13675.35  | 15611.84  | 13898.55  | 14954.85  | 14576.76  | 14552.44  | 643.39  | 4.4%   |
| 1.13_227.2020m/z  | 227.2020 | 1.13  | 166.3 | 0.00      | 0.00      | 0.00      | 0.00      | 0.00      | 0.00      | 0.00      | 0.00    | 223.6% |
| 8.92_195.0506m/z  | 195.0506 | 8.92  | 131.7 | 721.15    | 791.82    | 661.48    | 716.76    | 746.43    | 725.80    | 727.24    | 38.75   | 5.3%   |
| 5.79_173.0816m/z  | 173.0816 | 5.79  | 134.6 | 483.96    | 559.89    | 351.90    | 542.87    | 459.75    | 487.17    | 480.92    | 67.35   | 14.0%  |
| 5.72_465.3091n    | 464.3018 | 5.72  | 204.2 | 190587.71 | 186927.09 | 193350.38 | 190110.93 | 190811.33 | 190483.99 | 190378.57 | 1873.42 | 1.0%   |
| 2.62_391.2872m/z  | 391.2872 | 2.62  | 207.7 | 9.57      | 8.14      | 6.37      | 11.93     | 7.95      | 9.59      | 8.92      | 1.73    | 19.4%  |
| 8.21_321.0492m/z  | 321.0492 | 8.21  | 162.6 | 674.51    | 686.50    | 670.70    | 673.61    | 669.38    | 674.74    | 674.91    | 5.54    | 0.8%   |
| 10.71_442.0167m/z | 442.0167 | 10.71 | 181.8 | 125.11    | 136.17    | 66.38     | 179.62    | 148.40    | 124.90    | 130.10    | 34.00   | 26.1%  |
| 8.68_219.0508m/z  | 219.0508 | 8.68  | 141.7 | 0.00      | 1.21      | 0.00      | 1.37      | 1.11      | 1.22      | 0.82      | 0.58    | 71.3%  |
| 9.19_347.0403m/z  | 347.0403 | 9.19  | 170.3 | 69.57     | 72.26     | 67.52     | 70.84     | 68.12     | 69.62     | 69.66     | 1.59    | 2.3%   |
| 9.34_377.0850m/z  | 377.0850 | 9.34  | 172.9 | 304.89    | 254.91    | 343.88    | 242.23    | 340.75    | 302.98    | 298.27    | 38.67   | 13.0%  |
| 7.65_128.0351m/z  | 128.0351 | 7.65  | 123.9 | 559.34    | 552.21    | 572.63    | 540.50    | 571.71    | 558.77    | 559.19    | 11.07   | 2.0%   |
| 8.73_177.0396m/z  | 177.0396 | 8.73  | 128.0 | 0.00      | 1.19      | 1.35      | 0.17      | 3.42      | 1.19      | 1.22      | 1.11    | 91.4%  |

|                   |          |       |       |         |         |         |         |         |         |         |        |        |
|-------------------|----------|-------|-------|---------|---------|---------|---------|---------|---------|---------|--------|--------|
| 9.47_427.0068m/z  | 427.0068 | 9.47  | 176.9 | 2.18    | 371.44  | 481.36  | 32.62   | 458.10  | 365.90  | 285.27  | 194.17 | 68.1%  |
| 11.78_521.9850m/z | 521.9850 | 11.78 | 195.9 | 4.20    | 4.15    | 4.39    | 4.04    | 4.18    | 4.20    | 4.20    | 0.10   | 2.5%   |
| 9.43_362.0497m/z  | 362.0497 | 9.43  | 169.9 | 263.22  | 253.95  | 269.64  | 248.56  | 277.44  | 262.67  | 262.58  | 9.51   | 3.6%   |
| 7.84_282.0840m/z  | 282.0840 | 7.84  | 158.9 | 1951.56 | 1911.71 | 1971.97 | 1968.32 | 1937.64 | 1950.81 | 1948.67 | 20.12  | 1.0%   |
| 2.16_164.0347m/z  | 164.0347 | 2.16  | 132.0 | 0.00    | 0.00    | 0.00    | 0.00    | 0.00    | 0.00    | 0.00    | 0.00   |        |
| 6.43_218.1028m/z  | 218.1028 | 6.43  | 146.7 | 242.80  | 252.10  | 235.72  | 237.44  | 246.69  | 242.79  | 242.92  | 5.48   | 2.3%   |
| 8.71_237.0613m/z  | 237.0613 | 8.71  | 145.8 | 161.46  | 178.33  | 157.71  | 150.21  | 172.76  | 164.07  | 164.09  | 9.29   | 5.7%   |
| 7.30_130.0872m/z  | 130.0872 | 7.30  | 130.1 | 1369.54 | 1354.47 | 1402.07 | 1314.71 | 1404.94 | 1368.21 | 1368.99 | 30.40  | 2.2%   |
| 7.60_203.0825m/z  | 203.0825 | 7.60  | 149.1 | 2920.56 | 2879.57 | 2953.20 | 2916.56 | 2917.08 | 2919.29 | 2917.71 | 21.32  | 0.7%   |
| 9.13_154.0622m/z  | 154.0622 | 9.13  | 128.0 | 57.11   | 41.88   | 69.38   | 62.91   | 54.49   | 57.08   | 57.14   | 8.40   | 14.7%  |
| 9.34_131.0459m/z  | 131.0459 | 9.34  | 197.9 | 11.21   | 0.00    | 18.50   | 17.39   | 16.34   | 17.37   | 13.47   | 6.46   | 48.0%  |
| 11.22_481.9749m/z | 481.9749 | 11.22 | 182.7 | 8.54    | 8.77    | 9.52    | 1.14    | 7.69    | 8.55    | 7.37    | 2.84   | 38.5%  |
| 8.16_242.0778m/z  | 242.0778 | 8.16  | 153.8 | 399.16  | 402.02  | 400.72  | 394.30  | 399.80  | 399.10  | 399.18  | 2.40   | 0.6%   |
| 7.09_164.0717m/z  | 164.0717 | 7.09  | 138.5 | 6193.97 | 6100.05 | 6210.53 | 6205.54 | 6239.68 | 6189.78 | 6189.92 | 43.28  | 0.7%   |
| 10.38_402.0097m/z | 402.0097 | 10.38 | 172.3 | 1.00    | 1.01    | 0.00    | 0.00    | 9.59    | 0.96    | 2.09    | 3.38   | 161.6% |
| 8.56_347.0631n    | 346.0558 | 8.56  | 172.1 | 9061.36 | 9428.95 | 8880.69 | 9041.16 | 9026.15 | 9074.74 | 9085.51 | 166.38 | 1.8%   |
| 7.14_328.0448m/z  | 328.0448 | 7.14  | 167.5 | 230.70  | 231.29  | 226.05  | 230.14  | 236.05  | 230.47  | 230.78  | 2.91   | 1.3%   |
| 8.27_180.0665m/z  | 180.0665 | 8.27  | 142.3 | 7073.02 | 6963.12 | 7191.70 | 7002.48 | 7101.21 | 7069.04 | 7066.76 | 72.70  | 1.0%   |
| 8.97_323.0285m/z  | 323.0285 | 8.97  | 160.9 | 3390.36 | 3757.76 | 3059.03 | 3355.57 | 3482.70 | 3407.13 | 3408.76 | 205.24 | 6.0%   |
| 6.33_243.0622m/z  | 243.0622 | 6.33  | 148.8 | 4058.35 | 4002.61 | 4126.76 | 4033.30 | 4044.27 | 4056.88 | 4053.69 | 37.60  | 0.9%   |
| 9.64_426.0218m/z  | 426.0218 | 9.64  | 183.8 | 745.68  | 739.75  | 716.43  | 707.46  | 805.47  | 743.33  | 743.02  | 31.33  | 4.2%   |
| 7.01_267.0731m/z  | 267.0731 | 7.01  | 156.1 | 1507.39 | 1508.90 | 1478.86 | 1544.54 | 1491.09 | 1507.19 | 1506.33 | 20.23  | 1.3%   |
| 8.90_387.1141m/z  | 387.1141 | 8.90  | 174.4 | 394.01  | 372.55  | 408.78  | 387.82  | 404.63  | 393.49  | 393.55  | 11.75  | 3.0%   |
| 9.19_145.0615m/z  | 145.0615 | 9.19  | 130.3 | 0.00    | 0.00    | 0.00    | 0.00    | 0.00    | 0.00    | 0.00    | 0.00   |        |
| 9.61_259.0217m/z  | 259.0217 | 9.61  | 144.9 | 206.09  | 210.76  | 195.49  | 202.58  | 215.89  | 205.79  | 206.10  | 6.36   | 3.1%   |
| 10.27_505.9880m/z | 505.9880 | 10.27 | 189.2 | 218.62  | 214.45  | 101.64  | 302.58  | 249.04  | 217.85  | 217.36  | 60.09  | 27.6%  |
| 10.31_744.0846m/z | 744.0846 | 10.31 | 226.9 | 0.00    | 0.00    | 0.00    | 0.00    | 0.00    | 0.00    | 0.00    | 0.00   | 141.5% |
| 8.67_176.0562m/z  | 176.0562 | 8.67  | 129.6 | 13.22   | 14.30   | 12.27   | 12.45   | 14.27   | 13.23   | 13.29   | 0.79   | 5.9%   |
| 1.44_691.4191m/z  | 691.4191 | 1.44  | 269.3 | 0.00    | 34.29   | 37.78   | 29.96   | 37.39   | 34.89   | 29.05   | 13.24  | 45.6%  |

|                   |          |       |       |         |         |         |         |         |         |         |        |        |
|-------------------|----------|-------|-------|---------|---------|---------|---------|---------|---------|---------|--------|--------|
| 0.73_283.2640m/z  | 283.2640 | 0.73  | 181.1 | 332.80  | 320.27  | 354.75  | 309.78  | 340.37  | 332.42  | 331.73  | 14.25  | 4.3%   |
| 2.40_201.1139m/z  | 201.1139 | 2.40  | 145.9 | 0.00    | 0.00    | 0.00    | 0.00    | 0.00    | 0.00    | 0.00    | 0.00   | 223.6% |
| 2.17_107.0498m/z  | 107.0498 | 2.17  | 120.0 | 8.62    | 8.59    | 0.00    | 8.97    | 9.08    | 8.52    | 7.30    | 3.27   | 44.8%  |
| 9.03_171.0061m/z  | 171.0061 | 9.03  | 125.2 | 92.87   | 104.58  | 81.87   | 92.97   | 95.70   | 93.69   | 93.61   | 6.63   | 7.1%   |
| 4.15_187.0972m/z  | 187.0972 | 4.15  | 140.2 | 4837.75 | 4822.22 | 4686.28 | 4938.70 | 4873.68 | 4835.07 | 4832.29 | 75.82  | 1.6%   |
| 5.88_245.0930m/z  | 245.0930 | 5.88  | 157.0 | 49.40   | 49.13   | 48.87   | 49.06   | 50.45   | 49.36   | 49.38   | 0.51   | 1.0%   |
| 7.80_161.0450m/z  | 161.0450 | 7.80  | 127.5 | 123.79  | 122.06  | 126.56  | 117.23  | 129.66  | 123.56  | 123.81  | 3.84   | 3.1%   |
| 6.67_151.0262m/z  | 151.0262 | 6.67  | 120.3 | 7431.72 | 7316.82 | 7443.40 | 7537.54 | 7377.29 | 7429.09 | 7422.64 | 67.10  | 0.9%   |
| 8.45_167.0210m/z  | 167.0210 | 8.45  | 123.9 | 1002.00 | 1020.78 | 986.64  | 1010.57 | 993.30  | 1002.31 | 1002.60 | 11.07  | 1.1%   |
| 2.26_212.0198m/z  | 212.0198 | 2.26  | 148.6 | 0.00    | 0.00    | 0.00    | 0.00    | 0.00    | 0.00    | 0.00    | 0.00   |        |
| 6.12_218.1031m/z  | 218.1031 | 6.12  | 146.7 | 1212.94 | 1200.60 | 1232.33 | 1188.04 | 1228.08 | 1212.14 | 1212.36 | 15.14  | 1.2%   |
| 1.66_255.2323m/z  | 255.2323 | 1.66  | 173.6 | 7917.23 | 7796.53 | 7886.90 | 8082.47 | 7832.77 | 7915.20 | 7905.19 | 90.43  | 1.1%   |
| 6.38_135.0313m/z  | 135.0313 | 6.38  | 118.5 | 2117.18 | 2067.55 | 2154.12 | 2110.73 | 2121.16 | 2115.90 | 2114.44 | 25.31  | 1.2%   |
| 7.49_150.0415m/z  | 150.0415 | 7.49  | 123.5 | 129.09  | 126.12  | 129.41  | 126.17  | 137.20  | 122.48  | 128.41  | 4.55   | 3.5%   |
| 8.46_177.0403m/z  | 177.0403 | 8.46  | 131.2 | 22.89   | 24.81   | 20.18   | 27.06   | 21.88   | 23.92   | 23.46   | 2.18   | 9.3%   |
| 5.67_295.1384m/z  | 295.1384 | 5.67  | 166.9 | 59.18   | 57.64   | 59.66   | 38.54   | 65.97   | 27.79   | 51.46   | 13.56  | 26.3%  |
| 10.07_191.0195m/z | 191.0195 | 10.07 | 125.6 | 227.55  | 221.15  | 157.46  | 274.75  | 255.26  | 226.73  | 227.15  | 36.40  | 16.0%  |
| 5.90_134.0472m/z  | 134.0472 | 5.90  | 118.6 | 4174.69 | 4061.37 | 4285.83 | 4129.24 | 4185.61 | 4172.11 | 4168.14 | 67.24  | 1.6%   |
| 1.56_121.0293m/z  | 121.0293 | 1.56  | 118.3 | 19.22   | 0.00    | 20.19   | 19.82   | 19.75   | 19.69   | 16.44   | 7.36   | 44.8%  |
| 8.83_306.2357m/z  | 306.2357 | 8.83  | 161.4 | 90.45   | 232.57  | 190.39  | 203.51  | 213.05  | 208.91  | 189.81  | 46.18  | 24.3%  |
| 8.83_361.1353m/z  | 361.1353 | 8.83  | 176.8 | 344.02  | 473.82  | 383.62  | 419.59  | 431.18  | 425.32  | 412.93  | 40.51  | 9.8%   |
| 8.83_164.0712m/z  | 164.0712 | 8.83  | 138.5 | 69.84   | 76.12   | 69.03   | 68.52   | 72.84   | 71.23   | 71.26   | 2.60   | 3.7%   |
| 8.79_413.1679m/z  | 413.1679 | 8.79  | 191.1 | 2427.61 | 2697.24 | 2272.70 | 2425.74 | 2498.25 | 2463.33 | 2464.15 | 125.80 | 5.1%   |
| 8.79_683.3011m/z  | 683.3011 | 8.79  | 248.3 | 0.00    | 78.48   | 78.29   | 81.86   | 78.15   | 79.35   | 66.02   | 29.55  | 44.8%  |
| 8.82_655.2248m/z  | 655.2248 | 8.82  | 224.4 | 0.00    | 23.89   | 19.58   | 27.45   | 23.42   | 24.04   | 19.73   | 9.11   | 46.2%  |
| 8.81_442.1914m/z  | 442.1914 | 8.81  | 201.1 | 126.41  | 146.69  | 124.03  | 137.76  | 131.90  | 134.63  | 133.57  | 7.48   | 5.6%   |
| 8.82_504.2041m/z  | 504.2041 | 8.82  | 165.3 | 123.55  | 141.63  | 132.12  | 129.62  | 130.81  | 133.40  | 131.85  | 5.37   | 4.1%   |
| 8.82_524.2460m/z  | 524.2460 | 8.82  | 217.4 | 755.90  | 797.04  | 735.76  | 749.42  | 760.01  | 757.92  | 759.34  | 18.67  | 2.5%   |
| 8.80_624.2656m/z  | 624.2656 | 8.80  | 236.0 | 93.18   | 177.47  | 149.73  | 157.70  | 160.50  | 160.59  | 149.86  | 26.66  | 17.8%  |

|                  |          |      |       |          |          |          |          |          |          |          |        |       |
|------------------|----------|------|-------|----------|----------|----------|----------|----------|----------|----------|--------|-------|
| 8.81_444.2291m/z | 444.2291 | 8.81 | 166.4 | 631.89   | 653.70   | 668.16   | 582.70   | 661.18   | 640.68   | 639.72   | 28.22  | 4.4%  |
| 8.91_428.1773m/z | 428.1773 | 8.91 | 196.1 | 257.82   | 304.55   | 260.78   | 269.90   | 283.24   | 278.23   | 275.75   | 15.66  | 5.7%  |
| 8.94_551.2456m/z | 551.2456 | 8.94 | 226.1 | 1528.96  | 1668.95  | 1422.64  | 1554.79  | 1532.59  | 1539.74  | 1541.28  | 71.63  | 4.6%  |
| 8.93_468.6872m/z | 468.6872 | 8.93 | 159.3 | 16.32    | 17.38    | 16.20    | 17.25    | 15.58    | 16.62    | 16.56    | 0.62   | 3.7%  |
| 8.78_255.0472m/z | 255.0472 | 8.78 | 150.0 | 659.36   | 732.36   | 587.91   | 653.45   | 676.95   | 662.04   | 662.01   | 42.31  | 6.4%  |
| 8.85_370.5782m/z | 370.5782 | 8.85 | 144.9 | 104.54   | 111.67   | 101.31   | 103.47   | 105.69   | 105.10   | 105.30   | 3.18   | 3.0%  |
| 8.85_541.2246m/z | 541.2246 | 8.85 | 217.1 | 849.28   | 1030.07  | 844.48   | 923.21   | 934.19   | 929.62   | 918.48   | 62.06  | 6.8%  |
| 8.85_444.1731m/z | 444.1731 | 8.85 | 193.9 | 1139.30  | 1373.90  | 1084.84  | 1226.49  | 1244.46  | 1228.70  | 1216.28  | 90.46  | 7.4%  |
| 8.85_259.0916m/z | 259.0916 | 8.85 | 161.5 | 1595.84  | 1342.63  | 1714.89  | 1703.43  | 1552.50  | 1594.77  | 1584.01  | 123.09 | 7.8%  |
| 8.84_342.5655m/z | 342.5655 | 8.84 | 142.4 | 93.54    | 100.28   | 86.88    | 95.18    | 93.38    | 93.73    | 93.83    | 3.92   | 4.2%  |
| 8.87_382.5492m/z | 382.5492 | 8.87 | 143.0 | 2065.07  | 2232.93  | 1921.59  | 2083.49  | 2071.85  | 2071.69  | 2074.44  | 90.06  | 4.3%  |
| 8.89_459.6811m/z | 459.6811 | 8.89 | 159.4 | 232.97   | 245.23   | 224.69   | 230.60   | 235.47   | 233.24   | 233.70   | 6.16   | 2.6%  |
| 8.89_306.0476m/z | 306.0476 | 8.89 | 161.4 | 228.73   | 248.60   | 215.55   | 222.28   | 238.70   | 229.90   | 230.63   | 10.72  | 4.6%  |
| 8.88_302.1340m/z | 302.1340 | 8.88 | 166.6 | 221.20   | 290.13   | 252.82   | 260.16   | 268.93   | 266.63   | 259.98   | 20.77  | 8.0%  |
| 8.87_383.0500m/z | 383.0500 | 8.87 | 141.4 | 370.76   | 398.95   | 352.76   | 364.14   | 378.37   | 372.01   | 372.83   | 14.12  | 3.8%  |
| 8.87_284.1286m/z | 284.1286 | 8.87 | 167.3 | 574.21   | 606.34   | 555.92   | 557.36   | 588.19   | 574.82   | 576.14   | 17.44  | 3.0%  |
| 8.87_245.1140m/z | 245.1140 | 8.87 | 157.0 | 1651.22  | 2494.57  | 2085.09  | 2399.95  | 2179.03  | 2287.61  | 2182.91  | 273.09 | 12.5% |
| 8.75_359.1554m/z | 359.1554 | 8.75 | 182.0 | 115.15   | 244.08   | 206.10   | 215.40   | 225.42   | 221.51   | 204.61   | 41.63  | 20.3% |
| 8.64_315.2027m/z | 315.2027 | 8.64 | 156.1 | 716.16   | 729.25   | 705.41   | 726.16   | 704.35   | 716.48   | 716.30   | 9.37   | 1.3%  |
| 8.64_280.1016m/z | 280.1016 | 8.64 | 157.3 | 79.30    | 80.71    | 79.57    | 78.84    | 78.66    | 79.39    | 79.41    | 0.66   | 0.8%  |
| 8.64_470.1874m/z | 470.1874 | 8.64 | 204.0 | 327.02   | 346.34   | 319.53   | 331.79   | 320.84   | 329.15   | 329.11   | 8.84   | 2.7%  |
| 8.64_376.9654m/z | 376.9654 | 8.64 | 159.5 | 350.58   | 375.43   | 346.90   | 349.57   | 353.45   | 355.15   | 355.18   | 9.44   | 2.7%  |
| 8.64_315.3085m/z | 315.3085 | 8.64 | 156.1 | 173.11   | 178.14   | 166.09   | 180.37   | 167.33   | 173.26   | 173.05   | 5.17   | 3.0%  |
| 8.64_573.2379n   | 572.2321 | 8.64 | 222.1 | 1337.06  | 1437.05  | 1300.11  | 1331.47  | 1340.02  | 1347.89  | 1348.93  | 42.18  | 3.1%  |
| 8.63_315.5429m/z | 315.5429 | 8.63 | 156.1 | 122.73   | 129.62   | 114.33   | 128.02   | 119.63   | 122.92   | 122.88   | 5.09   | 4.1%  |
| 8.64_316.0488n   | 315.0416 | 8.64 | 154.5 | 35051.88 | 35809.06 | 34350.80 | 35524.16 | 34620.95 | 35066.22 | 35070.51 | 495.26 | 1.4%  |
| 8.66_195.0506m/z | 195.0506 | 8.66 | 133.3 | 250.02   | 255.91   | 247.97   | 250.70   | 248.53   | 250.37   | 250.58   | 2.58   | 1.0%  |
| 8.65_588.1086m/z | 588.1086 | 8.65 | 227.3 | 26.67    | 27.81    | 26.33    | 27.44    | 26.17    | 26.91    | 26.89    | 0.58   | 2.2%  |
| 8.65_633.7862m/z | 633.7862 | 8.65 | 185.5 | 213.24   | 228.55   | 203.03   | 217.28   | 213.99   | 214.84   | 215.16   | 7.48   | 3.5%  |

|                  |          |      |       |          |          |          |          |          |          |          |        |       |
|------------------|----------|------|-------|----------|----------|----------|----------|----------|----------|----------|--------|-------|
| 8.62_660.0431m/z | 660.0431 | 8.62 | 220.7 | 0.00     | 374.21   | 381.88   | 369.81   | 388.82   | 378.31   | 315.50   | 141.22 | 44.8% |
| 8.60_504.1757m/z | 504.1757 | 8.60 | 212.4 | 264.87   | 275.67   | 262.25   | 261.04   | 264.11   | 265.30   | 265.54   | 4.76   | 1.8%  |
| 8.59_265.1116n   | 529.2250 | 8.59 | 211.9 | 258.20   | 275.55   | 247.81   | 259.10   | 257.06   | 259.22   | 259.49   | 8.19   | 3.2%  |
| 8.59_589.7485m/z | 589.7485 | 8.59 | 180.9 | 80.19    | 79.11    | 78.24    | 84.36    | 77.44    | 80.22    | 79.93    | 2.22   | 2.8%  |
| 8.60_696.0196m/z | 696.0196 | 8.60 | 227.5 | 0.00     | 115.87   | 126.76   | 98.34    | 126.82   | 117.53   | 97.55    | 44.65  | 45.8% |
| 8.58_344.2738m/z | 344.2738 | 8.58 | 157.0 | 22.97    | 29.81    | 23.18    | 26.62    | 27.11    | 26.58    | 26.04    | 2.37   | 9.1%  |
| 8.58_256.0146m/z | 256.0146 | 8.58 | 151.6 | 21.79    | 24.05    | 17.07    | 25.32    | 18.88    | 21.88    | 21.50    | 2.82   | 13.1% |
| 8.59_345.0015n   | 343.9948 | 8.59 | 155.3 | 16865.89 | 17067.40 | 16776.57 | 17038.94 | 16554.41 | 16872.89 | 16862.68 | 171.04 | 1.0%  |
| 8.57_653.2883m/z | 653.2883 | 8.57 | 237.4 | 86.76    | 93.25    | 79.90    | 95.04    | 75.87    | 87.26    | 86.35    | 6.78   | 7.8%  |
| 8.60_429.1852m/z | 429.1852 | 8.60 | 196.0 | 35.31    | 37.73    | 34.23    | 30.66    | 38.85    | 35.25    | 35.34    | 2.62   | 7.4%  |
| 8.62_551.0378m/z | 551.0378 | 8.62 | 199.0 | 102.86   | 114.73   | 95.26    | 115.59   | 92.95    | 105.59   | 104.50   | 8.66   | 8.3%  |
| 8.61_808.3434m/z | 808.3434 | 8.61 | 261.9 | 0.00     | 77.30    | 77.81    | 73.94    | 83.27    | 77.92    | 65.04    | 29.21  | 44.9% |
| 8.61_454.1921m/z | 454.1921 | 8.61 | 202.6 | 240.13   | 255.84   | 234.31   | 239.84   | 241.91   | 242.02   | 242.34   | 6.56   | 2.7%  |
| 8.61_341.9993m/z | 341.9993 | 8.61 | 157.0 | 771.18   | 780.86   | 773.46   | 769.87   | 759.33   | 771.50   | 771.03   | 6.34   | 0.8%  |
| 8.60_344.1633m/z | 344.1633 | 8.60 | 157.0 | 260.52   | 264.05   | 260.13   | 261.60   | 256.51   | 260.66   | 260.58   | 2.23   | 0.9%  |
| 8.60_669.2827m/z | 669.2827 | 8.60 | 240.9 | 47.37    | 51.23    | 45.55    | 49.95    | 45.89    | 48.16    | 48.03    | 2.05   | 4.3%  |
| 8.62_257.1139m/z | 257.1139 | 8.62 | 154.9 | 646.39   | 656.24   | 654.89   | 625.21   | 651.39   | 646.43   | 646.76   | 10.35  | 1.6%  |
| 8.74_356.1680n   | 355.1607 | 8.74 | 180.4 | 721.65   | 764.86   | 704.56   | 710.54   | 730.32   | 724.63   | 726.09   | 19.36  | 2.7%  |
| 8.73_513.2262m/z | 513.2262 | 8.73 | 214.0 | 57.92    | 77.48    | 75.04    | 68.20    | 74.53    | 73.62    | 71.13    | 6.54   | 9.2%  |
| 8.72_371.1551m/z | 371.1551 | 8.72 | 180.0 | 35.16    | 37.47    | 35.18    | 35.94    | 34.19    | 35.64    | 35.60    | 1.00   | 2.8%  |
| 8.72_399.1500m/z | 399.1500 | 8.72 | 182.7 | 64.88    | 88.10    | 67.82    | 80.06    | 79.04    | 78.51    | 76.40    | 7.83   | 10.2% |
| 8.72_418.1570m/z | 418.1570 | 8.72 | 187.5 | 122.56   | 205.15   | 178.84   | 187.12   | 188.19   | 188.77   | 178.44   | 26.18  | 14.7% |
| 8.72_598.2468m/z | 598.2468 | 8.72 | 223.5 | 808.05   | 949.56   | 808.62   | 873.77   | 861.41   | 869.95   | 861.89   | 47.66  | 5.5%  |
| 8.75_339.9998m/z | 339.9998 | 8.75 | 157.1 | 131.55   | 142.89   | 122.05   | 130.49   | 131.76   | 131.84   | 131.76   | 6.05   | 4.6%  |
| 8.77_556.2349m/z | 556.2349 | 8.77 | 215.0 | 442.49   | 495.26   | 432.32   | 461.76   | 448.31   | 458.08   | 456.37   | 19.92  | 4.4%  |
| 8.77_456.1727m/z | 456.1727 | 8.77 | 193.7 | 541.88   | 671.36   | 529.42   | 603.95   | 602.89   | 600.24   | 591.62   | 46.65  | 7.9%  |
| 8.77_628.2589m/z | 628.2589 | 8.77 | 228.5 | 2665.63  | 3031.37  | 2563.34  | 2796.48  | 2765.01  | 2777.35  | 2766.53  | 142.96 | 5.2%  |
| 8.76_624.2582m/z | 624.2582 | 8.76 | 236.0 | 25.66    | 41.96    | 40.85    | 40.53    | 37.76    | 40.44    | 37.87    | 5.60   | 14.8% |
| 8.68_286.1033m/z | 286.1033 | 8.68 | 157.1 | 234.68   | 257.92   | 227.90   | 229.58   | 244.04   | 238.68   | 238.80   | 10.11  | 4.2%  |

|                  |          |      |       |          |          |          |          |          |          |          |        |       |
|------------------|----------|------|-------|----------|----------|----------|----------|----------|----------|----------|--------|-------|
| 8.67_447.1524m/z | 447.1524 | 8.67 | 197.4 | 52.71    | 61.57    | 49.56    | 58.36    | 55.82    | 56.11    | 55.69    | 3.84   | 6.9%  |
| 8.67_415.1715m/z | 415.1715 | 8.67 | 191.1 | 0.00     | 8.32     | 7.40     | 8.41     | 8.75     | 8.32     | 6.87     | 3.10   | 45.1% |
| 8.71_583.2410m/z | 583.2410 | 8.71 | 221.9 | 0.00     | 11.98    | 9.76     | 13.89    | 11.64    | 12.03    | 9.88     | 4.58   | 46.3% |
| 8.70_514.2157m/z | 514.2157 | 8.70 | 210.4 | 72.04    | 102.29   | 80.18    | 96.39    | 89.51    | 91.96    | 88.73    | 10.04  | 11.3% |
| 8.70_695.3004m/z | 695.3004 | 8.70 | 248.1 | 568.83   | 626.65   | 536.07   | 582.52   | 579.85   | 578.56   | 578.75   | 26.55  | 4.6%  |
| 8.69_232.0932m/z | 232.0932 | 8.69 | 149.3 | 103.90   | 107.15   | 104.88   | 100.27   | 105.21   | 104.11   | 104.25   | 2.07   | 2.0%  |
| 8.69_165.0401m/z | 165.0401 | 8.69 | 125.6 | 214.92   | 222.02   | 216.86   | 209.83   | 216.77   | 215.78   | 216.03   | 3.58   | 1.7%  |
| 9.19_284.0318m/z | 284.0318 | 9.19 | 114.4 | 2609.10  | 2671.71  | 2575.92  | 2568.87  | 2637.05  | 2608.86  | 2611.92  | 35.05  | 1.3%  |
| 9.24_478.0509n   | 513.0234 | 9.24 | 150.4 | 4933.21  | 5812.56  | 5231.51  | 4876.37  | 5060.39  | 5342.30  | 5209.39  | 313.94 | 6.0%  |
| 9.26_164.0111m/z | 164.0111 | 9.26 | 110.2 | 33715.56 | 34524.39 | 33374.87 | 33176.25 | 33979.32 | 33715.76 | 33747.69 | 432.92 | 1.3%  |
| 9.25_349.0122n   | 348.0049 | 9.25 | 131.2 | 6724.83  | 7412.38  | 6594.40  | 6301.33  | 6497.84  | 6811.60  | 6723.73  | 348.36 | 5.2%  |
| 9.25_164.5125m/z | 164.5125 | 9.25 | 110.2 | 3326.41  | 3370.64  | 3295.66  | 3342.83  | 3299.05  | 3326.86  | 3326.91  | 25.56  | 0.8%  |
| 9.01_276.0954n   | 231.0983 | 9.01 | 152.7 | 1093.94  | 1151.69  | 1131.20  | 1097.13  | 1100.75  | 1119.23  | 1115.66  | 20.78  | 1.9%  |
| 9.00_257.0776m/z | 257.0776 | 9.00 | 158.2 | 812.95   | 930.83   | 792.26   | 813.76   | 864.75   | 847.04   | 843.60   | 45.71  | 5.4%  |
| 9.01_300.1212m/z | 300.1212 | 9.01 | 166.7 | 0.00     | 1.74     | 1.91     | 1.22     | 2.01     | 1.75     | 1.44     | 0.69   | 48.0% |
| 9.04_243.0178m/z | 243.0178 | 9.04 | 140.7 | 1506.76  | 1639.62  | 1381.36  | 1471.80  | 1558.76  | 1509.35  | 1511.27  | 78.73  | 5.2%  |
| 9.05_215.0671m/z | 215.0671 | 9.05 | 140.3 | 457.02   | 480.02   | 459.34   | 425.19   | 470.61   | 457.65   | 458.30   | 16.95  | 3.7%  |
| 8.54_242.0795m/z | 242.0795 | 8.54 | 153.8 | 1074.25  | 1117.52  | 1066.17  | 1051.85  | 1077.71  | 1075.91  | 1077.24  | 20.00  | 1.9%  |
| 7.81_397.2072m/z | 397.2072 | 7.81 | 191.5 | 2052.15  | 2022.04  | 2063.67  | 2093.94  | 2005.50  | 2052.10  | 2048.23  | 28.49  | 1.4%  |
| 7.81_412.1830m/z | 412.1830 | 7.81 | 191.1 | 38.16    | 35.27    | 38.77    | 40.12    | 36.81    | 38.15    | 37.88    | 1.52   | 4.0%  |
| 7.81_341.1817m/z | 341.1817 | 7.81 | 179.1 | 106.80   | 104.60   | 102.35   | 118.04   | 95.92    | 106.92   | 105.77   | 6.62   | 6.3%  |
| 7.81_462.1981m/z | 462.1981 | 7.81 | 202.4 | 306.34   | 303.95   | 300.26   | 315.75   | 303.42   | 306.25   | 305.99   | 4.81   | 1.6%  |
| 7.80_334.1403m/z | 334.1403 | 7.80 | 179.3 | 2398.93  | 2391.08  | 2390.64  | 2433.81  | 2367.13  | 2398.76  | 2396.73  | 19.70  | 0.8%  |
| 7.83_186.0632n   | 185.0565 | 7.83 | 140.4 | 856.96   | 838.16   | 872.29   | 839.18   | 875.57   | 856.03   | 856.36   | 14.43  | 1.7%  |
| 7.83_415.2122m/z | 415.2122 | 7.83 | 203.5 | 9.58     | 9.71     | 9.20     | 10.38    | 8.62     | 9.59     | 9.51     | 0.53   | 5.6%  |
| 7.83_442.2127m/z | 442.2127 | 7.83 | 199.3 | 21.87    | 21.15    | 23.77    | 20.24    | 21.32    | 21.87    | 21.70    | 1.07   | 4.9%  |
| 7.83_605.2558m/z | 605.2558 | 7.83 | 228.9 | 201.06   | 197.35   | 201.30   | 202.37   | 202.67   | 200.87   | 200.94   | 1.74   | 0.9%  |
| 7.83_395.1563m/z | 395.1563 | 7.83 | 189.8 | 839.46   | 830.83   | 846.53   | 830.32   | 849.28   | 838.86   | 839.21   | 7.12   | 0.8%  |
| 7.83_270.1454m/z | 270.1454 | 7.83 | 164.4 | 598.52   | 584.84   | 607.88   | 601.36   | 594.36   | 598.28   | 597.54   | 7.00   | 1.2%  |



|                  |          |      |       |         |         |         |         |         |         |         |       |       |
|------------------|----------|------|-------|---------|---------|---------|---------|---------|---------|---------|-------|-------|
| 7.82_221.0925m/z | 221.0925 | 7.82 | 151.5 | 199.01  | 195.13  | 200.75  | 199.59  | 199.53  | 198.88  | 198.82  | 1.75  | 0.9%  |
| 7.76_243.1349m/z | 243.1349 | 7.76 | 158.8 | 4725.39 | 4697.71 | 4765.79 | 4665.84 | 4771.90 | 4722.49 | 4724.85 | 36.78 | 0.8%  |
| 7.76_371.1885m/z | 371.1885 | 7.76 | 188.7 | 155.63  | 149.36  | 147.60  | 177.32  | 136.97  | 155.77  | 153.78  | 12.26 | 8.0%  |
| 7.76_703.3052m/z | 703.3052 | 7.76 | 246.1 | 1181.59 | 1170.18 | 1167.88 | 1222.53 | 1152.57 | 1181.64 | 1179.40 | 21.63 | 1.8%  |
| 7.79_640.2936m/z | 640.2936 | 7.79 | 235.8 | 222.33  | 215.05  | 227.81  | 214.76  | 232.19  | 221.71  | 222.31  | 6.30  | 2.8%  |
| 7.79_274.1397m/z | 274.1397 | 7.79 | 164.2 | 205.15  | 201.02  | 205.81  | 199.60  | 215.64  | 204.51  | 205.29  | 5.14  | 2.5%  |
| 7.78_483.1887m/z | 483.1887 | 7.78 | 196.7 | 7.85    | 6.89    | 8.91    | 6.52    | 8.60    | 7.71    | 7.75    | 0.85  | 11.0% |
| 7.78_458.2251m/z | 458.2251 | 7.78 | 204.3 | 998.47  | 980.58  | 1007.41 | 1003.83 | 995.38  | 998.03  | 997.28  | 8.47  | 0.8%  |
| 7.81_601.2697n   | 582.2537 | 7.81 | 223.7 | 1765.59 | 1748.66 | 1791.02 | 1706.01 | 1825.79 | 1762.84 | 1766.65 | 36.76 | 2.1%  |
| 7.95_667.3050m/z | 667.3050 | 7.95 | 241.0 | 523.42  | 520.23  | 527.74  | 515.05  | 530.99  | 523.04  | 523.41  | 5.10  | 1.0%  |
| 7.94_315.1655m/z | 315.1655 | 7.94 | 173.0 | 30.67   | 29.91   | 30.28   | 32.09   | 29.87   | 30.67   | 30.58   | 0.75  | 2.4%  |
| 7.93_965.4613m/z | 965.4613 | 7.93 | 289.4 | 97.30   | 98.15   | 99.66   | 85.52   | 106.28  | 96.90   | 97.30   | 6.14  | 6.3%  |
| 7.93_567.2449m/z | 567.2449 | 7.93 | 222.1 | 50.93   | 46.47   | 55.84   | 44.85   | 55.45   | 50.65   | 50.70   | 4.11  | 8.1%  |
| 7.93_185.0215m/z | 185.0215 | 7.93 | 132.3 | 64.92   | 63.87   | 64.91   | 65.37   | 65.29   | 64.87   | 64.87   | 0.49  | 0.8%  |
| 7.93_371.1917m/z | 371.1917 | 7.93 | 186.9 | 701.05  | 698.91  | 705.51  | 678.57  | 724.95  | 700.09  | 701.51  | 13.54 | 1.9%  |
| 7.93_227.0667m/z | 227.0667 | 7.93 | 149.5 | 219.43  | 213.77  | 222.63  | 219.22  | 220.62  | 219.26  | 219.16  | 2.69  | 1.2%  |
| 7.96_391.1624m/z | 391.1624 | 7.96 | 191.7 | 210.44  | 208.52  | 207.70  | 219.67  | 202.40  | 210.50  | 209.87  | 5.15  | 2.5%  |
| 7.99_273.1075m/z | 273.1075 | 7.99 | 164.3 | 39.65   | 39.08   | 40.98   | 38.19   | 39.93   | 39.62   | 39.57   | 0.84  | 2.1%  |
| 7.99_426.1626m/z | 426.1626 | 7.99 | 189.1 | 291.01  | 285.30  | 293.22  | 292.00  | 292.01  | 290.81  | 290.72  | 2.55  | 0.9%  |
| 7.98_543.2387m/z | 543.2387 | 7.98 | 215.3 | 44.06   | 44.62   | 44.06   | 42.14   | 45.90   | 44.00   | 44.13   | 1.11  | 2.5%  |
| 7.98_784.3534m/z | 784.3534 | 7.98 | 256.4 | 40.68   | 38.82   | 40.65   | 42.81   | 39.10   | 40.68   | 40.46   | 1.30  | 3.2%  |
| 7.98_678.2935m/z | 678.2935 | 7.98 | 188.4 | 196.82  | 192.84  | 195.27  | 207.28  | 186.94  | 196.90  | 196.01  | 6.07  | 3.1%  |
| 7.97_483.1822m/z | 483.1822 | 7.97 | 198.4 | 30.97   | 27.93   | 32.02   | 31.66   | 31.00   | 30.91   | 30.75   | 1.32  | 4.3%  |
| 7.97_784.3413m/z | 784.3413 | 7.97 | 260.3 | 54.30   | 51.94   | 53.65   | 59.40   | 49.17   | 54.35   | 53.80   | 3.08  | 5.7%  |
| 7.96_438.1955m/z | 438.1955 | 7.96 | 202.9 | 26.53   | 25.50   | 26.88   | 26.40   | 27.14   | 26.49   | 26.49   | 0.51  | 1.9%  |
| 7.96_456.2094m/z | 456.2094 | 7.96 | 202.5 | 300.34  | 294.57  | 302.25  | 300.52  | 303.04  | 300.10  | 300.14  | 2.71  | 0.9%  |
| 7.88_499.2512m/z | 499.2512 | 7.88 | 210.6 | 648.23  | 636.31  | 652.81  | 648.58  | 653.06  | 647.71  | 647.78  | 5.56  | 0.9%  |
| 7.87_676.2910m/z | 676.2910 | 7.87 | 237.1 | 76.72   | 71.72   | 80.83   | 74.18   | 79.33   | 76.54   | 76.56   | 3.03  | 4.0%  |
| 7.87_613.2945m/z | 613.2945 | 7.87 | 228.7 | 1311.60 | 1292.09 | 1307.79 | 1352.53 | 1277.13 | 1311.63 | 1308.80 | 23.14 | 1.8%  |

|                  |          |      |       |         |         |         |         |         |         |         |       |       |
|------------------|----------|------|-------|---------|---------|---------|---------|---------|---------|---------|-------|-------|
| 7.87_454.2299m/z | 454.2299 | 7.87 | 202.6 | 1330.82 | 1312.77 | 1344.41 | 1328.87 | 1331.17 | 1330.17 | 1329.70 | 9.20  | 0.7%  |
| 7.87_428.2145m/z | 428.2145 | 7.87 | 197.8 | 2526.98 | 2474.63 | 2544.99 | 2557.82 | 2509.02 | 2525.96 | 2523.23 | 26.63 | 1.1%  |
| 7.86_219.0762m/z | 219.0762 | 7.86 | 148.3 | 36.30   | 36.22   | 35.39   | 36.77   | 36.84   | 36.27   | 36.30   | 0.47  | 1.3%  |
| 7.86_632.2687m/z | 632.2687 | 7.86 | 235.9 | 796.93  | 786.87  | 798.54  | 793.48  | 809.45  | 796.12  | 796.90  | 6.75  | 0.8%  |
| 7.86_779.8748m/z | 779.8748 | 7.86 | 208.3 | 396.94  | 380.14  | 391.56  | 434.84  | 361.93  | 397.19  | 393.76  | 22.03 | 5.6%  |
| 7.86_714.3135m/z | 714.3135 | 7.86 | 194.9 | 107.09  | 105.37  | 104.91  | 115.42  | 98.45   | 107.18  | 106.40  | 4.98  | 4.7%  |
| 7.92_275.1105n   | 256.0931 | 7.92 | 159.9 | 263.33  | 255.17  | 274.59  | 245.61  | 277.05  | 262.76  | 263.09  | 10.76 | 4.1%  |
| 7.92_401.2036m/z | 401.2036 | 7.92 | 194.9 | 529.80  | 520.63  | 548.35  | 507.88  | 539.24  | 529.34  | 529.21  | 12.88 | 2.4%  |
| 7.91_681.3195m/z | 681.3195 | 7.91 | 246.4 | 110.33  | 107.98  | 113.94  | 103.04  | 117.23  | 109.89  | 110.40  | 4.46  | 4.0%  |
| 7.91_464.2241m/z | 464.2241 | 7.91 | 213.2 | 39.53   | 36.33   | 43.75   | 35.04   | 41.43   | 39.44   | 39.25   | 2.92  | 7.5%  |
| 7.91_713.8125m/z | 713.8125 | 7.91 | 194.9 | 671.36  | 664.56  | 667.94  | 680.88  | 669.11  | 671.10  | 670.83  | 5.03  | 0.8%  |
| 7.90_681.3223m/z | 681.3223 | 7.90 | 246.4 | 27.67   | 24.58   | 30.51   | 27.42   | 26.43   | 27.66   | 27.38   | 1.77  | 6.4%  |
| 7.90_358.1943m/z | 358.1943 | 7.90 | 187.3 | 37.94   | 36.82   | 41.00   | 29.97   | 42.73   | 37.67   | 37.69   | 4.02  | 10.7% |
| 7.90_337.0430m/z | 337.0430 | 7.90 | 165.5 | 25.98   | 23.53   | 28.00   | 24.12   | 27.38   | 25.91   | 25.82   | 1.60  | 6.2%  |
| 7.90_611.2798m/z | 611.2798 | 7.90 | 230.6 | 528.78  | 528.87  | 531.21  | 503.83  | 557.00  | 527.53  | 529.54  | 15.40 | 2.9%  |
| 7.90_241.0827m/z | 241.0827 | 7.90 | 152.2 | 490.95  | 488.78  | 497.02  | 475.70  | 503.80  | 490.46  | 491.12  | 8.56  | 1.7%  |
| 7.74_258.1450m/z | 258.1450 | 7.74 | 163.2 | 466.54  | 462.01  | 469.28  | 470.78  | 460.80  | 466.47  | 465.98  | 3.58  | 0.8%  |
| 7.56_529.2611m/z | 529.2611 | 7.56 | 217.3 | 584.32  | 591.49  | 572.09  | 590.27  | 584.49  | 584.13  | 584.46  | 6.27  | 1.1%  |
| 7.60_649.7851m/z | 649.7851 | 7.60 | 185.3 | 2145.12 | 2116.99 | 2142.79 | 2196.89 | 2101.53 | 2144.96 | 2141.38 | 29.70 | 1.4%  |
| 7.59_582.2866m/z | 582.2866 | 7.59 | 223.7 | 4513.27 | 4512.89 | 4465.39 | 4630.19 | 4406.46 | 4513.90 | 4507.02 | 67.25 | 1.5%  |
| 7.57_586.2821m/z | 586.2821 | 7.57 | 223.7 | 194.99  | 192.14  | 192.78  | 208.39  | 179.18  | 195.16  | 193.77  | 8.50  | 4.4%  |
| 7.52_369.1411m/z | 369.1411 | 7.52 | 183.5 | 823.05  | 821.97  | 818.55  | 830.72  | 818.88  | 822.84  | 822.67  | 4.02  | 0.5%  |
| 7.49_958.4282m/z | 958.4282 | 7.49 | 287.5 | 331.87  | 334.61  | 312.11  | 347.55  | 331.09  | 331.74  | 331.50  | 10.36 | 3.1%  |
| 7.52_650.2865m/z | 650.2865 | 7.52 | 185.3 | 1166.42 | 1167.71 | 1142.63 | 1174.65 | 1189.10 | 1164.62 | 1167.52 | 13.82 | 1.2%  |
| 7.55_315.1667m/z | 315.1667 | 7.55 | 173.0 | 529.51  | 525.41  | 522.49  | 541.81  | 526.18  | 529.26  | 529.11  | 6.16  | 1.2%  |
| 7.55_555.2777m/z | 555.2777 | 7.55 | 224.2 | 1701.01 | 1707.98 | 1644.72 | 1771.16 | 1667.53 | 1701.12 | 1698.92 | 39.23 | 2.3%  |
| 7.55_241.0829m/z | 241.0829 | 7.55 | 152.2 | 2147.83 | 2119.02 | 2185.50 | 2113.79 | 2165.76 | 2146.44 | 2146.39 | 24.90 | 1.2%  |
| 7.54_426.1626m/z | 426.1626 | 7.54 | 192.6 | 1090.46 | 1099.58 | 1064.66 | 1089.90 | 1119.45 | 1088.54 | 1092.10 | 16.21 | 1.5%  |
| 7.54_653.3262m/z | 653.3262 | 7.54 | 237.4 | 2712.42 | 2697.19 | 2684.97 | 2806.43 | 2627.72 | 2712.97 | 2706.95 | 52.94 | 2.0%  |

|                  |          |      |       |         |         |         |         |         |         |         |        |       |
|------------------|----------|------|-------|---------|---------|---------|---------|---------|---------|---------|--------|-------|
| 7.53_197.0926m/z | 197.0926 | 7.53 | 141.3 | 14.29   | 12.60   | 15.18   | 14.53   | 14.12   | 0.00    | 11.79   | 5.33   | 45.2% |
| 7.52_683.3351m/z | 683.3351 | 7.52 | 244.5 | 926.73  | 914.44  | 921.27  | 954.68  | 905.72  | 926.68  | 924.92  | 15.19  | 1.6%  |
| 7.60_728.1511m/z | 728.1511 | 7.60 | 247.7 | 161.46  | 165.33  | 164.66  | 149.58  | 161.24  | 0.00    | 133.71  | 60.02  | 44.9% |
| 7.71_288.1549m/z | 288.1549 | 7.71 | 170.5 | 196.58  | 190.64  | 201.59  | 191.28  | 202.16  | 196.27  | 196.42  | 4.46   | 2.3%  |
| 7.71_488.2135m/z | 488.2135 | 7.71 | 210.9 | 269.47  | 267.34  | 272.95  | 263.21  | 275.10  | 269.17  | 269.54  | 3.82   | 1.4%  |
| 7.71_606.7608m/z | 606.7608 | 7.71 | 182.4 | 964.14  | 962.37  | 945.79  | 979.68  | 968.55  | 963.58  | 964.02  | 10.01  | 1.0%  |
| 7.70_614.7665m/z | 614.7665 | 7.70 | 180.6 | 230.91  | 224.08  | 229.32  | 241.60  | 223.48  | 230.89  | 230.05  | 5.98   | 2.6%  |
| 7.70_477.1722m/z | 477.1722 | 7.70 | 202.1 | 430.72  | 432.39  | 427.03  | 433.41  | 429.77  | 430.62  | 430.66  | 2.02   | 0.5%  |
| 7.69_408.0887m/z | 408.0887 | 7.69 | 203.7 | 227.51  | 216.02  | 231.98  | 225.15  | 244.61  | 226.76  | 228.67  | 8.59   | 3.8%  |
| 7.72_452.1782m/z | 452.1782 | 7.72 | 195.5 | 700.50  | 697.41  | 694.53  | 706.57  | 702.55  | 700.16  | 700.29  | 3.79   | 0.5%  |
| 7.71_667.2680m/z | 667.2680 | 7.71 | 237.2 | 348.10  | 348.23  | 341.05  | 346.61  | 359.26  | 347.52  | 348.46  | 5.42   | 1.6%  |
| 7.60_319.0761m/z | 319.0761 | 7.60 | 183.2 | 7.75    | 6.69    | 8.81    | 0.00    | 8.12    | 0.00    | 5.23    | 3.75   | 71.7% |
| 7.67_614.2658m/z | 614.2658 | 7.67 | 180.6 | 641.41  | 632.77  | 640.52  | 653.22  | 634.24  | 641.24  | 640.57  | 6.61   | 1.0%  |
| 7.66_327.1666m/z | 327.1666 | 7.66 | 172.6 | 755.81  | 745.92  | 755.10  | 769.82  | 746.61  | 755.63  | 754.82  | 7.89   | 1.0%  |
| 7.66_590.2577m/z | 590.2577 | 7.66 | 225.4 | 1272.49 | 1276.45 | 1248.79 | 1301.70 | 1258.09 | 1272.39 | 1271.65 | 16.50  | 1.3%  |
| 8.00_541.2553m/z | 541.2553 | 8.00 | 222.6 | 20.73   | 20.41   | 21.56   | 18.99   | 22.03   | 20.67   | 20.73   | 0.96   | 4.6%  |
| 8.37_520.2046m/z | 520.2046 | 8.37 | 217.5 | 1692.18 | 1761.49 | 1679.29 | 1659.63 | 1688.13 | 1694.67 | 1695.90 | 31.54  | 1.9%  |
| 8.36_373.1753m/z | 373.1753 | 8.36 | 186.9 | 0.00    | 12.07   | 12.76   | 10.99   | 13.04   | 12.22   | 10.18   | 4.60   | 45.2% |
| 8.36_359.1570m/z | 359.1570 | 8.36 | 178.6 | 40.03   | 40.84   | 41.53   | 38.68   | 40.86   | 40.41   | 40.39   | 0.89   | 2.2%  |
| 8.36_548.0988m/z | 548.0988 | 8.36 | 215.2 | 25.50   | 25.14   | 27.82   | 24.25   | 25.83   | 25.92   | 25.75   | 1.08   | 4.2%  |
| 8.36_543.2387m/z | 543.2387 | 8.36 | 218.9 | 157.51  | 166.83  | 154.95  | 156.07  | 157.94  | 158.47  | 158.63  | 3.85   | 2.4%  |
| 8.36_796.3456m/z | 796.3456 | 8.36 | 264.0 | 534.44  | 576.41  | 540.60  | 535.13  | 548.44  | 548.03  | 547.17  | 14.19  | 2.6%  |
| 8.36_486.2204m/z | 486.2204 | 8.36 | 210.9 | 7584.07 | 7854.57 | 7458.17 | 7580.39 | 7523.02 | 7593.06 | 7598.88 | 123.51 | 1.6%  |
| 8.35_627.2730m/z | 627.2730 | 8.35 | 230.4 | 134.05  | 142.07  | 131.24  | 132.89  | 134.93  | 134.80  | 135.00  | 3.40   | 2.5%  |
| 8.35_399.1873m/z | 399.1873 | 8.35 | 193.2 | 74.11   | 79.09   | 72.98   | 74.35   | 70.95   | 74.65   | 74.36   | 2.45   | 3.3%  |
| 8.35_299.1349m/z | 299.1349 | 8.35 | 165.0 | 105.25  | 107.72  | 106.90  | 103.26  | 103.19  | 105.42  | 105.29  | 1.68   | 1.6%  |
| 8.34_415.1826m/z | 415.1826 | 8.34 | 192.8 | 92.37   | 96.93   | 94.06   | 85.71   | 96.26   | 92.91   | 93.04   | 3.67   | 3.9%  |
| 8.34_300.1536m/z | 300.1536 | 8.34 | 170.1 | 177.30  | 180.28  | 180.84  | 171.86  | 176.44  | 177.42  | 177.36  | 2.94   | 1.7%  |
| 8.34_430.1941m/z | 430.1941 | 8.34 | 197.8 | 285.71  | 304.38  | 283.29  | 278.83  | 290.94  | 288.26  | 288.57  | 8.03   | 2.8%  |

|                  |          |      |       |         |         |         |         |         |         |         |       |       |
|------------------|----------|------|-------|---------|---------|---------|---------|---------|---------|---------|-------|-------|
| 8.37_566.2570m/z | 566.2570 | 8.37 | 224.0 | 767.18  | 794.85  | 758.90  | 760.31  | 761.99  | 768.06  | 768.55  | 12.23 | 1.6%  |
| 8.42_302.1352m/z | 302.1352 | 8.42 | 168.3 | 531.85  | 571.50  | 511.16  | 531.20  | 536.02  | 535.33  | 536.18  | 17.88 | 3.3%  |
| 8.42_577.2276m/z | 577.2276 | 8.42 | 222.0 | 1178.40 | 1227.88 | 1151.83 | 1187.57 | 1160.04 | 1180.48 | 1181.03 | 24.29 | 2.1%  |
| 8.41_392.5753n   | 784.1496 | 8.41 | 239.4 | 1180.82 | 1249.11 | 1143.21 | 1193.00 | 1169.35 | 1185.77 | 1186.88 | 32.05 | 2.7%  |
| 8.41_432.5752m/z | 432.5752 | 8.41 | 150.1 | 447.00  | 463.04  | 437.61  | 448.17  | 443.28  | 447.42  | 447.75  | 7.72  | 1.7%  |
| 8.40_476.7443m/z | 476.7443 | 8.40 | 162.4 | 25.55   | 24.55   | 26.84   | 25.26   | 24.94   | 25.56   | 25.45   | 0.71  | 2.8%  |
| 8.39_788.3242m/z | 788.3242 | 8.39 | 266.0 | 15.05   | 20.25   | 19.80   | 18.15   | 20.37   | 19.52   | 18.86   | 1.85  | 9.8%  |
| 8.39_304.0319m/z | 304.0319 | 8.39 | 161.5 | 55.49   | 54.54   | 57.15   | 54.98   | 54.83   | 55.49   | 55.41   | 0.85  | 1.5%  |
| 8.39_386.1649m/z | 386.1649 | 8.39 | 184.8 | 78.66   | 81.42   | 75.43   | 81.48   | 76.43   | 78.74   | 78.69   | 2.27  | 2.9%  |
| 8.39_699.2949m/z | 699.2949 | 8.39 | 246.2 | 660.20  | 690.51  | 650.60  | 658.35  | 653.11  | 662.04  | 662.47  | 13.15 | 2.0%  |
| 8.37_330.1657m/z | 330.1657 | 8.37 | 181.1 | 353.78  | 389.53  | 351.98  | 357.71  | 364.32  | 364.40  | 363.62  | 12.52 | 3.4%  |
| 8.37_302.1352m/z | 302.1352 | 8.37 | 168.3 | 133.81  | 141.80  | 130.78  | 130.57  | 134.04  | 134.10  | 134.18  | 3.71  | 2.8%  |
| 8.42_242.1105m/z | 242.1105 | 8.42 | 157.2 | 8.34    | 8.76    | 8.03    | 8.28    | 8.39    | 8.35    | 8.36    | 0.21  | 2.6%  |
| 8.31_600.2712m/z | 600.2712 | 8.31 | 180.8 | 214.18  | 218.24  | 214.00  | 217.28  | 205.67  | 214.42  | 213.96  | 4.05  | 1.9%  |
| 8.30_463.1829m/z | 463.1829 | 8.30 | 202.4 | 12.76   | 13.50   | 12.62   | 12.13   | 12.95   | 12.78   | 12.79   | 0.41  | 3.2%  |
| 8.30_510.2521m/z | 510.2521 | 8.30 | 221.4 | 50.58   | 52.23   | 52.19   | 46.42   | 51.16   | 50.64   | 50.54   | 1.95  | 3.9%  |
| 8.30_495.1832m/z | 495.1832 | 8.30 | 207.1 | 93.52   | 99.58   | 90.13   | 93.91   | 92.16   | 93.83   | 93.85   | 2.87  | 3.1%  |
| 8.30_637.3091m/z | 637.3091 | 8.30 | 183.7 | 369.78  | 374.43  | 369.48  | 368.04  | 367.81  | 369.84  | 369.90  | 2.18  | 0.6%  |
| 8.29_822.1355m/z | 822.1355 | 8.29 | 259.8 | 0.00    | 20.41   | 19.38   | 21.73   | 20.17   | 20.54   | 17.04   | 7.65  | 44.9% |
| 8.29_392.1663m/z | 392.1663 | 8.29 | 188.1 | 43.08   | 44.17   | 43.55   | 43.09   | 41.44   | 43.17   | 43.08   | 0.83  | 1.9%  |
| 8.31_746.7861m/z | 746.7861 | 8.31 | 196.3 | 45.21   | 45.37   | 45.50   | 46.49   | 42.48   | 45.29   | 45.06   | 1.23  | 2.7%  |
| 8.33_844.8618m/z | 844.8618 | 8.33 | 214.8 | 44.39   | 45.80   | 45.75   | 39.96   | 46.40   | 44.42   | 44.45   | 2.14  | 4.8%  |
| 8.33_517.2260m/z | 517.2260 | 8.33 | 210.3 | 1175.29 | 1226.55 | 1162.59 | 1165.52 | 1167.09 | 1178.38 | 1179.24 | 21.86 | 1.9%  |
| 8.32_713.3059m/z | 713.3059 | 8.32 | 240.3 | 0.00    | 5.28    | 5.62    | 5.32    | 5.19    | 5.37    | 4.46    | 2.00  | 44.8% |
| 8.32_611.1308m/z | 611.1308 | 8.32 | 230.6 | 14.09   | 14.47   | 14.64   | 12.07   | 15.01   | 14.08   | 14.06   | 0.94  | 6.7%  |
| 8.32_251.0771m/z | 251.0771 | 8.32 | 146.9 | 29.91   | 32.42   | 28.58   | 30.48   | 29.64   | 30.21   | 30.21   | 1.16  | 3.8%  |
| 8.32_444.2291m/z | 444.2291 | 8.32 | 166.4 | 993.48  | 1057.70 | 969.84  | 938.42  | 1020.67 | 994.85  | 995.83  | 37.47 | 3.8%  |
| 8.32_356.1836m/z | 356.1836 | 8.32 | 178.6 | 1.92    | 2.17    | 1.68    | 2.20    | 1.53    | 1.96    | 1.91    | 0.24  | 12.7% |
| 8.32_564.2342m/z | 564.2342 | 8.32 | 169.4 | 17.90   | 19.50   | 17.08   | 16.70   | 18.77   | 17.96   | 17.99   | 0.95  | 5.3%  |

|                  |          |      |       |         |         |         |         |         |         |         |       |       |
|------------------|----------|------|-------|---------|---------|---------|---------|---------|---------|---------|-------|-------|
| 8.32_509.2342m/z | 509.2342 | 8.32 | 215.9 | 107.20  | 105.54  | 112.09  | 103.06  | 106.80  | 107.18  | 106.98  | 2.70  | 2.5%  |
| 8.32_749.3574m/z | 749.3574 | 8.32 | 260.7 | 818.34  | 837.00  | 803.17  | 829.89  | 804.57  | 818.78  | 818.62  | 12.25 | 1.5%  |
| 8.31_325.1498m/z | 325.1498 | 8.31 | 174.4 | 5.78    | 5.09    | 6.51    | 5.28    | 5.79    | 5.77    | 5.70    | 0.45  | 7.9%  |
| 8.29_559.2349m/z | 559.2349 | 8.29 | 222.3 | 454.42  | 464.39  | 454.18  | 447.44  | 456.20  | 454.69  | 455.22  | 4.96  | 1.1%  |
| 8.53_586.2463m/z | 586.2463 | 8.53 | 223.7 | 48.50   | 53.00   | 49.25   | 47.71   | 50.81   | 49.98   | 49.88   | 1.72  | 3.4%  |
| 8.53_865.3691m/z | 865.3691 | 8.53 | 272.8 | 1378.78 | 1475.84 | 1345.06 | 1409.20 | 1365.00 | 1395.76 | 1394.94 | 41.62 | 3.0%  |
| 8.52_685.2708m/z | 685.2708 | 8.52 | 237.0 | 23.03   | 28.85   | 25.34   | 27.79   | 25.85   | 26.92   | 26.30   | 1.87  | 7.1%  |
| 8.52_713.3136m/z | 713.3136 | 8.52 | 244.1 | 55.13   | 65.69   | 45.94   | 60.59   | 56.53   | 57.48   | 56.89   | 5.98  | 10.5% |
| 8.52_489.1936m/z | 489.1936 | 8.52 | 200.1 | 251.62  | 255.53  | 252.59  | 255.54  | 242.93  | 252.14  | 251.73  | 4.23  | 1.7%  |
| 8.51_185.0921m/z | 185.0921 | 8.51 | 143.6 | 36.10   | 35.09   | 37.59   | 34.66   | 36.73   | 36.07   | 36.04   | 0.97  | 2.7%  |
| 8.51_399.1491m/z | 399.1491 | 8.51 | 184.5 | 89.50   | 93.75   | 90.84   | 88.59   | 91.55   | 90.83   | 90.84   | 1.62  | 1.8%  |
| 8.51_753.3413m/z | 753.3413 | 8.51 | 253.0 | 836.69  | 877.97  | 817.41  | 843.94  | 826.00  | 839.76  | 840.30  | 19.04 | 2.3%  |
| 8.50_371.1548m/z | 371.1548 | 8.50 | 183.4 | 9.41    | 9.80    | 9.49    | 9.15    | 9.54    | 9.46    | 9.47    | 0.19  | 2.0%  |
| 8.50_359.1525m/z | 359.1525 | 8.50 | 180.3 | 49.40   | 51.62   | 47.48   | 50.39   | 48.78   | 49.48   | 49.53   | 1.28  | 2.6%  |
| 8.50_638.2769m/z | 638.2769 | 8.50 | 187.2 | 1079.86 | 1116.47 | 1047.84 | 1108.13 | 1056.98 | 1081.52 | 1081.80 | 24.73 | 2.3%  |
| 8.57_752.8215m/z | 752.8215 | 8.57 | 198.0 | 24.10   | 26.85   | 20.86   | 26.23   | 22.64   | 24.31   | 24.17   | 2.03  | 8.4%  |
| 8.56_346.2253m/z | 346.2253 | 8.56 | 172.1 | 78.27   | 90.21   | 83.54   | 80.29   | 88.21   | 84.96   | 84.25   | 4.16  | 4.9%  |
| 8.56_359.1537m/z | 359.1537 | 8.56 | 178.6 | 22.97   | 23.92   | 23.73   | 20.67   | 23.31   | 23.01   | 22.93   | 1.07  | 4.7%  |
| 8.56_752.3189m/z | 752.3189 | 8.56 | 194.5 | 111.65  | 120.70  | 110.53  | 107.83  | 117.62  | 113.42  | 113.62  | 4.34  | 3.8%  |
| 8.47_403.5544m/z | 403.5544 | 8.47 | 145.8 | 1037.37 | 1061.02 | 1023.70 | 1034.88 | 1035.23 | 1037.61 | 1038.30 | 11.20 | 1.1%  |
| 8.46_357.1396m/z | 357.1396 | 8.46 | 176.9 | 109.85  | 117.76  | 106.77  | 111.40  | 107.09  | 110.69  | 110.60  | 3.64  | 3.3%  |
| 8.46_541.2254m/z | 541.2254 | 8.46 | 217.1 | 338.85  | 360.61  | 330.77  | 340.13  | 336.83  | 341.12  | 341.39  | 9.23  | 2.7%  |
| 8.46_940.3639m/z | 940.3639 | 8.46 | 281.8 | 436.83  | 548.69  | 508.98  | 498.54  | 513.28  | 515.89  | 503.70  | 33.64 | 6.7%  |
| 8.46_463.1825m/z | 463.1825 | 8.46 | 200.6 | 426.71  | 443.89  | 416.67  | 429.67  | 422.24  | 427.39  | 427.76  | 8.35  | 2.0%  |
| 8.46_245.0431m/z | 245.0431 | 8.46 | 147.1 | 657.56  | 673.61  | 650.65  | 650.41  | 661.21  | 657.72  | 658.53  | 7.79  | 1.2%  |
| 8.45_404.0554m/z | 404.0554 | 8.45 | 145.8 | 239.81  | 250.86  | 232.19  | 243.11  | 235.09  | 240.18  | 240.21  | 5.95  | 2.5%  |
| 8.45_458.1120n   | 413.1149 | 8.45 | 189.4 | 234.83  | 256.87  | 243.65  | 236.12  | 248.97  | 245.15  | 244.26  | 7.50  | 3.1%  |
| 8.44_616.2567m/z | 616.2567 | 8.44 | 226.9 | 298.32  | 318.31  | 287.84  | 296.38  | 302.32  | 299.85  | 300.50  | 9.16  | 3.0%  |
| 8.43_360.1678m/z | 360.1678 | 8.43 | 182.0 | 0.00    | 6.21    | 6.20    | 6.84    | 5.50    | 6.30    | 5.18    | 2.35  | 45.3% |

|                  |          |      |       |         |         |         |         |         |         |         |       |      |
|------------------|----------|------|-------|---------|---------|---------|---------|---------|---------|---------|-------|------|
| 8.47_468.1736m/z | 468.1736 | 8.47 | 202.3 | 350.24  | 368.77  | 352.75  | 349.25  | 351.05  | 354.53  | 354.43  | 6.64  | 1.9% |
| 8.47_253.0814m/z | 253.0814 | 8.47 | 156.7 | 56.83   | 55.22   | 59.35   | 55.64   | 56.34   | 56.82   | 56.70   | 1.32  | 2.3% |
| 8.49_469.6772m/z | 469.6772 | 8.49 | 162.6 | 381.07  | 395.73  | 372.46  | 379.70  | 383.93  | 381.65  | 382.42  | 6.94  | 1.8% |
| 8.49_429.1982m/z | 429.1982 | 8.49 | 196.0 | 922.98  | 955.92  | 907.93  | 922.55  | 913.97  | 923.98  | 924.56  | 15.16 | 1.6% |
| 8.48_346.1571m/z | 346.1571 | 8.48 | 178.9 | 16.62   | 17.94   | 15.75   | 16.42   | 16.46   | 16.66   | 16.64   | 0.65  | 3.9% |
| 8.48_191.0550m/z | 191.0550 | 8.48 | 135.1 | 72.57   | 73.91   | 73.56   | 70.32   | 73.26   | 72.63   | 72.71   | 1.17  | 1.6% |
| 8.48_638.7777m/z | 638.7777 | 8.48 | 188.9 | 582.45  | 601.92  | 567.35  | 594.81  | 573.31  | 583.56  | 583.90  | 11.77 | 2.0% |
| 8.48_270.1089m/z | 270.1089 | 8.48 | 157.7 | 369.64  | 383.38  | 369.53  | 360.39  | 372.15  | 370.41  | 370.92  | 6.73  | 1.8% |
| 8.47_373.1699m/z | 373.1699 | 8.47 | 183.4 | 47.88   | 50.66   | 47.36   | 45.21   | 47.92   | 47.93   | 47.83   | 1.59  | 3.3% |
| 8.47_608.2666m/z | 608.2666 | 8.47 | 228.8 | 30.85   | 33.00   | 32.53   | 31.23   | 31.60   | 32.07   | 31.88   | 0.74  | 2.3% |
| 8.47_483.2180m/z | 483.2180 | 8.47 | 207.4 | 277.16  | 291.37  | 267.94  | 279.36  | 274.91  | 277.76  | 278.08  | 6.98  | 2.5% |
| 8.47_269.0620m/z | 269.0620 | 8.47 | 152.7 | 120.18  | 126.53  | 112.20  | 121.39  | 122.55  | 120.15  | 120.50  | 4.29  | 3.6% |
| 8.11_722.8415m/z | 722.8415 | 8.11 | 198.3 | 19.15   | 20.92   | 16.37   | 20.17   | 19.04   | 19.18   | 19.14   | 1.41  | 7.4% |
| 8.11_400.1470m/z | 400.1470 | 8.11 | 181.0 | 136.83  | 138.69  | 132.42  | 142.39  | 132.92  | 136.88  | 136.69  | 3.39  | 2.5% |
| 8.11_573.7549m/z | 573.7549 | 8.11 | 174.3 | 564.43  | 566.30  | 559.82  | 567.66  | 563.61  | 564.30  | 564.35  | 2.44  | 0.4% |
| 8.11_474.1730m/z | 474.1730 | 8.11 | 202.2 | 395.66  | 397.98  | 394.66  | 393.79  | 396.89  | 395.56  | 395.76  | 1.38  | 0.3% |
| 8.10_709.2766m/z | 709.2766 | 8.10 | 240.4 | 25.86   | 28.10   | 21.78   | 29.06   | 23.51   | 25.94   | 25.71   | 2.49  | 9.7% |
| 8.10_567.2758m/z | 567.2758 | 8.10 | 227.7 | 691.64  | 693.53  | 686.33  | 700.84  | 684.00  | 691.64  | 691.33  | 5.39  | 0.8% |
| 8.09_679.2995m/z | 679.2995 | 8.09 | 240.8 | 31.36   | 30.78   | 32.86   | 28.59   | 33.25   | 31.27   | 31.35   | 1.52  | 4.8% |
| 8.09_510.2526m/z | 510.2526 | 8.09 | 217.7 | 169.87  | 173.56  | 168.24  | 162.41  | 176.60  | 169.71  | 170.07  | 4.42  | 2.6% |
| 8.09_628.2907m/z | 628.2907 | 8.09 | 235.9 | 140.82  | 141.00  | 141.78  | 138.09  | 142.53  | 140.74  | 140.83  | 1.37  | 1.0% |
| 8.09_841.8739m/z | 841.8739 | 8.09 | 213.0 | 92.93   | 94.09   | 92.78   | 89.64   | 96.19   | 92.85   | 93.08   | 1.95  | 2.1% |
| 8.08_709.3130m/z | 709.3130 | 8.08 | 195.0 | 30.74   | 29.15   | 32.36   | 30.09   | 30.71   | 30.71   | 30.63   | 0.96  | 3.1% |
| 8.08_509.2011m/z | 509.2011 | 8.08 | 214.1 | 54.72   | 54.98   | 54.64   | 55.72   | 53.20   | 54.75   | 54.67   | 0.75  | 1.4% |
| 8.08_444.2097m/z | 444.2097 | 8.08 | 199.2 | 2040.23 | 2050.74 | 2004.25 | 2094.99 | 2000.18 | 2040.53 | 2038.49 | 31.59 | 1.5% |
| 8.16_638.2998n   | 637.2926 | 8.16 | 235.8 | 598.27  | 608.97  | 590.13  | 598.39  | 598.65  | 598.31  | 598.79  | 5.47  | 0.9% |
| 8.16_272.0880m/z | 272.0880 | 8.16 | 159.3 | 240.29  | 244.67  | 239.52  | 237.16  | 240.57  | 240.31  | 240.42  | 2.22  | 0.9% |
| 8.15_316.1489m/z | 316.1489 | 8.15 | 169.6 | 39.96   | 42.86   | 36.90   | 40.58   | 40.07   | 40.03   | 40.07   | 1.74  | 4.3% |
| 8.15_709.2805m/z | 709.2805 | 8.15 | 247.9 | 30.04   | 30.47   | 29.05   | 30.72   | 30.02   | 30.03   | 30.05   | 0.52  | 1.7% |

|                  |          |      |       |        |        |        |        |        |        |        |       |       |
|------------------|----------|------|-------|--------|--------|--------|--------|--------|--------|--------|-------|-------|
| 8.15_518.2249m/z | 518.2249 | 8.15 | 219.4 | 219.01 | 222.94 | 217.43 | 214.33 | 222.95 | 218.92 | 219.27 | 3.03  | 1.4%  |
| 8.15_387.1862m/z | 387.1862 | 8.15 | 188.2 | 239.27 | 243.13 | 240.75 | 235.50 | 238.55 | 239.36 | 239.43 | 2.30  | 1.0%  |
| 8.14_582.1903m/z | 582.1903 | 8.14 | 225.6 | 25.83  | 23.82  | 27.84  | 23.38  | 27.56  | 25.73  | 25.69  | 1.68  | 6.5%  |
| 8.13_413.1996m/z | 413.1996 | 8.13 | 192.9 | 38.90  | 41.37  | 34.06  | 42.68  | 36.68  | 38.97  | 38.78  | 2.85  | 7.3%  |
| 8.13_688.3065m/z | 688.3065 | 8.13 | 195.2 | 340.97 | 327.77 | 346.85 | 353.29 | 326.99 | 340.99 | 339.48 | 9.51  | 2.8%  |
| 8.13_391.1615m/z | 391.1615 | 8.13 | 189.9 | 434.45 | 430.50 | 444.00 | 421.64 | 440.81 | 434.15 | 434.26 | 7.20  | 1.7%  |
| 8.12_345.1887n   | 344.1813 | 8.12 | 184.2 | 380.33 | 383.57 | 386.35 | 366.51 | 385.05 | 380.21 | 380.34 | 6.59  | 1.7%  |
| 8.12_920.4097m/z | 920.4097 | 8.12 | 280.0 | 798.31 | 809.50 | 777.22 | 821.36 | 782.71 | 798.53 | 797.94 | 14.96 | 1.9%  |
| 8.16_807.3269m/z | 807.3269 | 8.16 | 265.8 | 27.41  | 26.71  | 29.16  | 24.67  | 28.79  | 27.37  | 27.35  | 1.47  | 5.4%  |
| 8.03_399.1880m/z | 399.1880 | 8.03 | 191.4 | 134.08 | 134.25 | 134.36 | 132.52 | 135.68 | 134.00 | 134.15 | 0.92  | 0.7%  |
| 8.03_640.2932m/z | 640.2932 | 8.03 | 237.6 | 447.55 | 444.75 | 450.40 | 447.88 | 445.51 | 447.44 | 447.25 | 1.81  | 0.4%  |
| 8.03_642.3094m/z | 642.3094 | 8.03 | 233.9 | 664.73 | 663.41 | 656.73 | 677.36 | 658.84 | 664.62 | 664.28 | 6.57  | 1.0%  |
| 8.01_575.2442m/z | 575.2442 | 8.01 | 229.4 | 53.11  | 50.93  | 54.99  | 53.25  | 52.25  | 53.09  | 52.94  | 1.22  | 2.3%  |
| 8.01_217.1189m/z | 217.1189 | 8.01 | 151.7 | 494.52 | 487.32 | 502.63 | 483.89 | 503.59 | 494.07 | 494.34 | 7.22  | 1.5%  |
| 8.01_287.1242m/z | 287.1242 | 8.01 | 167.1 | 36.18  | 36.37  | 36.75  | 32.84  | 39.24  | 35.99  | 36.23  | 1.87  | 5.2%  |
| 8.01_591.2395m/z | 591.2395 | 8.01 | 227.3 | 32.63  | 30.68  | 35.91  | 26.10  | 36.55  | 32.41  | 32.38  | 3.47  | 10.7% |
| 8.03_141.0663m/z | 141.0663 | 8.03 | 130.7 | 16.35  | 16.28  | 16.32  | 16.14  | 16.66  | 16.34  | 16.35  | 0.15  | 0.9%  |
| 8.04_841.3723m/z | 841.3723 | 8.04 | 209.4 | 544.21 | 547.52 | 531.55 | 566.02 | 526.19 | 544.42 | 543.32 | 12.69 | 2.3%  |
| 8.06_541.2549m/z | 541.2549 | 8.06 | 217.1 | 12.51  | 12.56  | 12.85  | 10.52  | 13.97  | 12.44  | 12.48  | 1.02  | 8.2%  |
| 8.06_454.2318m/z | 454.2318 | 8.06 | 199.0 | 15.03  | 15.93  | 14.38  | 14.04  | 16.03  | 15.01  | 15.07  | 0.73  | 4.8%  |
| 8.06_584.2668m/z | 584.2668 | 8.06 | 225.5 | 35.14  | 36.43  | 33.40  | 33.94  | 37.22  | 35.07  | 35.20  | 1.32  | 3.7%  |
| 8.06_650.2810m/z | 650.2810 | 8.06 | 188.7 | 502.02 | 504.09 | 493.95 | 510.26 | 498.83 | 501.95 | 501.85 | 4.95  | 1.0%  |
| 8.06_227.1031m/z | 227.1031 | 8.06 | 152.9 | 429.09 | 427.62 | 436.41 | 418.50 | 432.97 | 428.89 | 428.91 | 5.52  | 1.3%  |
| 8.06_486.2320m/z | 486.2320 | 8.06 | 209.1 | 9.48   | 9.64   | 9.75   | 9.25   | 8.92   | 9.50   | 9.42   | 0.27  | 2.9%  |
| 8.06_673.2835m/z | 673.2835 | 8.06 | 188.4 | 105.41 | 104.42 | 107.13 | 102.98 | 107.04 | 105.34 | 105.39 | 1.44  | 1.4%  |
| 8.06_455.0959m/z | 455.0959 | 8.06 | 199.0 | 165.75 | 164.16 | 171.18 | 158.05 | 169.34 | 165.62 | 165.68 | 4.17  | 2.5%  |
| 8.06_199.0374m/z | 199.0374 | 8.06 | 134.7 | 157.51 | 156.29 | 155.47 | 162.91 | 153.72 | 157.52 | 157.24 | 2.85  | 1.8%  |
| 8.05_893.3785m/z | 893.3785 | 8.05 | 284.3 | 68.00  | 70.94  | 64.88  | 68.15  | 68.73  | 68.01  | 68.12  | 1.77  | 2.6%  |
| 8.05_261.0872m/z | 261.0872 | 8.05 | 159.7 | 108.35 | 107.23 | 112.40 | 103.77 | 109.26 | 108.30 | 108.22 | 2.56  | 2.4%  |

|                  |          |      |       |         |         |         |         |         |         |         |       |       |
|------------------|----------|------|-------|---------|---------|---------|---------|---------|---------|---------|-------|-------|
| 8.04_265.0930m/z | 265.0930 | 8.04 | 161.2 | 187.66  | 181.90  | 194.67  | 179.35  | 193.79  | 187.38  | 187.46  | 5.61  | 3.0%  |
| 8.04_185.0566m/z | 185.0566 | 8.04 | 137.1 | 752.00  | 742.20  | 767.23  | 736.05  | 759.87  | 751.52  | 751.48  | 10.35 | 1.4%  |
| 8.26_615.2049m/z | 615.2049 | 8.26 | 226.9 | 26.22   | 27.45   | 24.97   | 27.07   | 25.58   | 26.27   | 26.26   | 0.83  | 3.2%  |
| 8.26_616.7600m/z | 616.7600 | 8.26 | 189.2 | 71.35   | 73.04   | 70.54   | 71.42   | 70.91   | 71.39   | 71.44   | 0.78  | 1.1%  |
| 8.26_472.2033m/z | 472.2033 | 8.26 | 202.2 | 157.47  | 161.20  | 156.18  | 157.97  | 155.18  | 157.59  | 157.60  | 1.87  | 1.2%  |
| 8.26_583.2724m/z | 583.2724 | 8.26 | 229.2 | 857.33  | 880.85  | 839.90  | 869.91  | 842.31  | 858.06  | 858.06  | 14.36 | 1.7%  |
| 8.25_681.2896m/z | 681.2896 | 8.25 | 193.6 | 0.00    | 4.42    | 5.10    | 3.90    | 4.54    | 4.57    | 3.76    | 1.72  | 45.7% |
| 8.25_552.2190m/z | 552.2190 | 8.25 | 215.1 | 15.21   | 15.80   | 14.98   | 15.81   | 14.08   | 15.30   | 15.20   | 0.58  | 3.8%  |
| 8.25_399.0963m/z | 399.0963 | 8.25 | 174.1 | 48.92   | 24.13   | 88.55   | 65.54   | 50.24   | 48.79   | 54.36   | 19.52 | 35.9% |
| 8.24_527.2458m/z | 527.2458 | 8.24 | 215.5 | 160.97  | 172.31  | 154.41  | 163.96  | 157.99  | 161.93  | 161.93  | 5.55  | 3.4%  |
| 8.24_410.5617m/z | 410.5617 | 8.24 | 145.7 | 549.89  | 561.34  | 539.89  | 557.05  | 542.72  | 550.13  | 550.17  | 7.45  | 1.4%  |
| 8.24_600.2632m/z | 600.2632 | 8.24 | 225.3 | 982.71  | 1002.51 | 971.59  | 988.03  | 972.08  | 983.16  | 983.35  | 10.45 | 1.1%  |
| 8.27_610.2477m/z | 610.2477 | 8.27 | 226.9 | 508.75  | 516.42  | 508.12  | 509.11  | 503.05  | 509.06  | 509.08  | 3.90  | 0.8%  |
| 8.27_383.1219m/z | 383.1219 | 8.27 | 174.5 | 420.10  | 414.90  | 424.50  | 426.05  | 409.13  | 420.13  | 419.14  | 5.72  | 1.4%  |
| 8.27_370.1705m/z | 370.1705 | 8.27 | 178.3 | 24.94   | 23.57   | 27.23   | 22.77   | 25.23   | 24.92   | 24.78   | 1.40  | 5.6%  |
| 8.28_329.1096m/z | 329.1096 | 8.28 | 167.5 | 77.30   | 81.31   | 76.73   | 74.47   | 78.28   | 77.50   | 77.60   | 2.04  | 2.6%  |
| 8.28_216.0869m/z | 216.0869 | 8.28 | 150.1 | 80.32   | 87.08   | 82.16   | 83.29   | 77.81   | 83.01   | 82.28   | 2.84  | 3.5%  |
| 8.28_599.7705m/z | 599.7705 | 8.28 | 180.8 | 505.95  | 508.11  | 510.17  | 510.05  | 491.24  | 506.23  | 505.29  | 6.50  | 1.3%  |
| 8.27_608.2661m/z | 608.2661 | 8.27 | 230.7 | 11.95   | 13.87   | 11.20   | 11.20   | 13.20   | 12.37   | 12.30   | 0.99  | 8.0%  |
| 8.27_484.2353m/z | 484.2353 | 8.27 | 212.8 | 20.18   | 21.19   | 19.41   | 20.98   | 19.38   | 20.26   | 20.24   | 0.69  | 3.4%  |
| 8.19_259.1290m/z | 259.1290 | 8.19 | 159.8 | 211.81  | 219.40  | 210.48  | 209.73  | 208.97  | 212.08  | 212.08  | 3.45  | 1.6%  |
| 8.19_300.1554m/z | 300.1554 | 8.19 | 175.2 | 1272.51 | 1277.01 | 1266.81 | 1280.53 | 1263.28 | 1272.41 | 1272.09 | 5.79  | 0.5%  |
| 8.19_357.1777m/z | 357.1777 | 8.19 | 182.1 | 2696.84 | 2714.45 | 2713.60 | 2664.18 | 2695.25 | 2696.58 | 2696.82 | 16.64 | 0.6%  |
| 8.18_373.1721m/z | 373.1721 | 8.18 | 186.9 | 34.16   | 36.55   | 32.19   | 33.69   | 35.30   | 34.22   | 34.35   | 1.35  | 3.9%  |
| 8.19_303.1425n   | 284.1247 | 8.19 | 163.9 | 1773.27 | 1794.99 | 1772.39 | 1767.19 | 1759.76 | 1773.59 | 1773.53 | 10.74 | 0.6%  |
| 8.17_551.2408m/z | 551.2408 | 8.17 | 226.1 | 25.89   | 26.67   | 24.94   | 26.08   | 25.99   | 25.89   | 25.91   | 0.51  | 2.0%  |
| 8.17_438.1979m/z | 438.1979 | 8.17 | 201.2 | 43.06   | 44.53   | 41.31   | 44.16   | 42.41   | 43.09   | 43.09   | 1.07  | 2.5%  |
| 8.16_486.2147m/z | 486.2147 | 8.16 | 205.5 | 12.15   | 12.27   | 12.37   | 12.87   | 10.59   | 12.21   | 12.08   | 0.71  | 5.8%  |
| 8.16_320.1264m/z | 320.1264 | 8.16 | 179.7 | 52.09   | 54.06   | 49.02   | 54.30   | 50.84   | 52.12   | 52.07   | 1.82  | 3.5%  |



|                   |          |       |       |         |         |         |         |         |         |         |       |      |
|-------------------|----------|-------|-------|---------|---------|---------|---------|---------|---------|---------|-------|------|
| 8.16_267.0967m/z  | 267.0967 | 8.16  | 161.1 | 72.84   | 73.72   | 70.98   | 75.30   | 70.99   | 72.87   | 72.79   | 1.51  | 2.1% |
| 8.16_624.2990m/z  | 624.2990 | 8.16  | 234.1 | 1234.07 | 1251.68 | 1212.54 | 1255.18 | 1215.99 | 1234.37 | 1233.97 | 16.05 | 1.3% |
| 8.23_371.1928m/z  | 371.1928 | 8.23  | 186.9 | 5.47    | 5.84    | 5.24    | 4.87    | 6.01    | 5.45    | 5.48    | 0.37  | 6.8% |
| 8.23_313.1508m/z  | 313.1508 | 8.23  | 171.4 | 209.09  | 213.57  | 205.84  | 213.76  | 202.05  | 209.25  | 208.93  | 4.12  | 2.0% |
| 8.23_542.7549m/z  | 542.7549 | 8.23  | 176.5 | 330.95  | 320.00  | 334.89  | 339.83  | 323.84  | 330.87  | 330.07  | 6.58  | 2.0% |
| 8.22_352.0637m/z  | 352.0637 | 8.22  | 173.6 | 166.77  | 167.89  | 169.66  | 162.75  | 166.68  | 166.78  | 166.75  | 2.07  | 1.2% |
| 8.22_281.1129m/z  | 281.1129 | 8.22  | 165.7 | 11.69   | 11.72   | 11.87   | 11.53   | 11.67   | 11.69   | 11.69   | 0.10  | 0.9% |
| 8.22_265.0944m/z  | 265.0944 | 8.22  | 156.2 | 22.20   | 22.70   | 23.10   | 19.88   | 23.04   | 22.20   | 22.19   | 1.09  | 4.9% |
| 8.22_754.3392m/z  | 754.3392 | 8.22  | 260.7 | 108.93  | 115.26  | 105.91  | 107.09  | 109.71  | 109.17  | 109.34  | 2.95  | 2.7% |
| 8.22_904.4152m/z  | 904.4152 | 8.22  | 282.2 | 812.74  | 834.56  | 800.89  | 813.61  | 807.02  | 813.20  | 813.67  | 10.37 | 1.3% |
| 8.21_513.2270m/z  | 513.2270 | 8.21  | 215.8 | 46.19   | 47.61   | 46.43   | 45.88   | 45.02   | 46.28   | 46.24   | 0.77  | 1.7% |
| 8.21_784.3445m/z  | 784.3445 | 8.21  | 254.5 | 187.42  | 192.36  | 183.85  | 186.80  | 188.82  | 187.47  | 187.79  | 2.54  | 1.4% |
| 8.20_549.0825m/z  | 549.0825 | 8.20  | 217.0 | 15.53   | 15.35   | 16.51   | 15.10   | 15.06   | 15.62   | 15.53   | 0.48  | 3.1% |
| 10.26_96.9601m/z  | 96.9601  | 10.26 | 111.9 | 1276.21 | 1292.39 | 1272.72 | 1265.65 | 1275.70 | 1276.16 | 1276.47 | 8.01  | 0.6% |
| 11.19_416.9487m/z | 416.9487 | 11.19 | 170.3 | 142.31  | 144.05  | 143.19  | 140.31  | 140.57  | 142.33  | 142.13  | 1.33  | 0.9% |
| 11.25_326.1683m/z | 326.1683 | 11.25 | 183.0 | 57.31   | 56.92   | 48.87   | 64.29   | 54.27   | 57.36   | 56.50   | 4.57  | 8.1% |
| 11.25_544.9681n   | 589.9577 | 11.25 | 198.3 | 410.57  | 411.29  | 432.96  | 367.88  | 414.77  | 410.47  | 407.99  | 19.59 | 4.8% |
| 11.22_422.9619m/z | 422.9619 | 11.22 | 166.8 | 1901.28 | 2001.67 | 1811.18 | 1854.89 | 1894.53 | 1902.24 | 1894.30 | 57.88 | 3.1% |
| 11.27_394.9670m/z | 394.9670 | 11.27 | 159.1 | 2050.57 | 2155.27 | 1948.59 | 2021.69 | 2027.08 | 2051.73 | 2042.49 | 61.04 | 3.0% |
| 11.81_370.2092m/z | 370.2092 | 11.81 | 190.5 | 797.24  | 795.88  | 796.17  | 808.49  | 783.29  | 797.27  | 796.39  | 7.30  | 0.9% |
| 11.79_524.2836m/z | 524.2836 | 11.79 | 221.1 | 223.50  | 224.19  | 221.65  | 225.01  | 222.93  | 223.46  | 223.46  | 1.04  | 0.5% |
| 11.76_438.1954m/z | 438.1954 | 11.76 | 202.9 | 62.86   | 62.30   | 61.48   | 64.27   | 63.10   | 62.83   | 62.81   | 0.84  | 1.3% |
| 11.76_308.1612m/z | 308.1612 | 11.76 | 176.7 | 73.69   | 74.26   | 72.89   | 74.80   | 72.55   | 73.70   | 73.65   | 0.76  | 1.0% |
| 11.73_315.2033m/z | 315.2033 | 11.73 | 185.1 | 292.42  | 293.63  | 292.30  | 292.57  | 290.56  | 292.40  | 292.31  | 0.90  | 0.3% |
| 11.63_244.1664m/z | 244.1664 | 11.63 | 162.1 | 363.94  | 356.40  | 373.00  | 352.41  | 373.07  | 363.52  | 363.72  | 7.69  | 2.1% |
| 11.81_343.2087m/z | 343.2087 | 11.81 | 186.0 | 61.88   | 62.04   | 61.93   | 61.51   | 61.99   | 61.86   | 61.87   | 0.17  | 0.3% |
| 11.88_260.1351m/z | 260.1351 | 11.88 | 159.7 | 20.08   | 20.62   | 19.75   | 20.60   | 19.29   | 20.10   | 20.07   | 0.46  | 2.3% |
| 11.96_331.1982m/z | 331.1982 | 11.96 | 184.6 | 294.38  | 307.56  | 283.32  | 311.42  | 271.90  | 294.95  | 293.92  | 13.48 | 4.6% |
| 11.93_398.2153m/z | 398.2153 | 11.93 | 191.5 | 227.69  | 233.73  | 223.70  | 233.24  | 218.64  | 227.89  | 227.48  | 5.24  | 2.3% |

|                   |          |       |       |           |           |           |           |           |           |           |          |      |
|-------------------|----------|-------|-------|-----------|-----------|-----------|-----------|-----------|-----------|-----------|----------|------|
| 11.90_552.2901m/z | 552.2901 | 11.90 | 222.4 | 214.21    | 212.74    | 215.93    | 217.67    | 207.88    | 214.26    | 213.78    | 3.06     | 1.4% |
| 11.83_232.1297m/z | 232.1297 | 11.83 | 157.6 | 43.43     | 44.88     | 41.55     | 44.45     | 42.94     | 43.45     | 43.45     | 1.07     | 2.5% |
| 11.37_426.9635m/z | 426.9635 | 11.37 | 165.1 | 402.43    | 424.58    | 381.16    | 393.96    | 399.73    | 402.67    | 400.75    | 12.94    | 3.2% |
| 11.32_244.1663m/z | 244.1663 | 11.32 | 165.5 | 271.33    | 276.17    | 264.07    | 277.83    | 267.07    | 271.41    | 271.31    | 4.77     | 1.8% |
| 11.57_758.3439m/z | 758.3439 | 11.57 | 201.4 | 460.67    | 457.53    | 466.94    | 455.47    | 460.73    | 460.50    | 460.31    | 3.54     | 0.8% |
| 11.51_315.0382m/z | 315.0382 | 11.51 | 159.5 | 4.46      | 4.61      | 4.46      | 4.42      | 4.29      | 4.47      | 4.45      | 0.09     | 2.1% |
| 11.45_888.4638m/z | 888.4638 | 11.45 | 310.4 | 664.66    | 691.36    | 706.71    | 525.58    | 693.80    | 666.23    | 658.06    | 61.12    | 9.3% |
| 11.44_526.2925m/z | 526.2925 | 11.44 | 222.9 | 2.35      | 2.39      | 2.37      | 2.05      | 2.60      | 2.34      | 2.35      | 0.16     | 6.9% |
| 11.40_398.9686m/z | 398.9686 | 11.40 | 162.3 | 424.06    | 448.51    | 395.50    | 425.58    | 417.00    | 424.37    | 422.50    | 15.55    | 3.7% |
| 11.48_232.1298m/z | 232.1298 | 11.48 | 155.9 | 85.52     | 86.92     | 84.26     | 86.72     | 84.02     | 85.54     | 85.50     | 1.10     | 1.3% |
| 9.47_203.1035m/z  | 203.1035 | 9.47  | 145.8 | 707.08    | 703.40    | 731.65    | 759.90    | 547.75    | 708.51    | 693.05    | 67.84    | 9.8% |
| 10.08_424.9765m/z | 424.9765 | 10.08 | 177.0 | 302.24    | 304.92    | 277.17    | 314.11    | 307.47    | 302.00    | 301.32    | 11.54    | 3.8% |
| 10.08_315.1299m/z | 315.1299 | 10.08 | 179.9 | 41.27     | 36.24     | 42.81     | 44.35     | 43.54     | 41.17     | 41.56     | 2.64     | 6.4% |
| 10.14_317.1458m/z | 317.1458 | 10.14 | 167.8 | 34.18     | 34.93     | 30.67     | 34.39     | 36.29     | 34.12     | 34.10     | 1.70     | 5.0% |
| 10.09_305.5685m/z | 305.5685 | 10.09 | 137.0 | 104.05    | 103.99    | 101.57    | 105.33    | 105.14    | 103.99    | 104.01    | 1.22     | 1.2% |
| 10.09_305.0678m/z | 305.0678 | 10.09 | 135.4 | 465.37    | 466.61    | 454.08    | 469.58    | 470.87    | 465.09    | 465.27    | 5.43     | 1.2% |
| 9.72_309.0097m/z  | 309.0097 | 9.72  | 156.3 | 174.38    | 184.77    | 168.49    | 161.11    | 184.53    | 174.29    | 174.60    | 8.38     | 4.8% |
| 9.70_316.1131m/z  | 316.1131 | 9.70  | 167.9 | 23.16     | 20.11     | 24.26     | 22.82     | 24.25     | 23.09     | 22.95     | 1.39     | 6.1% |
| 9.78_639.3215m/z  | 639.3215 | 9.78  | 239.5 | 1051.47   | 1039.64   | 970.83    | 1116.04   | 1059.01   | 1050.59   | 1047.93   | 42.42    | 4.0% |
| 9.66_362.0505m/z  | 362.0505 | 9.66  | 168.2 | 579.52    | 574.15    | 559.82    | 577.06    | 605.02    | 578.44    | 579.00    | 13.37    | 2.3% |
| 9.64_335.0474m/z  | 335.0474 | 9.64  | 157.2 | 998.34    | 996.81    | 981.44    | 948.50    | 1064.26   | 995.92    | 997.55    | 34.44    | 3.5% |
| 9.92_382.5488m/z  | 382.5488 | 9.92  | 141.4 | 593.97    | 588.78    | 581.88    | 601.01    | 603.49    | 593.46    | 593.77    | 7.23     | 1.2% |
| 2.58_764.5205n    | 745.5026 | 2.58  | 282.3 | 280406.20 | 270282.68 | 301497.24 | 257447.40 | 285287.67 | 280158.57 | 279179.96 | 13474.00 | 4.8% |
| 2.64_717.4699m/z  | 717.4699 | 2.64  | 274.8 | 278.42    | 289.59    | 280.71    | 248.41    | 289.16    | 278.36    | 277.44    | 13.79    | 5.0% |
| 2.64_745.5060m/z  | 745.5060 | 2.64  | 347.8 | 125.27    | 109.70    | 139.86    | 125.98    | 114.01    | 125.26    | 123.35    | 9.67     | 7.8% |
| 2.48_334.0963m/z  | 334.0963 | 2.48  | 165.6 | 10092.53  | 10053.26  | 10181.69  | 10023.62  | 10096.37  | 10089.90  | 10089.56  | 48.66    | 0.5% |
| 2.45_773.5340m/z  | 773.5340 | 2.45  | 293.8 | 85382.75  | 82871.25  | 93398.73  | 75215.34  | 85665.19  | 85345.59  | 84646.48  | 5334.92  | 6.3% |
| 2.84_509.2885m/z  | 509.2885 | 2.84  | 226.9 | 55877.45  | 52628.24  | 59471.13  | 53085.37  | 57388.27  | 55796.18  | 55707.77  | 2358.81  | 4.2% |
| 2.82_691.4525m/z  | 691.4525 | 2.82  | 267.4 | 326.20    | 321.01    | 349.26    | 290.21    | 330.97    | 326.02    | 323.95    | 17.54    | 5.4% |

|                  |          |      |       |            |            |            |            |            |            |            |          |       |
|------------------|----------|------|-------|------------|------------|------------|------------|------------|------------|------------|----------|-------|
| 2.90_672.4762n   | 717.4678 | 2.90 | 270.9 | 131.73     | 119.39     | 149.49     | 113.23     | 137.60     | 131.51     | 130.49     | 11.80    | 9.0%  |
| 2.19_618.4488m/z | 618.4488 | 2.19 | 260.8 | 719.13     | 731.32     | 737.36     | 645.51     | 759.12     | 718.28     | 718.45     | 35.35    | 4.9%  |
| 2.22_514.8488m/z | 514.8488 | 2.22 | 208.5 | 4308.04    | 4413.35    | 3997.69    | 4625.61    | 4127.51    | 4310.72    | 4297.15    | 200.06   | 4.7%  |
| 2.22_514.6265m/z | 514.6265 | 2.22 | 210.3 | 8236.88    | 8319.08    | 8009.67    | 8511.29    | 8068.92    | 8238.55    | 8230.73    | 164.15   | 2.0%  |
| 2.22_514.9252m/z | 514.9252 | 2.22 | 208.5 | 11518.56   | 11809.00   | 10940.33   | 12069.57   | 11190.44   | 11524.20   | 11508.68   | 371.80   | 3.2%  |
| 2.22_515.4955m/z | 515.4955 | 2.22 | 210.3 | 11858.44   | 12051.98   | 11402.83   | 12370.84   | 11535.89   | 11862.84   | 11847.13   | 319.08   | 2.7%  |
| 2.22_514.4191m/z | 514.4191 | 2.22 | 208.5 | 10112.93   | 10448.62   | 9298.95    | 10992.68   | 9508.66    | 10122.62   | 10080.74   | 563.95   | 5.6%  |
| 2.22_514.2847m/z | 514.2847 | 2.22 | 208.5 | 1635194.42 | 1629218.86 | 1627934.31 | 1662746.48 | 1612169.05 | 1635118.12 | 1633730.20 | 15082.23 | 0.9%  |
| 2.21_184.0010m/z | 184.0010 | 2.21 | 121.3 | 301.03     | 322.34     | 223.40     | 354.47     | 268.64     | 301.67     | 295.26     | 41.20    | 14.0% |
| 2.12_498.8449m/z | 498.8449 | 2.12 | 208.8 | 6797.43    | 6743.54    | 6803.14    | 6818.37    | 6803.92    | 6794.60    | 6793.50    | 23.57    | 0.3%  |
| 2.11_498.6262m/z | 498.6262 | 2.11 | 207.0 | 13312.98   | 13347.38   | 13061.63   | 13680.08   | 13090.41   | 13313.35   | 13300.97   | 203.22   | 1.5%  |
| 2.17_206.8520m/z | 206.8520 | 2.17 | 117.1 | 427.68     | 417.27     | 429.21     | 432.60     | 427.45     | 427.44     | 426.94     | 4.69     | 1.1%  |
| 2.17_208.8496m/z | 208.8496 | 2.17 | 117.0 | 681.67     | 657.03     | 697.46     | 681.10     | 682.53     | 681.17     | 680.16     | 11.86    | 1.7%  |
| 2.16_434.2564m/z | 434.2564 | 2.16 | 208.4 | 182.21     | 186.53     | 180.73     | 177.38     | 181.80     | 182.22     | 181.81     | 2.69     | 1.5%  |
| 2.37_514.5501m/z | 514.5501 | 2.37 | 208.5 | 146.99     | 159.50     | 104.04     | 168.08     | 140.57     | 147.20     | 144.40     | 20.19    | 14.0% |
| 2.35_706.4660m/z | 706.4660 | 2.35 | 278.9 | 3950.27    | 4006.53    | 3951.42    | 3928.90    | 3881.47    | 3951.30    | 3944.98    | 36.94    | 0.9%  |
| 2.35_483.2728m/z | 483.2728 | 2.35 | 221.9 | 20425.86   | 19698.47   | 21141.59   | 19915.87   | 20808.16   | 20403.02   | 20398.83   | 490.53   | 2.4%  |
| 2.30_514.5505m/z | 514.5505 | 2.30 | 210.3 | 273.05     | 261.23     | 259.11     | 304.22     | 246.14     | 273.29     | 269.51     | 18.05    | 6.7%  |
| 2.11_498.9204m/z | 498.9204 | 2.11 | 208.8 | 16462.74   | 16268.18   | 16450.28   | 16680.75   | 16355.33   | 16457.44   | 16445.79   | 126.08   | 0.8%  |
| 3.70_247.0373m/z | 247.0373 | 3.70 | 150.3 | 43.71      | 38.37      | 50.72      | 36.61      | 45.97      | 43.62      | 43.16      | 4.68     | 10.8% |
| 3.66_197.1283m/z | 197.1283 | 3.66 | 147.8 | 0.00       | 4.67       | 0.00       | 5.36       | 5.00       | 4.99       | 3.34       | 2.37     | 71.0% |
| 3.66_446.2565m/z | 446.2565 | 3.66 | 211.8 | 361.66     | 339.17     | 339.28     | 380.24     | 363.10     | 361.28     | 357.45     | 14.42    | 4.0%  |
| 3.65_183.0045m/z | 183.0045 | 3.65 | 124.5 | 6277.25    | 6084.03    | 6639.47    | 5828.15    | 6480.30    | 6267.57    | 6262.79    | 261.50   | 4.2%  |
| 4.00_663.3826m/z | 663.3826 | 4.00 | 258.2 | 39.55      | 44.56      | 26.31      | 42.26      | 41.29      | 39.54      | 38.92      | 5.89     | 15.1% |
| 3.98_747.7674m/z | 747.7674 | 3.98 | 286.2 | 18999.10   | 18849.83   | 20351.13   | 16841.51   | 19190.43   | 18993.77   | 18870.96   | 1036.31  | 5.5%  |
| 4.06_665.4004m/z | 665.4004 | 4.06 | 262.0 | 93.53      | 96.19      | 88.79      | 95.64      | 92.56      | 93.54      | 93.38      | 2.41     | 2.6%  |
| 4.05_691.4534m/z | 691.4534 | 4.05 | 269.3 | 1370.29    | 1326.55    | 1387.10    | 1412.16    | 1328.79    | 1370.19    | 1365.85    | 30.42    | 2.2%  |
| 3.96_717.4692m/z | 717.4692 | 3.96 | 272.8 | 702.98     | 650.13     | 749.85     | 698.42     | 690.50     | 702.57     | 699.08     | 29.09    | 4.2%  |
| 3.83_747.9328m/z | 747.9328 | 3.83 | 284.2 | 227.56     | 208.57     | 250.29     | 209.09     | 233.45     | 227.20     | 226.03     | 14.37    | 6.4%  |

|                  |          |      |       |          |          |          |          |          |          |          |         |       |
|------------------|----------|------|-------|----------|----------|----------|----------|----------|----------|----------|---------|-------|
| 3.89_748.2926m/z | 748.2926 | 3.89 | 286.2 | 112.28   | 96.55    | 134.99   | 72.49    | 118.03   | 111.99   | 107.72   | 19.39   | 18.0% |
| 3.10_760.5184m/z | 760.5184 | 3.10 | 286.0 | 21398.11 | 20426.74 | 23736.59 | 18393.83 | 21764.01 | 21379.40 | 21183.11 | 1596.59 | 7.5%  |
| 3.10_481.2562m/z | 481.2562 | 3.10 | 218.3 | 1249.94  | 1106.66  | 1380.63  | 1112.15  | 1350.95  | 1244.72  | 1240.84  | 105.14  | 8.5%  |
| 3.08_747.5208m/z | 747.5208 | 3.08 | 79.0  | 705.29   | 578.26   | 791.02   | 698.72   | 646.13   | 705.30   | 687.45   | 64.71   | 9.4%  |
| 3.13_493.2699n   | 448.2728 | 3.13 | 217.2 | 360.19   | 334.09   | 399.93   | 296.59   | 392.84   | 358.88   | 357.09   | 34.92   | 9.8%  |
| 3.54_229.0383m/z | 229.0383 | 3.54 | 141.3 | 370.06   | 381.18   | 368.88   | 336.21   | 392.87   | 369.45   | 369.77   | 17.28   | 4.7%  |
| 3.36_422.2493n   | 421.2428 | 3.36 | 210.6 | 194.29   | 213.16   | 172.03   | 196.75   | 195.52   | 194.65   | 194.40   | 11.97   | 6.2%  |
| 1.05_246.9759m/z | 246.9759 | 1.05 | 138.9 | 1483.96  | 1444.54  | 1508.28  | 1464.16  | 1510.94  | 1482.52  | 1482.40  | 23.28   | 1.6%  |
| 1.04_279.1802m/z | 279.1802 | 1.04 | 177.7 | 458.98   | 447.02   | 489.32   | 407.54   | 483.19   | 458.21   | 457.38   | 26.71   | 5.8%  |
| 1.08_279.1266m/z | 279.1266 | 1.08 | 165.7 | 932.61   | 906.94   | 992.55   | 861.71   | 948.92   | 931.84   | 929.10   | 39.73   | 4.3%  |
| 0.96_197.0268m/z | 197.0268 | 0.96 | 142.9 | 257.25   | 258.41   | 243.85   | 272.20   | 251.52   | 257.27   | 256.75   | 8.52    | 3.3%  |
| 0.95_537.2886m/z | 537.2886 | 0.95 | 239.4 | 4835.06  | 4683.21  | 4953.56  | 4839.06  | 4807.76  | 4832.52  | 4825.19  | 78.83   | 1.6%  |
| 0.95_183.0118m/z | 183.0118 | 0.95 | 134.0 | 6030.18  | 5956.70  | 6023.15  | 6129.60  | 5970.66  | 6028.53  | 6023.14  | 55.65   | 0.9%  |
| 0.94_280.9363m/z | 280.9363 | 0.94 | 142.5 | 278.83   | 261.55   | 294.25   | 271.65   | 283.00   | 278.49   | 277.96   | 10.01   | 3.6%  |
| 1.02_248.9724m/z | 248.9724 | 1.02 | 138.8 | 136.31   | 138.78   | 122.02   | 149.49   | 130.87   | 136.38   | 135.64   | 8.27    | 6.1%  |
| 1.31_305.1778m/z | 305.1778 | 1.31 | 178.5 | 1762.51  | 1727.32  | 1789.80  | 1755.40  | 1766.34  | 1761.55  | 1760.49  | 18.37   | 1.0%  |
| 1.31_319.1939m/z | 319.1939 | 1.31 | 183.2 | 80.63    | 77.89    | 90.15    | 65.19    | 84.97    | 80.53    | 79.89    | 7.66    | 9.6%  |
| 1.31_323.1524m/z | 323.1524 | 1.31 | 176.2 | 147.24   | 152.93   | 124.98   | 173.94   | 123.28   | 147.52   | 144.98   | 17.24   | 11.9% |
| 1.29_281.1421m/z | 281.1421 | 1.29 | 167.4 | 2173.95  | 2144.48  | 2207.45  | 2156.59  | 2176.94  | 2172.97  | 2172.07  | 19.50   | 0.9%  |
| 1.28_326.1852m/z | 326.1852 | 1.28 | 190.0 | 231.95   | 238.82   | 219.56   | 251.25   | 209.48   | 232.31   | 230.56   | 13.33   | 5.8%  |
| 1.36_310.1803n   | 291.1625 | 1.36 | 175.6 | 2352.53  | 2312.90  | 2366.53  | 2381.44  | 2329.66  | 2351.87  | 2349.15  | 22.57   | 1.0%  |
| 1.33_392.2458m/z | 392.2458 | 1.33 | 202.3 | 83.69    | 92.35    | 61.66    | 98.72    | 73.80    | 83.89    | 82.35    | 12.07   | 14.7% |
| 1.33_736.4907m/z | 736.4907 | 1.33 | 278.5 | 931.48   | 898.69   | 979.79   | 887.85   | 948.51   | 930.57   | 929.48   | 30.49   | 3.3%  |
| 1.32_341.1779m/z | 341.1779 | 1.32 | 186.0 | 815.01   | 785.01   | 832.70   | 834.19   | 791.98   | 814.89   | 812.30   | 18.56   | 2.3%  |
| 1.26_362.2358m/z | 362.2358 | 1.26 | 196.0 | 289.90   | 305.81   | 254.99   | 293.14   | 298.59   | 289.78   | 288.70   | 16.07   | 5.6%  |
| 1.15_771.5162m/z | 771.5162 | 1.15 | 291.8 | 49.42    | 39.17    | 58.76    | 41.80    | 51.96    | 49.25    | 48.39    | 6.46    | 13.4% |
| 1.25_351.2197m/z | 351.2197 | 1.25 | 192.8 | 2543.85  | 2453.38  | 2566.41  | 2574.06  | 2548.96  | 2541.96  | 2538.10  | 39.66   | 1.6%  |
| 1.23_325.1475m/z | 325.1475 | 1.23 | 186.5 | 181.76   | 183.69   | 184.32   | 167.38   | 192.91   | 181.43   | 181.91   | 7.54    | 4.1%  |
| 1.23_254.1390m/z | 254.1390 | 1.23 | 163.4 | 1404.97  | 1355.32  | 1453.25  | 1390.27  | 1403.30  | 1404.13  | 1401.87  | 28.75   | 2.1%  |

|                  |          |      |       |          |          |           |          |          |          |          |         |       |
|------------------|----------|------|-------|----------|----------|-----------|----------|----------|----------|----------|---------|-------|
| 0.83_463.3089m/z | 463.3089 | 0.83 | 224.2 | 27.27    | 27.89    | 26.83     | 26.59    | 27.89    | 27.26    | 27.29    | 0.49    | 1.8%  |
| 0.83_492.9451m/z | 492.9451 | 0.83 | 198.2 | 16.59    | 15.20    | 18.27     | 17.28    | 13.55    | 16.60    | 16.25    | 1.52    | 9.3%  |
| 0.83_491.3398m/z | 491.3398 | 0.83 | 231.0 | 45.78    | 44.49    | 48.95     | 40.93    | 47.83    | 45.71    | 45.62    | 2.56    | 5.6%  |
| 0.83_287.1294m/z | 287.1294 | 0.83 | 162.1 | 10.41    | 10.73    | 10.12     | 9.90     | 10.60    | 10.40    | 10.36    | 0.28    | 2.7%  |
| 0.83_459.4206m/z | 459.4206 | 0.83 | 231.7 | 48.94    | 50.06    | 48.75     | 45.39    | 51.68    | 48.87    | 48.95    | 1.89    | 3.9%  |
| 0.83_377.2696m/z | 377.2696 | 0.83 | 208.1 | 131.59   | 123.80   | 142.87    | 120.38   | 135.62   | 131.40   | 130.94   | 7.39    | 5.6%  |
| 0.83_489.2658m/z | 489.2658 | 0.83 | 240.4 | 1633.83  | 1592.03  | 1651.83   | 1652.05  | 1623.31  | 1633.06  | 1631.02  | 20.28   | 1.2%  |
| 0.82_533.2918m/z | 533.2918 | 0.82 | 247.1 | 0.00     | 4.35     | 3.27      | 4.20     | 0.00     | 3.85     | 2.61     | 1.88    | 71.9% |
| 0.82_518.4104n   | 553.3723 | 0.82 | 244.8 | 204.59   | 189.10   | 221.15    | 195.30   | 205.73   | 204.36   | 203.37   | 9.94    | 4.9%  |
| 0.84_293.9579m/z | 293.9579 | 0.84 | 145.3 | 408.32   | 398.59   | 414.17    | 400.31   | 419.93   | 407.75   | 408.18   | 7.39    | 1.8%  |
| 0.84_459.2930m/z | 459.2930 | 0.84 | 229.9 | 622.79   | 589.67   | 655.58    | 606.09   | 628.69   | 622.17   | 620.83   | 20.26   | 3.3%  |
| 0.84_301.1110m/z | 301.1110 | 0.84 | 175.2 | 571.40   | 551.70   | 596.44    | 548.23   | 584.27   | 570.75   | 570.46   | 16.90   | 3.0%  |
| 0.84_669.2877m/z | 669.2877 | 0.84 | 285.4 | 1758.42  | 1648.99  | 1866.59   | 1721.16  | 1751.84  | 1757.03  | 1750.67  | 64.23   | 3.7%  |
| 0.84_475.2888m/z | 475.2888 | 0.84 | 235.1 | 3674.12  | 3521.31  | 3898.59   | 3527.75  | 3671.05  | 3671.82  | 3660.77  | 125.24  | 3.4%  |
| 0.84_473.4804m/z | 473.4804 | 0.84 | 235.1 | 1471.90  | 1412.56  | 1541.65   | 1421.66  | 1493.94  | 1470.42  | 1468.69  | 43.47   | 3.0%  |
| 0.84_473.2828m/z | 473.2828 | 0.84 | 235.1 | 98680.30 | 95954.85 | 101282.34 | 97735.04 | 98886.02 | 98618.20 | 98526.13 | 1580.92 | 1.6%  |
| 0.84_473.8976m/z | 473.8976 | 0.84 | 233.3 | 188.70   | 177.42   | 196.29    | 195.63   | 178.34   | 188.72   | 187.52   | 7.44    | 4.0%  |
| 0.84_473.6108m/z | 473.6108 | 0.84 | 233.3 | 259.25   | 247.17   | 273.10    | 262.14   | 243.43   | 259.32   | 257.40   | 9.80    | 3.8%  |
| 0.84_534.2583m/z | 534.2583 | 0.84 | 243.3 | 60.54    | 58.79    | 61.09     | 61.16    | 60.67    | 60.50    | 60.46    | 0.79    | 1.3%  |
| 0.84_310.1290m/z | 310.1290 | 0.84 | 169.7 | 58.86    | 58.76    | 59.61     | 56.69    | 60.51    | 58.80    | 58.87    | 1.15    | 2.0%  |
| 0.84_412.2099m/z | 412.2099 | 0.84 | 212.6 | 33.06    | 31.38    | 35.07     | 31.31    | 34.00    | 33.01    | 32.97    | 1.34    | 4.1%  |
| 0.84_280.0972n   | 325.1030 | 0.84 | 169.3 | 129.18   | 130.69   | 125.69    | 133.99   | 125.08   | 129.24   | 128.98   | 3.00    | 2.3%  |
| 0.84_439.2846m/z | 439.2846 | 0.84 | 226.6 | 115.46   | 121.38   | 109.11    | 113.99   | 117.60   | 115.47   | 115.50   | 3.70    | 3.2%  |
| 0.84_661.4389m/z | 661.4389 | 0.84 | 275.7 | 1047.87  | 1010.12  | 1082.19   | 1041.36  | 1043.76  | 1047.26  | 1045.43  | 20.93   | 2.0%  |
| 0.84_439.3035m/z | 439.3035 | 0.84 | 219.2 | 1743.52  | 1703.79  | 1815.16   | 1681.67  | 1754.48  | 1742.48  | 1740.18  | 42.01   | 2.4%  |
| 0.84_535.3058m/z | 535.3058 | 0.84 | 250.8 | 1498.94  | 1412.78  | 1609.10   | 1428.42  | 1503.74  | 1497.64  | 1491.77  | 63.57   | 4.3%  |
| 0.82_519.3690m/z | 519.3690 | 0.82 | 241.7 | 155.82   | 145.60   | 165.56    | 152.48   | 155.45   | 155.69   | 155.10   | 5.88    | 3.8%  |
| 0.82_485.4356m/z | 485.4356 | 0.82 | 238.6 | 135.38   | 138.44   | 130.32    | 143.70   | 125.39   | 135.57   | 134.80   | 5.80    | 4.3%  |
| 0.82_603.3666m/z | 603.3666 | 0.82 | 251.5 | 217.13   | 215.34   | 219.18    | 219.61   | 211.93   | 217.14   | 216.72   | 2.57    | 1.2%  |

|                  |          |      |       |          |          |          |          |          |          |          |        |       |
|------------------|----------|------|-------|----------|----------|----------|----------|----------|----------|----------|--------|-------|
| 0.79_605.3768m/z | 605.3768 | 0.79 | 268.8 | 21.78    | 21.81    | 21.85    | 22.49    | 20.69    | 21.79    | 21.73    | 0.53   | 2.4%  |
| 0.79_709.4496m/z | 709.4496 | 0.79 | 292.8 | 20.33    | 20.53    | 20.72    | 18.10    | 21.85    | 20.29    | 20.30    | 1.12   | 5.5%  |
| 0.82_555.3897m/z | 555.3897 | 0.82 | 244.7 | 570.82   | 553.25   | 597.37   | 556.09   | 567.27   | 570.57   | 569.23   | 14.31  | 2.5%  |
| 0.82_666.0588m/z | 666.0588 | 0.82 | 260.0 | 468.09   | 460.49   | 476.20   | 466.51   | 465.81   | 467.93   | 467.50   | 4.64   | 1.0%  |
| 0.81_722.1223m/z | 722.1223 | 0.81 | 280.6 | 105.45   | 104.99   | 106.15   | 102.79   | 108.01   | 105.35   | 105.46   | 1.55   | 1.5%  |
| 0.80_387.7122m/z | 387.7122 | 0.80 | 204.2 | 143.34   | 140.08   | 147.98   | 138.34   | 146.19   | 143.21   | 143.19   | 3.30   | 2.3%  |
| 0.80_387.4525m/z | 387.4525 | 0.80 | 202.4 | 166.54   | 164.40   | 168.65   | 165.36   | 167.05   | 166.46   | 166.41   | 1.33   | 0.8%  |
| 0.80_383.2222m/z | 383.2222 | 0.80 | 213.4 | 41.15    | 39.01    | 42.18    | 41.56    | 41.16    | 41.11    | 41.03    | 0.98   | 2.4%  |
| 0.80_619.3629m/z | 619.3629 | 0.80 | 258.9 | 181.43   | 180.81   | 184.54   | 177.51   | 182.59   | 181.37   | 181.38   | 2.11   | 1.2%  |
| 0.80_387.6458m/z | 387.6458 | 0.80 | 204.2 | 72.62    | 71.62    | 73.05    | 74.26    | 70.64    | 72.62    | 72.47    | 1.13   | 1.6%  |
| 0.80_388.1615m/z | 388.1615 | 0.80 | 87.9  | 42.33    | 38.98    | 44.20    | 40.90    | 44.72    | 42.21    | 42.22    | 1.93   | 4.6%  |
| 0.80_389.1614m/z | 389.1614 | 0.80 | 204.2 | 885.36   | 867.95   | 904.56   | 872.02   | 892.37   | 884.75   | 884.50   | 12.21  | 1.4%  |
| 0.80_387.3343m/z | 387.3343 | 0.80 | 202.4 | 598.87   | 579.68   | 616.30   | 594.42   | 598.83   | 598.51   | 597.77   | 10.68  | 1.8%  |
| 0.80_387.1563m/z | 387.1563 | 0.80 | 204.2 | 35074.24 | 34465.35 | 35682.59 | 34807.07 | 35138.47 | 35055.94 | 35037.28 | 367.08 | 1.0%  |
| 0.84_518.2685m/z | 518.2685 | 0.84 | 239.8 | 21.63    | 21.74    | 23.81    | 11.47    | 24.70    | 21.56    | 20.82    | 4.35   | 20.9% |
| 0.90_573.3290m/z | 573.3290 | 0.90 | 240.6 | 220.57   | 215.98   | 213.46   | 227.67   | 224.38   | 220.10   | 220.36   | 4.77   | 2.2%  |
| 0.90_553.2812m/z | 553.2812 | 0.90 | 241.0 | 291.24   | 295.59   | 269.07   | 320.48   | 269.06   | 291.57   | 289.50   | 17.51  | 6.0%  |
| 0.89_400.2262m/z | 400.2262 | 0.89 | 202.1 | 10.42    | 7.68     | 13.20    | 6.73     | 0.00     | 10.41    | 8.07     | 4.17   | 51.7% |
| 0.89_469.2827m/z | 469.2827 | 0.89 | 222.2 | 2274.02  | 2202.78  | 2351.59  | 2257.24  | 2252.98  | 2273.08  | 2268.62  | 44.05  | 1.9%  |
| 0.89_381.2315m/z | 381.2315 | 0.89 | 199.0 | 11116.76 | 10887.39 | 11389.52 | 10951.43 | 11163.69 | 11110.12 | 11103.15 | 160.98 | 1.4%  |
| 0.92_522.2950m/z | 522.2950 | 0.92 | 237.8 | 249.23   | 222.03   | 287.44   | 205.12   | 264.35   | 248.72   | 246.15   | 26.83  | 10.9% |
| 0.86_453.2877m/z | 453.2877 | 0.86 | 220.7 | 201.66   | 186.49   | 215.13   | 193.08   | 207.88   | 201.30   | 200.92   | 9.32   | 4.6%  |
| 0.86_368.9758m/z | 368.9758 | 0.86 | 138.6 | 761.76   | 757.53   | 756.66   | 765.55   | 766.24   | 761.34   | 761.51   | 3.61   | 0.5%  |
| 0.86_285.1160m/z | 285.1160 | 0.86 | 175.8 | 1142.12  | 1112.37  | 1153.21  | 1162.97  | 1126.43  | 1141.75  | 1139.81  | 16.62  | 1.5%  |
| 0.86_294.1343m/z | 294.1343 | 0.86 | 170.3 | 863.51   | 831.31   | 900.71   | 842.21   | 869.09   | 862.84   | 861.61   | 21.93  | 2.5%  |
| 0.86_291.9611m/z | 291.9611 | 0.86 | 145.4 | 1717.71  | 1701.55  | 1702.02  | 1734.74  | 1727.76  | 1716.70  | 1716.75  | 12.21  | 0.7%  |
| 0.86_318.9795m/z | 318.9795 | 0.86 | 130.3 | 2194.43  | 2155.86  | 2213.03  | 2200.47  | 2196.71  | 2193.21  | 2192.28  | 17.56  | 0.8%  |
| 0.86_485.2808m/z | 485.2808 | 0.86 | 231.1 | 7107.45  | 6881.77  | 7355.21  | 7042.53  | 7053.79  | 7104.24  | 7090.83  | 140.10 | 2.0%  |
| 0.85_341.1833m/z | 341.1833 | 0.85 | 189.5 | 2353.48  | 2269.27  | 2427.06  | 2308.48  | 2390.18  | 2351.05  | 2349.92  | 51.33  | 2.2%  |

|                  |          |      |       |            |            |            |            |            |            |            |          |      |
|------------------|----------|------|-------|------------|------------|------------|------------|------------|------------|------------|----------|------|
| 0.85_421.2264m/z | 421.2264 | 0.85 | 212.4 | 14207.31   | 13771.06   | 14628.61   | 14069.37   | 14209.87   | 14198.65   | 14180.81   | 252.56   | 1.8% |
| 0.84_473.5380m/z | 473.5380 | 0.84 | 235.1 | 52.63      | 57.11      | 46.22      | 50.03      | 56.56      | 52.56      | 52.52      | 3.73     | 7.1% |
| 0.87_280.1188m/z | 280.1188 | 0.87 | 165.7 | 2053.77    | 2014.18    | 2092.59    | 2046.22    | 2046.18    | 2052.86    | 2050.97    | 22.88    | 1.1% |
| 0.89_465.3034m/z | 465.3034 | 0.89 | 242.9 | 1162.62    | 1141.57    | 1190.38    | 1141.18    | 1170.58    | 1161.91    | 1161.37    | 16.97    | 1.5% |
| 0.89_653.3012m/z | 653.3012 | 0.89 | 269.9 | 21098.37   | 20621.25   | 21493.89   | 21124.61   | 20957.17   | 21089.81   | 21064.18   | 257.48   | 1.2% |
| 0.87_321.3734m/z | 321.3734 | 0.87 | 184.9 | 133.73     | 129.99     | 146.27     | 109.55     | 142.69     | 133.50     | 132.62     | 11.75    | 8.9% |
| 0.87_327.1652m/z | 327.1652 | 0.87 | 186.5 | 367.67     | 358.15     | 377.45     | 356.84     | 376.91     | 367.23     | 367.38     | 8.05     | 2.2% |
| 0.87_365.2353m/z | 365.2353 | 0.87 | 197.7 | 1136.24    | 1100.49    | 1181.37    | 1101.72    | 1150.71    | 1135.23    | 1134.30    | 27.97    | 2.5% |
| 0.87_349.2409m/z | 349.2409 | 0.87 | 194.6 | 1908.13    | 1849.46    | 1973.74    | 1878.35    | 1909.95    | 1906.94    | 1904.43    | 37.76    | 2.0% |
| 0.88_409.2611m/z | 409.2611 | 0.88 | 207.2 | 528.88     | 502.26     | 552.43     | 520.09     | 533.15     | 528.38     | 527.53     | 14.99    | 2.8% |
| 1.36_379.2148m/z | 379.2148 | 1.36 | 195.5 | 1455.38    | 1391.34    | 1485.82    | 1486.43    | 1427.09    | 1454.86    | 1450.16    | 33.24    | 2.3% |
| 1.36_651.3855m/z | 651.3855 | 1.36 | 258.3 | 1076.31    | 1031.52    | 1088.43    | 1091.64    | 1079.65    | 1075.44    | 1073.83    | 19.84    | 1.8% |
| 1.79_317.0903m/z | 317.0903 | 1.79 | 164.4 | 1627.24    | 1639.72    | 1578.09    | 1687.07    | 1593.54    | 1627.47    | 1625.52    | 34.80    | 2.1% |
| 1.79_496.2736m/z | 496.2736 | 1.79 | 208.9 | 39407.96   | 37353.48   | 39722.87   | 41086.85   | 38292.23   | 39397.23   | 39210.10   | 1165.39  | 3.0% |
| 1.86_213.9631m/z | 213.9631 | 1.86 | 138.7 | 1224.44    | 1213.87    | 1213.67    | 1266.09    | 1189.79    | 1224.61    | 1222.08    | 22.84    | 1.9% |
| 1.69_249.0314m/z | 249.0314 | 1.69 | 153.5 | 673.37     | 656.44     | 657.77     | 691.90     | 676.83     | 672.86     | 671.53     | 12.01    | 1.8% |
| 1.76_492.2405m/z | 492.2405 | 1.76 | 218.1 | 3205.31    | 3119.35    | 3269.90    | 3178.86    | 3231.30    | 3202.85    | 3201.26    | 46.27    | 1.4% |
| 1.74_167.0089m/z | 167.0089 | 1.74 | 122.3 | 103.50     | 104.25     | 104.16     | 99.74      | 106.07     | 103.45     | 103.53     | 1.90     | 1.8% |
| 1.74_236.1073m/z | 236.1073 | 1.74 | 147.5 | 1270.22    | 1226.44    | 1294.41    | 1264.56    | 1283.44    | 1269.03    | 1268.02    | 21.14    | 1.7% |
| 2.10_498.4907m/z | 498.4907 | 2.10 | 207.1 | 59142.89   | 58569.85   | 58549.29   | 60898.19   | 57999.69   | 59139.32   | 59049.87   | 914.40   | 1.5% |
| 2.10_498.2900m/z | 498.2900 | 2.10 | 208.9 | 2219485.56 | 2197857.98 | 2209318.77 | 2273893.80 | 2176507.55 | 2219371.61 | 2216072.55 | 29745.03 | 1.3% |
| 1.91_581.2968m/z | 581.2968 | 1.91 | 238.6 | 411.08     | 413.76     | 382.85     | 430.72     | 411.43     | 410.91     | 410.13     | 14.05    | 3.4% |
| 1.90_541.2934m/z | 541.2934 | 1.90 | 220.8 | 1106.46    | 1125.25    | 974.19     | 1251.56    | 1010.27    | 1107.80    | 1095.92    | 88.97    | 8.1% |
| 1.96_555.2841m/z | 555.2841 | 1.96 | 233.5 | 141574.59  | 140662.96  | 140709.69  | 144447.43  | 139527.26  | 141557.57  | 141413.25  | 1520.31  | 1.1% |
| 1.46_513.2877m/z | 513.2877 | 1.46 | 219.5 | 1137.65    | 1121.70    | 1159.63    | 1140.01    | 1116.03    | 1137.56    | 1135.43    | 14.03    | 1.2% |
| 1.46_295.1216m/z | 295.1216 | 1.46 | 166.9 | 2713.22    | 2693.87    | 2672.19    | 2779.29    | 2690.35    | 2712.55    | 2710.24    | 33.89    | 1.3% |
| 1.45_476.2447m/z | 476.2447 | 1.45 | 216.6 | 521.59     | 502.50     | 536.91     | 537.71     | 494.32     | 521.70     | 519.12     | 16.16    | 3.1% |
| 1.45_449.1493m/z | 449.1493 | 1.45 | 217.2 | 20966.32   | 20395.29   | 21222.48   | 21005.95   | 21075.35   | 20951.34   | 20936.12   | 258.17   | 1.2% |
| 1.49_367.2142m/z | 367.2142 | 1.49 | 195.8 | 518.33     | 485.92     | 551.98     | 500.76     | 522.61     | 517.83     | 516.24     | 20.35    | 3.9% |

|                  |          |      |       |           |           |           |           |           |           |           |         |      |
|------------------|----------|------|-------|-----------|-----------|-----------|-----------|-----------|-----------|-----------|---------|------|
| 1.49_351.1841m/z | 351.1841 | 1.49 | 189.2 | 2298.00   | 2267.97   | 2324.36   | 2279.14   | 2311.22   | 2296.78   | 2296.25   | 18.75   | 0.8% |
| 1.49_447.1342m/z | 447.1342 | 1.49 | 211.8 | 59839.79  | 58504.43  | 60531.55  | 60034.01  | 59857.43  | 59806.69  | 59762.32  | 614.39  | 1.0% |
| 1.47_377.0683m/z | 377.0683 | 1.47 | 176.4 | 396.69    | 397.27    | 386.24    | 419.34    | 377.94    | 396.86    | 395.72    | 12.70   | 3.2% |
| 1.47_321.1723m/z | 321.1723 | 1.47 | 176.2 | 789.06    | 770.36    | 800.03    | 790.72    | 788.84    | 788.62    | 787.94    | 8.81    | 1.1% |
| 1.39_307.1944m/z | 307.1944 | 1.39 | 181.9 | 4446.24   | 4346.16   | 4536.07   | 4416.61   | 4452.62   | 4443.82   | 4440.25   | 55.97   | 1.3% |
| 1.38_269.1301m/z | 269.1301 | 1.38 | 176.4 | 125.95    | 113.70    | 137.30    | 121.16    | 125.58    | 125.81    | 124.92    | 7.02    | 5.6% |
| 1.38_499.3094m/z | 499.3094 | 1.38 | 221.6 | 6592.89   | 6439.34   | 6658.41   | 6637.05   | 6587.78   | 6589.21   | 6584.11   | 70.00   | 1.1% |
| 1.37_327.1627m/z | 327.1627 | 1.37 | 183.0 | 1132.51   | 1110.90   | 1130.39   | 1174.92   | 1094.83   | 1132.63   | 1129.36   | 24.60   | 2.2% |
| 1.39_493.1942m/z | 493.1942 | 1.39 | 210.8 | 421.46    | 382.05    | 444.06    | 446.53    | 385.35    | 421.58    | 416.84    | 25.39   | 6.1% |
| 1.42_211.0175m/z | 211.0175 | 1.42 | 137.3 | 285.86    | 249.22    | 316.21    | 275.47    | 283.91    | 285.54    | 282.70    | 19.65   | 6.9% |
| 1.42_385.1773m/z | 385.1773 | 1.42 | 204.3 | 1690.44   | 1647.14   | 1690.07   | 1746.95   | 1651.69   | 1690.19   | 1686.08   | 32.80   | 1.9% |
| 1.64_514.2660m/z | 514.2660 | 1.64 | 214.0 | 8797.12   | 8690.93   | 8721.99   | 9046.67   | 8644.51   | 8796.11   | 8782.89   | 129.92  | 1.5% |
| 1.62_278.8476m/z | 278.8476 | 1.62 | 128.3 | 346.24    | 354.30    | 295.97    | 376.20    | 343.68    | 346.16    | 343.76    | 24.01   | 7.0% |
| 1.62_515.3045m/z | 515.3045 | 1.62 | 215.8 | 201407.55 | 197335.60 | 202697.41 | 204518.37 | 199156.75 | 201345.27 | 201076.83 | 2321.47 | 1.2% |
| 1.68_204.9728m/z | 204.9728 | 1.68 | 137.6 | 818.04    | 779.22    | 831.61    | 841.69    | 799.02    | 817.77    | 814.56    | 20.57   | 2.5% |
| 1.67_152.9954m/z | 152.9954 | 1.67 | 121.7 | 225.56    | 218.36    | 231.48    | 227.20    | 221.64    | 225.50    | 224.96    | 4.14    | 1.8% |
| 1.67_187.0063m/z | 187.0063 | 1.67 | 132.2 | 928.42    | 897.67    | 924.91    | 954.16    | 921.34    | 927.91    | 925.74    | 16.47   | 1.8% |
| 1.53_372.8222m/z | 372.8222 | 1.53 | 133.7 | 434.18    | 422.87    | 385.90    | 479.04    | 420.86    | 434.15    | 429.50    | 27.44   | 6.4% |
| 1.52_294.1366m/z | 294.1366 | 1.52 | 168.6 | 108.92    | 105.63    | 100.94    | 117.52    | 106.44    | 108.90    | 108.06    | 5.00    | 4.6% |
| 1.52_480.2781m/z | 480.2781 | 1.52 | 214.7 | 7130.76   | 6975.85   | 7176.12   | 7172.33   | 7152.36   | 7126.37   | 7122.30   | 68.12   | 1.0% |
| 1.51_251.0493m/z | 251.0493 | 1.51 | 155.1 | 372.40    | 368.01    | 362.46    | 398.43    | 350.29    | 372.62    | 370.70    | 14.53   | 3.9% |
| 1.58_361.1159m/z | 361.1159 | 1.58 | 176.8 | 1194.82   | 1165.06   | 1155.69   | 1277.91   | 1148.02   | 1194.96   | 1189.41   | 43.46   | 3.7% |
| 1.57_508.2358m/z | 508.2358 | 1.57 | 217.7 | 116.05    | 122.81    | 106.14    | 121.44    | 113.31    | 116.16    | 115.99    | 5.48    | 4.7% |
| 1.57_529.3172m/z | 529.3172 | 1.57 | 221.0 | 1367.95   | 1371.84   | 1376.10   | 1331.98   | 1393.90   | 1367.01   | 1368.13   | 18.48   | 1.4% |
| 1.57_403.1888m/z | 403.1888 | 1.57 | 207.4 | 23140.26  | 22631.47  | 23121.03  | 23747.24  | 22788.69  | 23134.30  | 23093.83  | 350.80  | 1.5% |
| 1.54_307.1571m/z | 307.1571 | 1.54 | 176.7 | 878.16    | 879.43    | 867.28    | 879.71    | 886.01    | 877.74    | 878.06    | 5.54    | 0.6% |
| 6.36_204.0659m/z | 204.0659 | 6.36 | 147.4 | 328.05    | 328.77    | 331.99    | 318.69    | 332.53    | 327.88    | 327.99    | 4.54    | 1.4% |
| 6.35_725.3823m/z | 725.3823 | 6.35 | 249.6 | 93.90     | 93.20     | 90.91     | 97.74     | 92.99     | 93.87     | 93.77     | 2.04    | 2.2% |
| 6.33_571.3065m/z | 571.3065 | 6.33 | 223.9 | 102.12    | 100.74    | 107.30    | 98.02     | 100.11    | 102.12    | 101.74    | 2.85    | 2.8% |



|                  |          |      |       |         |         |         |         |         |         |         |       |      |
|------------------|----------|------|-------|---------|---------|---------|---------|---------|---------|---------|-------|------|
| 6.33_537.3003m/z | 537.3003 | 6.33 | 226.4 | 103.98  | 106.80  | 104.91  | 99.05   | 104.71  | 104.00  | 103.91  | 2.37  | 2.3% |
| 6.33_412.2189m/z | 412.2189 | 6.33 | 196.4 | 232.67  | 226.37  | 228.25  | 246.33  | 223.98  | 232.70  | 231.72  | 7.26  | 3.1% |
| 6.33_314.1139m/z | 314.1139 | 6.33 | 174.7 | 597.63  | 596.46  | 595.52  | 595.84  | 602.75  | 597.30  | 597.58  | 2.42  | 0.4% |
| 6.32_693.3208m/z | 693.3208 | 6.32 | 246.3 | 2324.75 | 2315.27 | 2310.64 | 2350.64 | 2315.52 | 2324.04 | 2323.48 | 13.13 | 0.6% |
| 6.31_567.3097m/z | 567.3097 | 6.31 | 231.4 | 7.64    | 7.68    | 7.60    | 6.50    | 8.48    | 7.60    | 7.58    | 0.58  | 7.6% |
| 6.37_467.1895m/z | 467.1895 | 6.37 | 198.7 | 2607.13 | 2606.32 | 2593.95 | 2640.46 | 2575.52 | 2606.92 | 2605.05 | 19.40 | 0.7% |
| 6.41_413.2353m/z | 413.2353 | 6.41 | 196.4 | 564.13  | 566.37  | 564.93  | 559.96  | 565.28  | 563.99  | 564.11  | 2.02  | 0.4% |
| 6.40_650.2716m/z | 650.2716 | 6.40 | 248.8 | 92.89   | 93.35   | 96.76   | 84.72   | 96.19   | 92.82   | 92.79   | 3.93  | 4.2% |
| 6.39_261.1241m/z | 261.1241 | 6.39 | 163.1 | 803.25  | 799.94  | 804.98  | 805.36  | 800.00  | 803.04  | 802.76  | 2.14  | 0.3% |
| 6.38_413.2334m/z | 413.2334 | 6.38 | 196.4 | 115.98  | 115.67  | 120.14  | 112.93  | 112.20  | 116.02  | 115.49  | 2.57  | 2.2% |
| 6.38_284.1248m/z | 284.1248 | 6.38 | 167.3 | 3062.09 | 3070.23 | 3037.57 | 3084.65 | 3050.52 | 3061.43 | 3061.08 | 14.75 | 0.5% |
| 6.22_537.3030m/z | 537.3030 | 6.22 | 226.4 | 60.99   | 52.83   | 63.55   | 65.17   | 57.23   | 60.99   | 60.13   | 4.09  | 6.8% |
| 6.21_583.2490m/z | 583.2490 | 6.21 | 233.0 | 40.52   | 40.92   | 40.47   | 37.07   | 43.86   | 40.38   | 40.54   | 1.97  | 4.9% |
| 6.21_328.1503m/z | 328.1503 | 6.21 | 184.7 | 387.02  | 391.91  | 390.00  | 376.62  | 389.30  | 386.96  | 386.97  | 4.93  | 1.3% |
| 6.20_274.2437m/z | 274.2437 | 6.20 | 157.5 | 23.49   | 22.83   | 23.89   | 22.63   | 24.82   | 23.43   | 23.51   | 0.72  | 3.1% |
| 6.19_286.1354m/z | 286.1354 | 6.19 | 168.9 | 21.69   | 22.18   | 19.90   | 23.29   | 21.04   | 21.70   | 21.64   | 1.03  | 4.8% |
| 6.24_580.2355m/z | 580.2355 | 6.24 | 223.8 | 119.32  | 120.98  | 115.58  | 117.86  | 124.06  | 119.12  | 119.49  | 2.62  | 2.2% |
| 6.30_207.0865m/z | 207.0865 | 6.30 | 144.0 | 76.54   | 74.81   | 82.91   | 67.30   | 78.53   | 76.48   | 76.10   | 4.69  | 6.2% |
| 6.28_413.2360m/z | 413.2360 | 6.28 | 196.4 | 206.46  | 210.77  | 199.52  | 210.39  | 205.28  | 206.47  | 206.48  | 3.73  | 1.8% |
| 6.28_194.9962m/z | 194.9962 | 6.28 | 128.5 | 374.74  | 368.61  | 390.21  | 352.59  | 385.35  | 374.32  | 374.30  | 12.10 | 3.2% |
| 6.28_511.2868m/z | 511.2868 | 6.28 | 219.5 | 38.18   | 36.34   | 40.81   | 35.00   | 40.11   | 38.09   | 38.09   | 2.00  | 5.3% |
| 6.27_355.1619m/z | 355.1619 | 6.27 | 180.4 | 2118.20 | 2119.22 | 2114.64 | 2125.18 | 2108.28 | 2117.78 | 2117.22 | 5.08  | 0.2% |
| 6.26_399.0993m/z | 399.0993 | 6.26 | 184.5 | 490.08  | 490.42  | 484.00  | 499.56  | 484.38  | 490.04  | 489.75  | 5.14  | 1.1% |
| 6.19_721.3491m/z | 721.3491 | 6.19 | 255.4 | 365.21  | 356.03  | 364.86  | 384.60  | 345.05  | 365.36  | 363.52  | 11.90 | 3.3% |
| 6.62_385.1705m/z | 385.1705 | 6.62 | 188.3 | 59.13   | 58.84   | 60.80   | 56.02   | 60.75   | 59.07   | 59.10   | 1.59  | 2.7% |
| 6.58_624.3344m/z | 624.3344 | 6.58 | 237.9 | 896.44  | 901.62  | 894.16  | 895.35  | 894.14  | 896.31  | 896.34  | 2.53  | 0.3% |
| 6.57_610.2844m/z | 610.2844 | 6.57 | 228.8 | 50.77   | 46.61   | 57.41   | 43.86   | 51.41   | 50.71   | 50.13   | 4.22  | 8.4% |
| 6.56_679.3016m/z | 679.3016 | 6.56 | 250.3 | 11.04   | 11.86   | 9.30    | 12.17   | 10.55   | 11.06   | 11.00   | 0.93  | 8.5% |
| 6.63_580.2355m/z | 580.2355 | 6.63 | 218.3 | 542.00  | 545.66  | 532.94  | 559.33  | 524.41  | 542.23  | 541.09  | 10.80 | 2.0% |

|                  |          |      |       |         |         |         |         |         |         |         |       |       |
|------------------|----------|------|-------|---------|---------|---------|---------|---------|---------|---------|-------|-------|
| 6.67_601.2970m/z | 601.2970 | 6.67 | 234.5 | 827.74  | 822.24  | 818.02  | 848.75  | 816.44  | 827.62  | 826.80  | 10.71 | 1.3%  |
| 6.66_665.3604m/z | 665.3604 | 6.66 | 246.7 | 569.36  | 570.78  | 549.00  | 598.98  | 551.39  | 569.53  | 568.17  | 16.37 | 2.9%  |
| 6.65_316.1862m/z | 316.1862 | 6.65 | 183.3 | 35.88   | 34.02   | 37.55   | 35.75   | 35.34   | 35.87   | 35.74   | 1.04  | 2.9%  |
| 6.65_594.3246m/z | 594.3246 | 6.65 | 238.4 | 1600.53 | 1578.46 | 1594.60 | 1644.64 | 1566.64 | 1600.44 | 1597.55 | 24.37 | 1.5%  |
| 6.64_502.1968m/z | 502.1968 | 6.64 | 212.4 | 319.82  | 323.41  | 311.02  | 325.23  | 320.48  | 319.68  | 319.94  | 4.47  | 1.4%  |
| 6.56_307.9499n   | 288.9320 | 6.56 | 150.4 | 165.50  | 160.82  | 164.69  | 168.32  | 166.55  | 165.35  | 165.21  | 2.28  | 1.4%  |
| 6.56_227.1396m/z | 227.1396 | 6.56 | 156.2 | 2700.05 | 2673.69 | 2675.69 | 2748.89 | 2688.21 | 2699.06 | 2697.60 | 25.10 | 0.9%  |
| 6.47_508.2362m/z | 508.2362 | 6.47 | 215.9 | 103.52  | 104.33  | 104.61  | 101.26  | 104.09  | 103.50  | 103.55  | 1.10  | 1.1%  |
| 6.46_636.2968m/z | 636.2968 | 6.46 | 235.8 | 550.26  | 553.16  | 538.62  | 564.95  | 542.16  | 550.28  | 549.91  | 8.41  | 1.5%  |
| 6.45_794.3688m/z | 794.3688 | 6.45 | 262.1 | 1896.10 | 1921.19 | 1865.84 | 1919.35 | 1877.77 | 1896.29 | 1896.09 | 20.09 | 1.1%  |
| 6.48_644.2940m/z | 644.2940 | 6.48 | 239.4 | 7.07    | 6.40    | 8.13    | 5.86    | 7.28    | 7.06    | 6.97    | 0.71  | 10.2% |
| 6.48_454.2595m/z | 454.2595 | 6.48 | 209.8 | 15.76   | 15.28   | 16.81   | 15.05   | 15.44   | 15.76   | 15.68   | 0.56  | 3.6%  |
| 6.49_296.0996m/z | 296.0996 | 6.49 | 165.1 | 326.68  | 334.37  | 314.59  | 337.95  | 318.43  | 326.84  | 326.48  | 8.16  | 2.5%  |
| 6.55_385.1694m/z | 385.1694 | 6.55 | 188.3 | 22.51   | 23.27   | 21.85   | 22.69   | 22.17   | 22.52   | 22.50   | 0.44  | 1.9%  |
| 6.55_272.1232m/z | 272.1232 | 6.55 | 162.6 | 99.60   | 102.16  | 99.00   | 95.58   | 101.85  | 99.55   | 99.62   | 2.17  | 2.2%  |
| 6.55_565.2618m/z | 565.2618 | 6.55 | 224.0 | 1670.91 | 1663.39 | 1654.86 | 1706.98 | 1648.62 | 1670.70 | 1669.24 | 18.68 | 1.1%  |
| 6.54_610.3189m/z | 610.3189 | 6.54 | 226.9 | 3063.99 | 3077.18 | 2997.58 | 3135.66 | 3037.51 | 3063.58 | 3062.58 | 41.65 | 1.4%  |
| 6.53_626.3500m/z | 626.3500 | 6.53 | 245.4 | 46.26   | 48.15   | 43.36   | 46.46   | 47.46   | 46.24   | 46.32   | 1.50  | 3.2%  |
| 6.53_225.0873m/z | 225.0873 | 6.53 | 151.3 | 1677.58 | 1667.34 | 1676.68 | 1688.72 | 1671.72 | 1677.04 | 1676.51 | 6.55  | 0.4%  |
| 6.52_555.3128m/z | 555.3128 | 6.52 | 229.7 | 772.77  | 769.09  | 755.44  | 794.60  | 768.14  | 772.52  | 772.10  | 11.61 | 1.5%  |
| 6.50_681.3563m/z | 681.3563 | 6.50 | 248.3 | 111.44  | 116.05  | 105.11  | 114.00  | 110.74  | 111.48  | 111.47  | 3.37  | 3.0%  |
| 6.50_610.2816m/z | 610.2816 | 6.50 | 232.5 | 87.17   | 93.24   | 82.27   | 86.42   | 86.55   | 87.28   | 87.16   | 3.21  | 3.7%  |
| 6.19_585.2676m/z | 585.2676 | 6.19 | 238.5 | 305.96  | 315.58  | 303.05  | 295.59  | 310.33  | 305.96  | 306.08  | 6.16  | 2.0%  |
| 5.94_328.1500m/z | 328.1500 | 5.94 | 179.5 | 476.02  | 464.01  | 480.86  | 483.47  | 470.86  | 475.84  | 475.18  | 6.40  | 1.3%  |
| 5.93_795.5581m/z | 795.5581 | 5.93 | 297.5 | 2.18    | 2.02    | 2.43    | 0.00    | 0.00    | 2.19    | 1.47    | 1.05  | 71.2% |
| 5.93_465.1448m/z | 465.1448 | 5.93 | 216.8 | 1117.73 | 1089.84 | 1139.07 | 1129.47 | 1096.91 | 1117.51 | 1115.09 | 17.14 | 1.5%  |
| 5.92_749.4437m/z | 749.4437 | 5.92 | 278.3 | 3429.28 | 3407.37 | 3422.86 | 3454.72 | 3421.30 | 3428.09 | 3427.27 | 14.20 | 0.4%  |
| 5.91_298.1403m/z | 298.1403 | 5.91 | 171.9 | 2286.20 | 2259.40 | 2314.03 | 2282.27 | 2275.92 | 2285.45 | 2283.88 | 16.24 | 0.7%  |
| 5.90_440.2505m/z | 440.2505 | 5.90 | 204.7 | 1383.03 | 1359.15 | 1399.45 | 1379.40 | 1387.87 | 1382.18 | 1381.85 | 12.03 | 0.9%  |

|                  |          |      |       |          |          |          |          |          |          |          |       |       |
|------------------|----------|------|-------|----------|----------|----------|----------|----------|----------|----------|-------|-------|
| 5.95_491.2145m/z | 491.2145 | 5.95 | 209.0 | 4049.29  | 4010.03  | 4072.87  | 4062.25  | 4033.26  | 4047.88  | 4045.93  | 20.23 | 0.5%  |
| 5.95_451.2371m/z | 451.2371 | 5.95 | 166.3 | 1221.09  | 1207.56  | 1214.30  | 1256.84  | 1192.16  | 1221.10  | 1218.84  | 19.64 | 1.6%  |
| 5.95_263.1386m/z | 263.1386 | 5.95 | 164.7 | 42.71    | 43.21    | 42.75    | 42.90    | 40.73    | 42.73    | 42.50    | 0.81  | 1.9%  |
| 5.98_332.1224m/z | 332.1224 | 5.98 | 179.3 | 20.48    | 20.12    | 18.73    | 23.93    | 16.24    | 20.54    | 20.01    | 2.30  | 11.5% |
| 6.02_490.2617n   | 525.2311 | 6.02 | 212.0 | 6079.73  | 6061.94  | 6049.93  | 6169.24  | 6006.56  | 6079.06  | 6074.41  | 48.99 | 0.8%  |
| 5.98_711.3311m/z | 711.3311 | 5.98 | 253.6 | 3168.70  | 3143.09  | 3179.92  | 3211.48  | 3114.68  | 3168.55  | 3164.40  | 30.05 | 0.9%  |
| 5.99_407.7344n   | 406.7271 | 5.99 | 158.8 | 1557.53  | 1536.73  | 1590.43  | 1535.23  | 1558.63  | 1556.83  | 1555.90  | 18.25 | 1.2%  |
| 5.97_451.7426n   | 450.7353 | 5.97 | 166.3 | 7231.44  | 7169.63  | 7348.77  | 7174.21  | 7187.04  | 7229.69  | 7223.46  | 61.18 | 0.8%  |
| 5.96_633.3173m/z | 633.3173 | 5.96 | 247.2 | 1711.05  | 1684.18  | 1712.49  | 1748.72  | 1681.29  | 1710.81  | 1708.09  | 22.27 | 1.3%  |
| 5.83_266.0888m/z | 266.0888 | 5.83 | 156.2 | 729.17   | 695.50   | 756.55   | 734.49   | 716.01   | 728.90   | 726.77   | 18.48 | 2.5%  |
| 5.79_357.1410m/z | 357.1410 | 5.79 | 185.6 | 2245.27  | 2150.25  | 2357.81  | 2172.80  | 2266.39  | 2243.18  | 2239.28  | 67.31 | 3.0%  |
| 5.86_530.2776m/z | 530.2776 | 5.86 | 211.9 | 790.38   | 769.71   | 802.27   | 791.55   | 792.16   | 789.83   | 789.32   | 9.72  | 1.2%  |
| 5.86_381.1772m/z | 381.1772 | 5.86 | 188.4 | 2467.56  | 2452.12  | 2476.24  | 2485.69  | 2442.59  | 2467.16  | 2465.23  | 14.34 | 0.6%  |
| 5.85_454.2549m/z | 454.2549 | 5.85 | 217.1 | 116.57   | 112.20   | 117.88   | 124.25   | 107.90   | 116.62   | 115.90   | 5.04  | 4.3%  |
| 6.13_612.2745n   | 611.2838 | 6.13 | 243.7 | 1750.86  | 1739.88  | 1764.39  | 1744.93  | 1748.30  | 1750.27  | 1749.77  | 7.51  | 0.4%  |
| 6.12_286.1400m/z | 286.1400 | 6.12 | 167.2 | 23.36    | 19.73    | 25.58    | 24.15    | 21.87    | 23.35    | 23.01    | 1.83  | 8.0%  |
| 6.12_417.2127m/z | 417.2127 | 6.12 | 192.8 | 524.83   | 514.17   | 524.40   | 538.33   | 516.84   | 524.68   | 523.87   | 7.69  | 1.5%  |
| 6.12_261.0872m/z | 261.0872 | 6.12 | 159.7 | 806.52   | 793.07   | 825.33   | 793.02   | 809.66   | 806.09   | 805.61   | 10.97 | 1.4%  |
| 6.11_765.4389m/z | 765.4389 | 6.11 | 280.0 | 4325.68  | 4310.25  | 4297.68  | 4404.60  | 4265.29  | 4325.35  | 4321.48  | 42.41 | 1.0%  |
| 6.18_274.0932m/z | 274.0932 | 6.18 | 157.5 | 10082.77 | 10011.34 | 10106.90 | 10151.16 | 10012.89 | 10080.27 | 10074.22 | 49.69 | 0.5%  |
| 6.18_479.1953m/z | 479.1953 | 6.18 | 162.4 | 229.46   | 229.74   | 227.17   | 230.70   | 229.97   | 229.38   | 229.40   | 1.09  | 0.5%  |
| 6.17_580.2344m/z | 580.2344 | 6.17 | 220.1 | 60.40    | 63.22    | 53.29    | 67.29    | 55.29    | 60.49    | 60.00    | 4.68  | 7.8%  |
| 6.16_305.1366m/z | 305.1366 | 6.16 | 140.2 | 36.35    | 35.03    | 36.91    | 38.31    | 34.13    | 36.36    | 36.18    | 1.33  | 3.7%  |
| 6.16_383.2292m/z | 383.2292 | 6.16 | 191.9 | 1072.63  | 1060.19  | 1069.91  | 1095.88  | 1055.45  | 1072.48  | 1071.09  | 12.80 | 1.2%  |
| 6.16_548.2360m/z | 548.2360 | 6.16 | 217.0 | 4016.71  | 3996.08  | 3988.60  | 4090.39  | 3969.63  | 4016.07  | 4012.91  | 38.24 | 1.0%  |
| 6.15_482.2244m/z | 482.2244 | 6.15 | 212.8 | 8.24     | 8.17     | 7.98     | 7.80     | 8.95     | 8.21     | 8.23     | 0.36  | 4.4%  |
| 6.10_521.2368m/z | 521.2368 | 6.10 | 210.2 | 41.56    | 37.20    | 46.62    | 38.77    | 40.64    | 41.53    | 41.05    | 2.94  | 7.2%  |
| 6.03_779.4533m/z | 779.4533 | 6.03 | 283.8 | 22.74    | 20.52    | 24.96    | 20.29    | 24.50    | 22.66    | 22.61    | 1.77  | 7.8%  |
| 6.03_200.0014m/z | 200.0014 | 6.03 | 133.0 | 232.46   | 225.53   | 244.10   | 219.77   | 238.03   | 232.19   | 232.01   | 7.90  | 3.4%  |

|                  |          |      |       |          |          |          |          |          |          |          |        |       |
|------------------|----------|------|-------|----------|----------|----------|----------|----------|----------|----------|--------|-------|
| 6.02_592.2955m/z | 592.2955 | 6.02 | 230.9 | 372.14   | 360.74   | 388.72   | 351.51   | 385.33   | 371.60   | 371.67   | 12.93  | 3.5%  |
| 6.02_580.2326m/z | 580.2326 | 6.02 | 225.6 | 53.03    | 43.81    | 60.69    | 46.00    | 57.66    | 52.79    | 52.33    | 5.94   | 11.4% |
| 6.05_438.1992m/z | 438.1992 | 6.05 | 195.8 | 11346.10 | 11289.12 | 11313.60 | 11497.87 | 11225.42 | 11344.28 | 11336.06 | 82.97  | 0.7%  |
| 6.08_229.1553m/z | 229.1553 | 6.08 | 159.4 | 1651.39  | 1584.46  | 1724.75  | 1614.69  | 1659.30  | 1650.12  | 1647.45  | 43.16  | 2.6%  |
| 6.07_126.9051m/z | 126.9051 | 6.07 | 103.8 | 4859.09  | 4912.56  | 4656.94  | 5086.45  | 4742.46  | 4860.34  | 4852.97  | 134.66 | 2.8%  |
| 6.07_706.4662m/z | 706.4662 | 6.07 | 280.9 | 205.51   | 207.32   | 212.47   | 194.29   | 205.62   | 205.53   | 205.12   | 5.43   | 2.6%  |
| 6.07_559.2154m/z | 559.2154 | 6.07 | 218.6 | 3658.07  | 3640.86  | 3649.45  | 3716.28  | 3600.81  | 3657.86  | 3653.89  | 33.99  | 0.9%  |
| 6.05_521.2352m/z | 521.2352 | 6.05 | 213.8 | 43.47    | 41.90    | 43.24    | 42.96    | 45.27    | 43.38    | 43.37    | 1.00   | 2.3%  |
| 7.25_810.3943m/z | 810.3943 | 7.25 | 263.8 | 28.96    | 30.64    | 27.79    | 27.22    | 29.96    | 28.96    | 28.92    | 1.17   | 4.0%  |
| 7.21_551.2812m/z | 551.2812 | 7.21 | 231.7 | 130.04   | 126.58   | 127.65   | 144.45   | 116.28   | 130.13   | 129.19   | 8.27   | 6.4%  |
| 7.20_341.1818m/z | 341.1818 | 7.20 | 179.1 | 395.28   | 404.59   | 340.32   | 424.78   | 394.39   | 395.18   | 392.42   | 25.59  | 6.5%  |
| 7.28_869.4356m/z | 869.4356 | 7.28 | 284.6 | 1783.13  | 1757.69  | 1792.39  | 1823.50  | 1735.75  | 1783.24  | 1779.28  | 27.44  | 1.5%  |
| 7.28_610.3203m/z | 610.3203 | 7.28 | 234.4 | 5644.91  | 5603.42  | 5595.04  | 5801.32  | 5529.06  | 5644.92  | 5636.44  | 83.33  | 1.5%  |
| 7.27_341.1823m/z | 341.1823 | 7.27 | 179.1 | 1176.01  | 1167.68  | 1188.57  | 1195.52  | 1131.58  | 1176.41  | 1172.63  | 20.47  | 1.7%  |
| 7.26_486.1661m/z | 486.1661 | 7.26 | 205.5 | 96.50    | 93.41    | 98.78    | 98.31    | 93.28    | 96.50    | 96.13    | 2.15   | 2.2%  |
| 7.26_569.2916m/z | 569.2916 | 7.26 | 223.9 | 547.03   | 538.48   | 529.75   | 589.07   | 513.51   | 547.33   | 544.19   | 23.15  | 4.3%  |
| 7.14_620.2661m/z | 620.2661 | 7.14 | 228.6 | 513.97   | 506.68   | 517.57   | 523.06   | 502.70   | 513.96   | 512.99   | 6.71   | 1.3%  |
| 7.14_277.1191m/z | 277.1191 | 7.14 | 164.1 | 2414.86  | 2385.64  | 2284.81  | 2562.73  | 2377.19  | 2414.28  | 2406.59  | 82.30  | 3.4%  |
| 7.14_424.2190m/z | 424.2190 | 7.14 | 201.5 | 124.03   | 120.37   | 123.03   | 124.23   | 126.86   | 123.88   | 123.73   | 1.91   | 1.5%  |
| 7.14_355.1973m/z | 355.1973 | 7.14 | 185.6 | 581.22   | 557.35   | 582.26   | 607.61   | 563.88   | 581.13   | 578.91   | 16.00  | 2.8%  |
| 7.12_682.3434m/z | 682.3434 | 7.12 | 246.4 | 41.17    | 43.52    | 40.70    | 35.45    | 44.55    | 41.13    | 41.08    | 2.88   | 7.0%  |
| 7.10_810.3979m/z | 810.3979 | 7.10 | 271.6 | 373.28   | 373.49   | 353.25   | 392.81   | 368.98   | 373.21   | 372.50   | 11.53  | 3.1%  |
| 7.10_584.3047m/z | 584.3047 | 7.10 | 225.5 | 5278.23  | 5142.78  | 5213.30  | 5554.99  | 5089.58  | 5278.57  | 5259.58  | 148.69 | 2.8%  |
| 7.19_199.0721m/z | 199.0721 | 7.19 | 146.1 | 757.39   | 752.08   | 765.39   | 746.89   | 763.69   | 757.01   | 757.08   | 6.35   | 0.8%  |
| 7.15_455.1243m/z | 455.1243 | 7.15 | 199.0 | 1271.86  | 1273.43  | 1269.94  | 1278.80  | 1260.83  | 1271.73  | 1271.10  | 5.36   | 0.4%  |
| 7.30_282.1086m/z | 282.1086 | 7.30 | 163.9 | 752.99   | 758.95   | 752.86   | 735.79   | 767.02   | 752.52   | 753.36   | 9.38   | 1.2%  |
| 7.41_497.2001m/z | 497.2001 | 7.41 | 207.1 | 2419.54  | 2442.53  | 2392.84  | 2460.62  | 2367.90  | 2420.11  | 2417.26  | 30.46  | 1.3%  |
| 7.43_610.2641n   | 609.2625 | 7.43 | 230.7 | 577.82   | 589.00   | 570.89   | 577.11   | 573.18   | 577.91   | 577.65   | 5.70   | 1.0%  |
| 7.40_598.7630m/z | 598.7630 | 7.40 | 184.2 | 1558.88  | 1553.45  | 1542.82  | 1603.98  | 1520.50  | 1559.05  | 1556.45  | 25.03  | 1.6%  |

|                  |          |      |       |         |         |         |         |         |         |         |       |      |
|------------------|----------|------|-------|---------|---------|---------|---------|---------|---------|---------|-------|------|
| 7.39_585.2896m/z | 585.2896 | 7.39 | 231.1 | 251.35  | 251.90  | 245.08  | 257.45  | 250.33  | 251.28  | 251.23  | 3.60  | 1.4% |
| 7.45_229.0825m/z | 229.0825 | 7.45 | 151.1 | 507.62  | 516.57  | 501.43  | 502.69  | 511.23  | 507.51  | 507.84  | 5.09  | 1.0% |
| 7.45_945.4313m/z | 945.4313 | 7.45 | 291.6 | 3399.99 | 3428.10 | 3348.04 | 3460.93 | 3349.19 | 3400.25 | 3397.75 | 40.32 | 1.2% |
| 7.32_742.1671m/z | 742.1671 | 7.32 | 249.4 | 120.78  | 117.91  | 128.33  | 111.75  | 121.56  | 120.70  | 120.17  | 4.92  | 4.1% |
| 7.31_456.2453m/z | 456.2453 | 7.31 | 206.1 | 1822.86 | 1795.07 | 1832.76 | 1861.99 | 1779.67 | 1822.83 | 1819.20 | 26.41 | 1.5% |
| 7.35_636.3674n   | 671.3368 | 7.35 | 239.0 | 3695.03 | 3690.85 | 3598.06 | 3870.50 | 3573.33 | 3696.06 | 3687.30 | 95.45 | 2.6% |
| 7.30_284.1609m/z | 284.1609 | 7.30 | 170.7 | 1107.35 | 1089.68 | 1111.89 | 1136.19 | 1077.16 | 1107.40 | 1104.95 | 18.44 | 1.7% |
| 7.33_329.1820m/z | 329.1820 | 7.33 | 176.0 | 929.53  | 913.55  | 925.68  | 960.14  | 906.25  | 929.51  | 927.44  | 16.95 | 1.8% |
| 7.36_741.3782m/z | 741.3782 | 7.36 | 258.9 | 3753.70 | 3742.49 | 3719.65 | 3831.50 | 3699.31 | 3753.45 | 3750.02 | 41.26 | 1.1% |
| 7.35_533.2330m/z | 533.2330 | 7.35 | 215.4 | 215.00  | 214.55  | 205.28  | 231.09  | 204.04  | 215.10  | 214.18  | 8.85  | 4.1% |
| 7.35_399.2152m/z | 399.2152 | 7.35 | 196.8 | 365.18  | 363.15  | 354.85  | 387.26  | 348.31  | 365.34  | 364.02  | 12.07 | 3.3% |
| 7.35_318.6302n   | 636.2552 | 7.35 | 247.1 | 4340.95 | 4420.38 | 4246.26 | 4386.20 | 4310.64 | 4341.26 | 4340.95 | 55.14 | 1.3% |
| 7.33_438.1975m/z | 438.1975 | 7.33 | 202.9 | 214.33  | 211.15  | 214.53  | 224.72  | 202.61  | 214.42  | 213.63  | 6.49  | 3.0% |
| 6.85_454.1925m/z | 454.1925 | 6.85 | 202.6 | 400.22  | 397.79  | 385.21  | 419.82  | 393.31  | 400.17  | 399.42  | 10.48 | 2.6% |
| 6.84_452.7319n   | 451.7246 | 6.84 | 167.9 | 1704.44 | 1736.68 | 1655.05 | 1755.23 | 1663.32 | 1705.19 | 1703.32 | 35.92 | 2.1% |
| 6.81_559.2140m/z | 559.2140 | 6.81 | 216.8 | 1249.39 | 1252.16 | 1241.90 | 1264.34 | 1234.24 | 1249.35 | 1248.56 | 9.24  | 0.7% |
| 6.81_438.2351m/z | 438.2351 | 6.81 | 206.5 | 3062.39 | 3027.35 | 3049.68 | 3125.17 | 3024.72 | 3061.73 | 3058.51 | 33.32 | 1.1% |
| 6.87_426.2351m/z | 426.2351 | 6.87 | 199.6 | 2529.86 | 2457.55 | 2518.87 | 2640.63 | 2455.04 | 2529.70 | 2521.94 | 61.70 | 2.4% |
| 6.86_286.1760m/z | 286.1760 | 6.86 | 172.3 | 589.17  | 573.84  | 587.90  | 608.36  | 578.02  | 589.04  | 587.72  | 10.93 | 1.9% |
| 6.73_282.1084m/z | 282.1084 | 6.73 | 169.0 | 389.97  | 385.22  | 389.13  | 397.33  | 385.23  | 389.88  | 389.46  | 4.05  | 1.0% |
| 6.70_385.2062m/z | 385.2062 | 6.70 | 191.8 | 94.08   | 92.13   | 92.41   | 102.65  | 84.31   | 94.18   | 93.29   | 5.35  | 5.7% |
| 6.74_905.4577n   | 886.4487 | 6.74 | 304.4 | 641.38  | 647.93  | 646.12  | 645.50  | 616.52  | 641.74  | 639.86  | 10.70 | 1.7% |
| 6.70_778.3372m/z | 778.3372 | 6.70 | 260.4 | 3810.64 | 3831.27 | 3739.47 | 3905.69 | 3749.77 | 3810.90 | 3807.96 | 55.06 | 1.4% |
| 6.69_479.2112m/z | 479.2112 | 6.69 | 207.4 | 52.98   | 50.59   | 55.00   | 53.41   | 51.96   | 52.97   | 52.82   | 1.35  | 2.5% |
| 6.69_839.9280m/z | 839.9280 | 6.69 | 216.6 | 116.46  | 115.76  | 121.96  | 109.21  | 117.55  | 116.42  | 116.23  | 3.75  | 3.2% |
| 6.69_222.0763m/z | 222.0763 | 6.69 | 151.4 | 224.54  | 222.46  | 226.72  | 222.30  | 226.19  | 224.42  | 224.44  | 1.67  | 0.7% |
| 6.76_509.2722m/z | 509.2722 | 6.76 | 217.7 | 1776.75 | 1746.56 | 1774.74 | 1825.45 | 1738.74 | 1776.59 | 1773.14 | 27.85 | 1.6% |
| 6.80_468.2068m/z | 468.2068 | 6.80 | 202.3 | 1942.45 | 1932.38 | 1918.40 | 2000.77 | 1901.19 | 1942.51 | 1939.62 | 30.92 | 1.6% |
| 6.79_525.2293m/z | 525.2293 | 6.79 | 213.8 | 1418.35 | 1423.99 | 1401.89 | 1449.77 | 1389.53 | 1418.59 | 1417.02 | 18.75 | 1.3% |

|                  |          |      |       |           |           |           |           |           |           |           |          |       |
|------------------|----------|------|-------|-----------|-----------|-----------|-----------|-----------|-----------|-----------|----------|-------|
| 6.79_612.3359m/z | 612.3359 | 6.79 | 241.8 | 5358.33   | 5318.04   | 5256.28   | 5579.98   | 5213.95   | 5358.87   | 5347.57   | 116.42   | 2.2%  |
| 6.90_411.1864m/z | 411.1864 | 6.90 | 196.5 | 756.97    | 748.13    | 755.36    | 770.77    | 748.19    | 756.80    | 756.04    | 7.56     | 1.0%  |
| 7.04_545.7732m/z | 545.7732 | 7.04 | 185.0 | 381.12    | 384.62    | 396.82    | 339.39    | 396.72    | 380.76    | 379.90    | 19.30    | 5.1%  |
| 7.04_881.4343m/z | 881.4343 | 7.04 | 282.5 | 530.08    | 523.33    | 525.00    | 548.16    | 517.44    | 530.09    | 529.02    | 9.58     | 1.8%  |
| 7.04_402.6689m/z | 402.6689 | 7.04 | 155.6 | 536.26    | 539.94    | 526.72    | 548.94    | 526.84    | 536.32    | 535.84    | 7.67     | 1.4%  |
| 7.03_291.0977m/z | 291.0977 | 7.03 | 168.7 | 416.53    | 416.15    | 419.59    | 406.15    | 424.98    | 416.20    | 416.60    | 5.61     | 1.3%  |
| 7.08_553.2956m/z | 553.2956 | 7.08 | 224.2 | 464.10    | 459.28    | 446.36    | 493.20    | 448.64    | 464.17    | 462.63    | 15.33    | 3.3%  |
| 7.01_270.1083m/z | 270.1083 | 7.01 | 161.0 | 409.02    | 402.96    | 416.16    | 393.43    | 424.02    | 408.42    | 409.00    | 9.63     | 2.4%  |
| 7.06_368.1681m/z | 368.1681 | 7.06 | 185.2 | 378.59    | 370.49    | 380.98    | 379.22    | 382.25    | 378.30    | 378.30    | 3.76     | 1.0%  |
| 7.06_677.2896m/z | 677.2896 | 7.06 | 242.7 | 2411.25   | 2430.90   | 2361.34   | 2481.02   | 2357.53   | 2411.81   | 2408.97   | 42.03    | 1.7%  |
| 6.94_213.1237m/z | 213.1237 | 6.94 | 148.6 | 106.97    | 101.86    | 111.74    | 105.03    | 107.50    | 106.88    | 106.66    | 2.95     | 2.8%  |
| 6.95_527.2821m/z | 527.2821 | 6.95 | 222.9 | 982.96    | 962.64    | 962.08    | 1031.36   | 958.71    | 982.87    | 980.10    | 24.94    | 2.5%  |
| 6.98_580.2352m/z | 580.2352 | 6.98 | 220.1 | 631.54    | 622.09    | 637.78    | 627.09    | 637.89    | 631.06    | 631.24    | 5.60     | 0.9%  |
| 6.97_357.0888m/z | 357.0888 | 6.97 | 175.2 | 1383.48   | 1390.40   | 1387.43   | 1373.06   | 1380.52   | 1383.24   | 1383.02   | 5.47     | 0.4%  |
| 6.96_802.9614m/z | 802.9614 | 6.96 | 220.7 | 325.76    | 327.81    | 323.71    | 325.01    | 327.56    | 325.63    | 325.91    | 1.42     | 0.4%  |
| 6.95_341.1456m/z | 341.1456 | 6.95 | 175.6 | 592.76    | 579.11    | 612.93    | 564.06    | 612.96    | 591.95    | 592.29    | 17.44    | 2.9%  |
| 4.82_335.6532m/z | 335.6532 | 4.82 | 160.5 | 3924.69   | 3856.05   | 4012.47   | 3882.07   | 3918.98   | 3922.88   | 3919.52   | 48.49    | 1.2%  |
| 4.82_531.3171m/z | 531.3171 | 4.82 | 230.2 | 26559.29  | 26384.82  | 25531.72  | 27737.72  | 26339.96  | 26550.19  | 26517.28  | 647.13   | 2.4%  |
| 4.81_448.2727m/z | 448.2727 | 4.81 | 219.0 | 473.25    | 487.51    | 440.79    | 484.73    | 479.71    | 473.04    | 473.17    | 15.44    | 3.3%  |
| 4.87_449.2742m/z | 449.2742 | 4.87 | 219.0 | 44.14     | 45.45     | 37.03     | 51.76     | 38.02     | 44.22     | 43.44     | 4.91     | 11.3% |
| 4.73_761.5240m/z | 761.5240 | 4.73 | 294.0 | 11772.81  | 11450.37  | 12733.44  | 10493.18  | 12011.58  | 11763.44  | 11704.14  | 669.95   | 5.7%  |
| 4.77_556.2865m/z | 556.2865 | 4.77 | 231.6 | 3806.03   | 3709.17   | 3904.27   | 3738.57   | 3853.33   | 3802.68   | 3802.34   | 65.51    | 1.7%  |
| 4.83_336.1586n   | 335.1514 | 4.83 | 160.6 | 17635.87  | 17175.64  | 18191.10  | 17263.96  | 17777.48  | 17622.48  | 17611.09  | 335.40   | 1.9%  |
| 4.89_706.4660m/z | 706.4660 | 4.89 | 278.9 | 742.24    | 729.88    | 745.99    | 743.97    | 746.45    | 741.73    | 741.71    | 5.57     | 0.8%  |
| 4.95_750.5251m/z | 750.5251 | 4.95 | 294.1 | 2275.49   | 2202.59   | 2435.68   | 2110.45   | 2283.56   | 2274.06   | 2263.64   | 97.84    | 4.3%  |
| 4.30_759.5178m/z | 759.5178 | 4.30 | 288.0 | 47585.08  | 47055.43  | 49647.86  | 45075.05  | 47876.44  | 47564.03  | 47467.31  | 1344.00  | 2.8%  |
| 4.29_773.5340m/z | 773.5340 | 4.29 | 291.8 | 145470.77 | 142061.49 | 154759.17 | 135412.67 | 145946.28 | 145400.84 | 144841.87 | 5728.89  | 4.0%  |
| 4.28_672.4726n   | 717.4697 | 4.28 | 280.7 | 1707.34   | 1686.29   | 1753.01   | 1615.99   | 1771.76   | 1705.02   | 1706.57   | 50.04    | 2.9%  |
| 4.36_710.5332n   | 745.5026 | 4.36 | 282.3 | 587600.03 | 578220.98 | 612377.26 | 562666.78 | 588869.97 | 587335.98 | 586178.50 | 14793.59 | 2.5%  |

|                  |          |      |       |            |            |            |            |            |            |            |           |       |
|------------------|----------|------|-------|------------|------------|------------|------------|------------|------------|------------|-----------|-------|
| 4.23_731.4859m/z | 731.4859 | 4.23 | 276.6 | 5816.57    | 5688.83    | 6037.20    | 5641.37    | 5834.45    | 5813.30    | 5805.29    | 126.00    | 2.2%  |
| 4.13_693.4684m/z | 693.4684 | 4.13 | 273.2 | 5875.81    | 5807.47    | 6255.04    | 5284.98    | 5978.02    | 5872.38    | 5845.62    | 289.41    | 5.0%  |
| 4.22_665.3975m/z | 665.3975 | 4.22 | 262.0 | 37.06      | 36.77      | 34.82      | 44.00      | 28.12      | 37.12      | 36.32      | 4.65      | 12.8% |
| 4.18_733.5025m/z | 733.5025 | 4.18 | 280.5 | 113125.98  | 108623.88  | 121589.14  | 104604.69  | 114672.75  | 113024.03  | 112606.74  | 5248.68   | 4.7%  |
| 4.47_483.2727m/z | 483.2727 | 4.47 | 225.6 | 8856.41    | 8551.69    | 9187.34    | 8598.23    | 9032.98    | 8847.12    | 8845.63    | 223.45    | 2.5%  |
| 4.42_764.5142m/z | 764.5142 | 4.42 | 289.9 | 887.39     | 869.87     | 884.79     | 880.82     | 914.36     | 886.29     | 887.26     | 13.45     | 1.5%  |
| 4.53_509.2886m/z | 509.2886 | 4.53 | 226.9 | 44129.07   | 41996.04   | 46686.18   | 42524.15   | 44596.76   | 44085.54   | 44002.96   | 1516.01   | 3.4%  |
| 4.50_763.5133m/z | 763.5133 | 4.50 | 286.0 | 6013.21    | 5994.30    | 6281.35    | 5504.04    | 6206.01    | 6007.85    | 6001.13    | 247.60    | 4.1%  |
| 5.56_178.0664m/z | 178.0664 | 5.56 | 129.5 | 9483.08    | 9685.63    | 9064.18    | 9883.79    | 9251.20    | 9487.19    | 9475.84    | 267.87    | 2.8%  |
| 5.58_462.2524m/z | 462.2524 | 5.58 | 216.9 | 1603.47    | 1627.37    | 1547.80    | 1672.69    | 1556.44    | 1604.56    | 1602.05    | 42.16     | 2.6%  |
| 5.57_462.2848m/z | 462.2848 | 5.57 | 202.4 | 672.37     | 669.12     | 680.71     | 667.23     | 667.68     | 672.24     | 671.56     | 4.56      | 0.7%  |
| 5.56_199.9942m/z | 199.9942 | 5.56 | 125.1 | 212.66     | 226.16     | 191.75     | 225.72     | 206.03     | 212.93     | 212.54     | 11.79     | 5.5%  |
| 5.46_185.0743m/z | 185.0743 | 5.46 | 129.1 | 32681.76   | 32553.60   | 33716.80   | 30528.80   | 33873.15   | 32641.18   | 32665.88   | 1091.06   | 3.3%  |
| 5.49_357.0793m/z | 357.0793 | 5.49 | 173.5 | 6375.12    | 6526.98    | 6036.04    | 6757.69    | 6094.25    | 6380.87    | 6361.82    | 245.72    | 3.9%  |
| 5.51_530.2778m/z | 530.2778 | 5.51 | 213.7 | 138.00     | 144.38     | 139.38     | 130.55     | 135.25     | 138.20     | 137.63     | 4.18      | 3.0%  |
| 5.49_530.2771m/z | 530.2771 | 5.49 | 213.7 | 111.69     | 114.36     | 113.13     | 109.76     | 103.98     | 111.83     | 110.79     | 3.36      | 3.0%  |
| 5.77_770.5475m/z | 770.5475 | 5.77 | 291.8 | 33.78      | 29.83      | 38.42      | 29.53      | 34.51      | 33.71      | 33.30      | 3.01      | 9.0%  |
| 5.76_466.3078m/z | 466.3078 | 5.76 | 204.1 | 7045.50    | 6883.93    | 7184.02    | 7014.37    | 7045.65    | 7041.65    | 7035.85    | 87.29     | 1.2%  |
| 5.74_592.2749m/z | 592.2749 | 5.74 | 227.2 | 413.81     | 419.53     | 416.85     | 411.74     | 405.00     | 414.05     | 413.50     | 4.53      | 1.1%  |
| 5.73_464.4977m/z | 464.4977 | 5.73 | 204.2 | 3232.71    | 3153.62    | 3318.54    | 3191.22    | 3241.33    | 3230.76    | 3228.03    | 50.48     | 1.6%  |
| 5.72_464.9111m/z | 464.9111 | 5.72 | 202.4 | 335.83     | 324.58     | 359.47     | 311.22     | 339.18     | 335.58     | 334.31     | 14.66     | 4.4%  |
| 5.72_464.6266m/z | 464.6266 | 5.72 | 204.2 | 575.12     | 562.43     | 579.24     | 577.71     | 578.55     | 574.68     | 574.62     | 5.70      | 1.0%  |
| 5.69_359.7356m/z | 359.7356 | 5.69 | 153.3 | 1839.92    | 1761.63    | 1948.96    | 1750.61    | 1868.68    | 1838.14    | 1834.66    | 66.65     | 3.6%  |
| 5.63_691.3412m/z | 691.3412 | 5.63 | 248.2 | 5081.09    | 4955.93    | 5201.39    | 5025.70    | 5106.08    | 5077.54    | 5074.62    | 74.83     | 1.5%  |
| 5.67_467.1597m/z | 467.1597 | 5.67 | 216.8 | 1372.53    | 1439.57    | 1263.49    | 1460.92    | 1311.60    | 1374.41    | 1370.42    | 68.18     | 5.0%  |
| 5.20_248.0792m/z | 248.0792 | 5.20 | 140.5 | 22338.00   | 20280.95   | 24770.95   | 20368.46   | 23014.54   | 22300.02   | 22178.82   | 1545.80   | 7.0%  |
| 5.21_691.4779n   | 690.4703 | 5.21 | 275.2 | 2132.02    | 2124.96    | 2109.50    | 2134.74    | 2162.17    | 2130.38    | 2132.29    | 15.68     | 0.7%  |
| 5.19_248.5806m/z | 248.5806 | 5.19 | 140.5 | 4384.25    | 3875.57    | 4977.52    | 3860.71    | 4551.13    | 4375.65    | 4337.47    | 387.22    | 8.9%  |
| 5.18_514.2843m/z | 514.2843 | 5.18 | 210.4 | 1368561.17 | 1236501.17 | 1536540.94 | 1199031.93 | 1432121.09 | 1365378.35 | 1356355.78 | 113690.64 | 8.4%  |

|                  |          |      |       |          |          |          |          |          |          |          |        |       |
|------------------|----------|------|-------|----------|----------|----------|----------|----------|----------|----------|--------|-------|
| 5.10_702.4710m/z | 702.4710 | 5.10 | 277.0 | 6129.19  | 6261.29  | 5939.08  | 6209.89  | 6115.83  | 6129.35  | 6130.77  | 100.22 | 1.6%  |
| 5.14_652.3928m/z | 652.3928 | 5.14 | 268.0 | 1823.03  | 1766.85  | 1856.54  | 1831.50  | 1819.81  | 1821.98  | 1819.95  | 26.79  | 1.5%  |
| 5.12_255.0860m/z | 255.0860 | 5.12 | 141.8 | 1224.74  | 1106.66  | 1367.13  | 1108.76  | 1267.20  | 1222.72  | 1216.20  | 90.41  | 7.4%  |
| 5.46_371.1565m/z | 371.1565 | 5.46 | 190.4 | 10991.34 | 10921.79 | 11485.84 | 10048.12 | 11414.28 | 10977.22 | 10973.10 | 468.35 | 4.3%  |
| 5.78_468.2730m/z | 468.2730 | 5.78 | 222.2 | 5114.27  | 5058.88  | 5170.76  | 5068.69  | 5144.71  | 5111.42  | 5111.46  | 39.21  | 0.8%  |
| 5.30_498.2905m/z | 498.2905 | 5.30 | 208.9 | 27.80    | 26.45    | 30.16    | 26.04    | 27.65    | 0.00     | 23.02    | 10.38  | 45.1% |
