# Supplementary figures and images for: Choosing an Optimal Sample Preparation in Caulobacter crescentus for Untargeted Metabolomics Approaches
Source: MDPI journal article supplement (doi:10.3390/metabo9100193), 2019-09-20

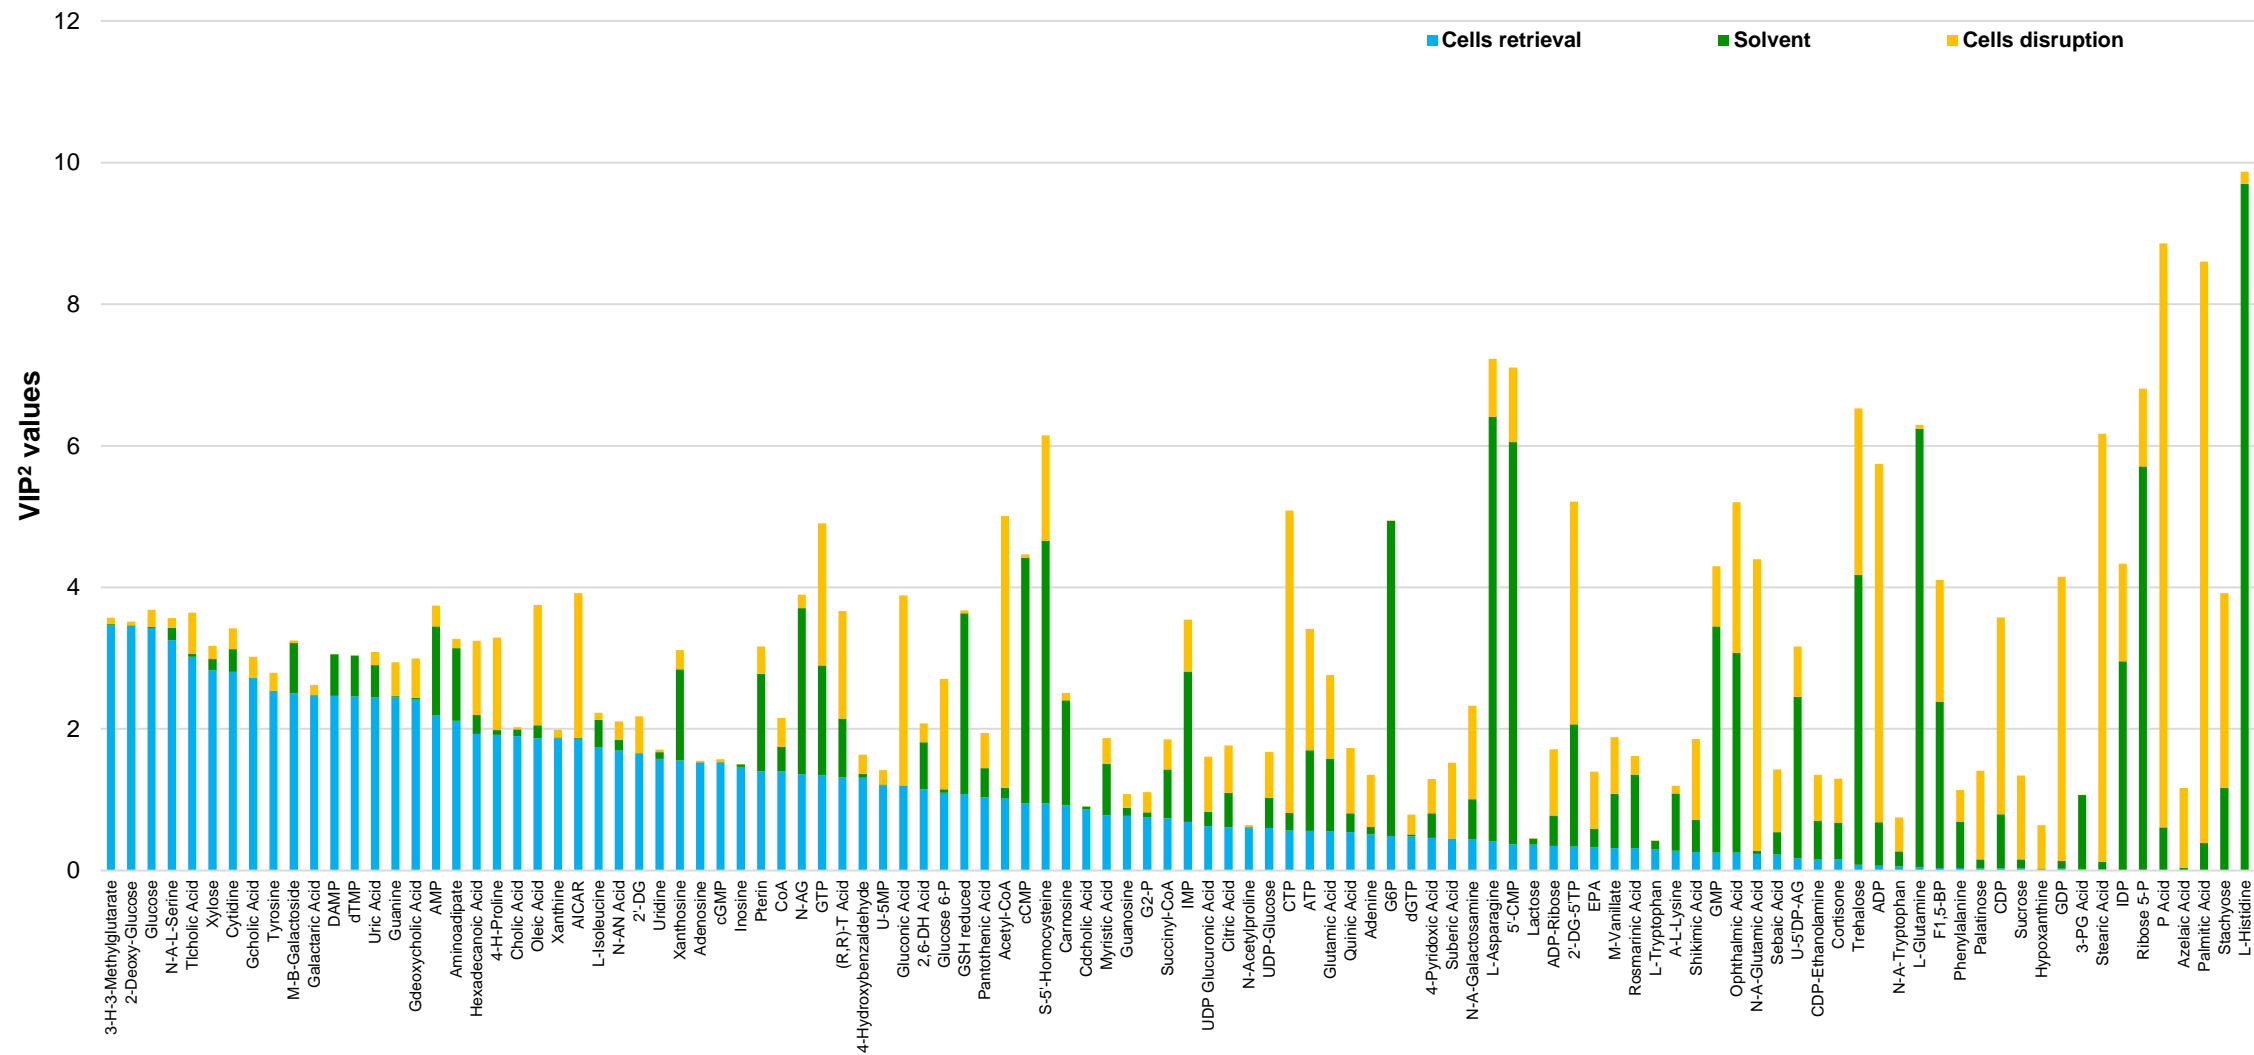

Supplement: s1 [file s1]

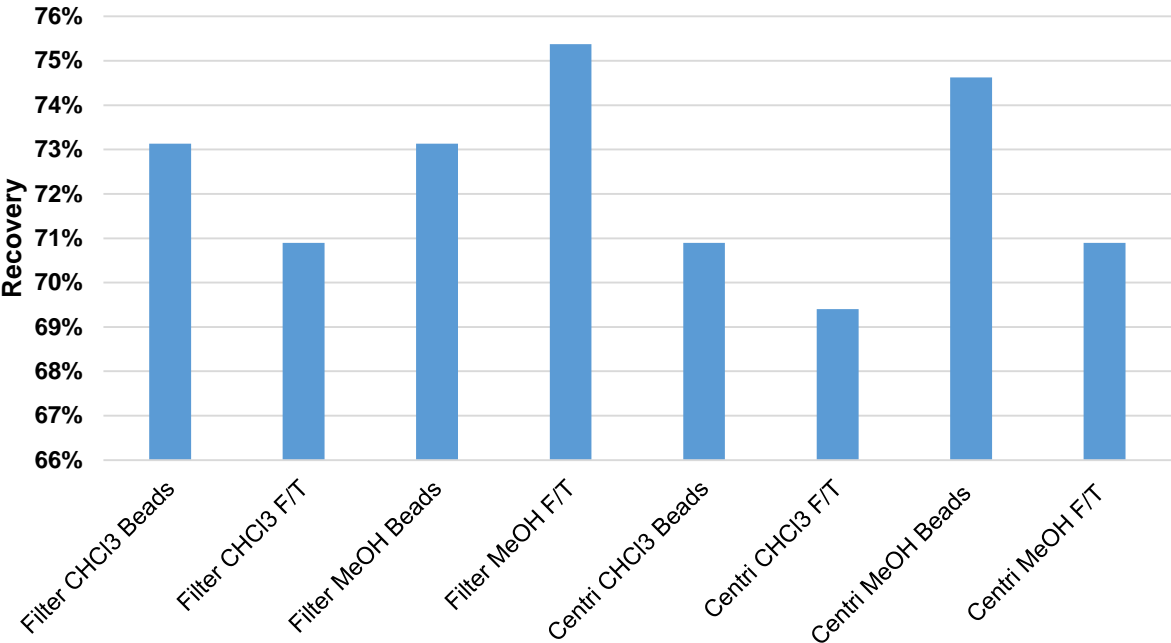

Supplement: s1 [file s1]

**A**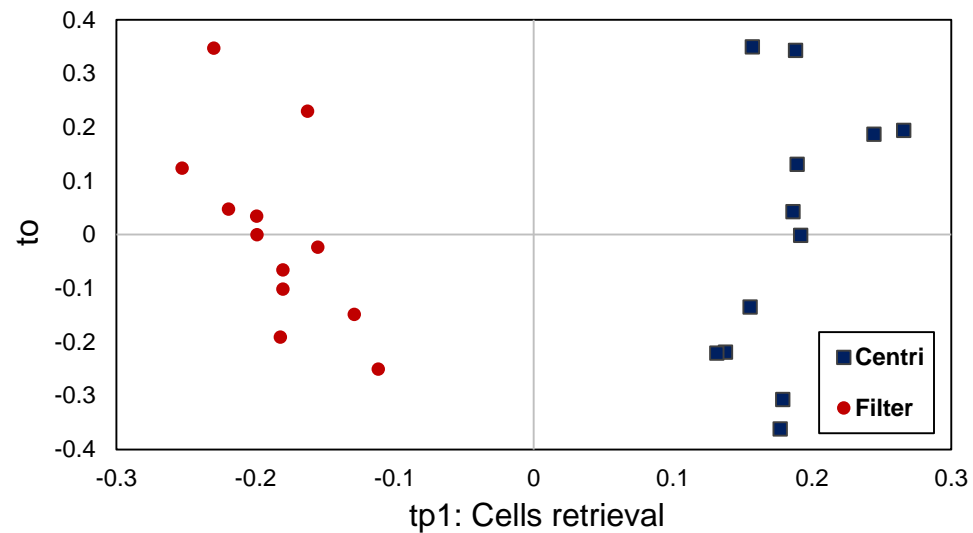**B**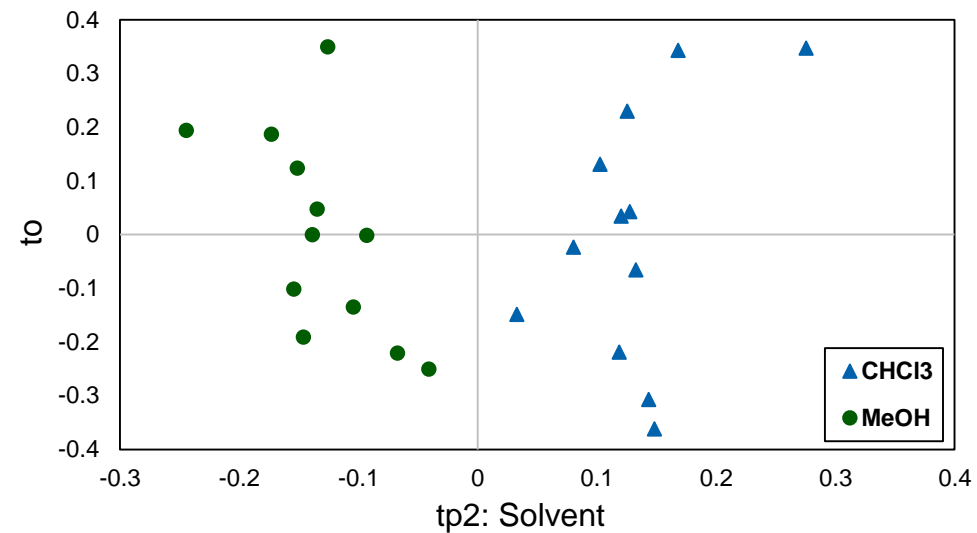**C**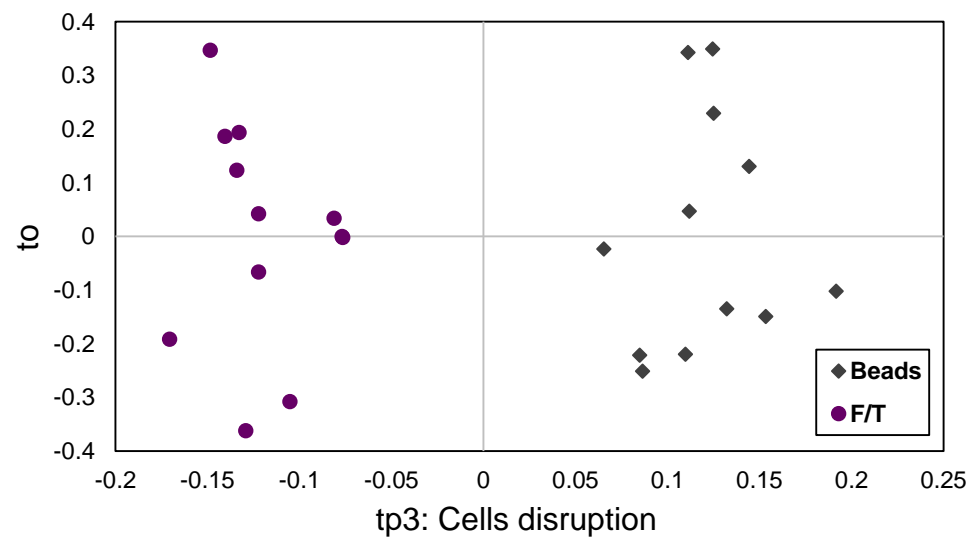

Supplement: s1 [file s1]

A

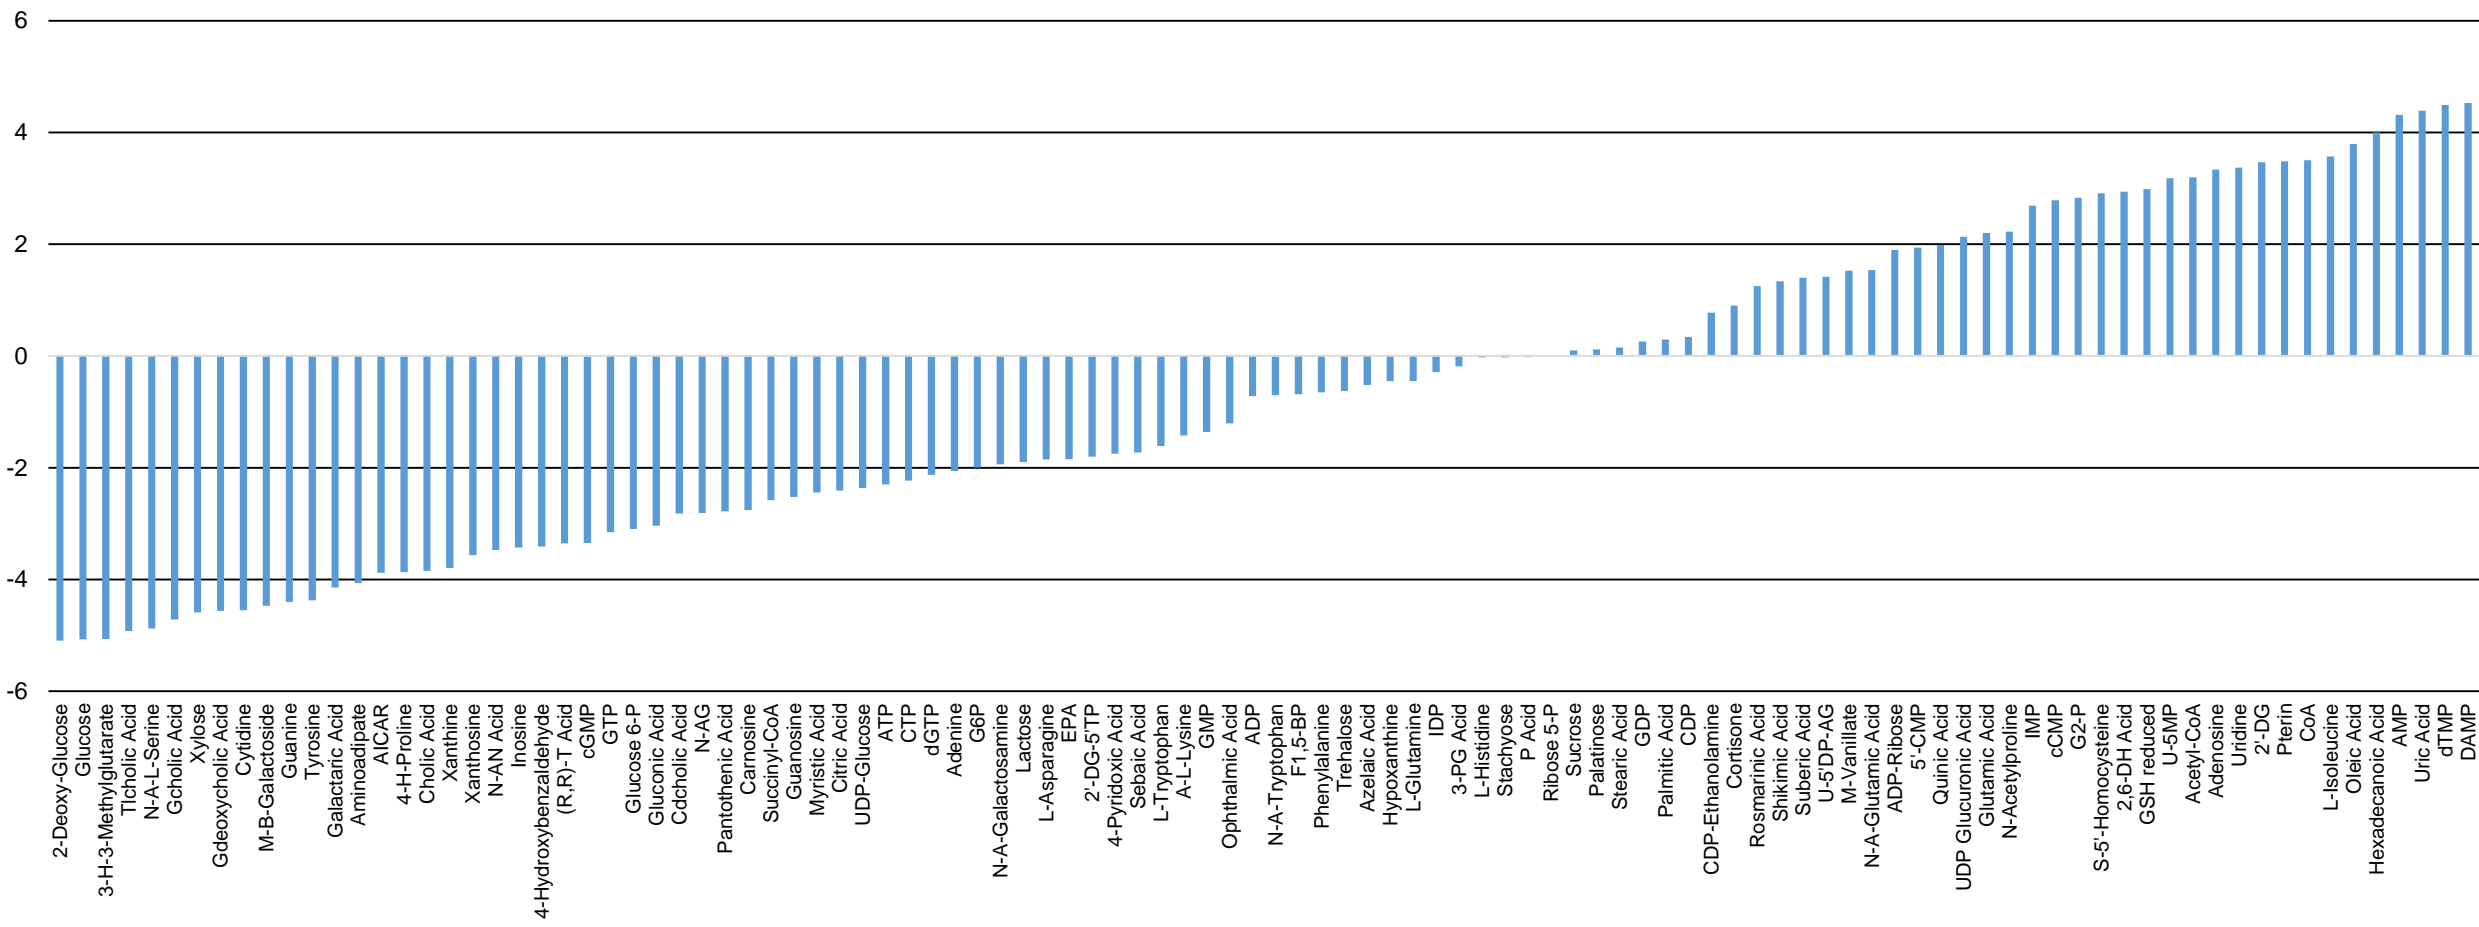

**B**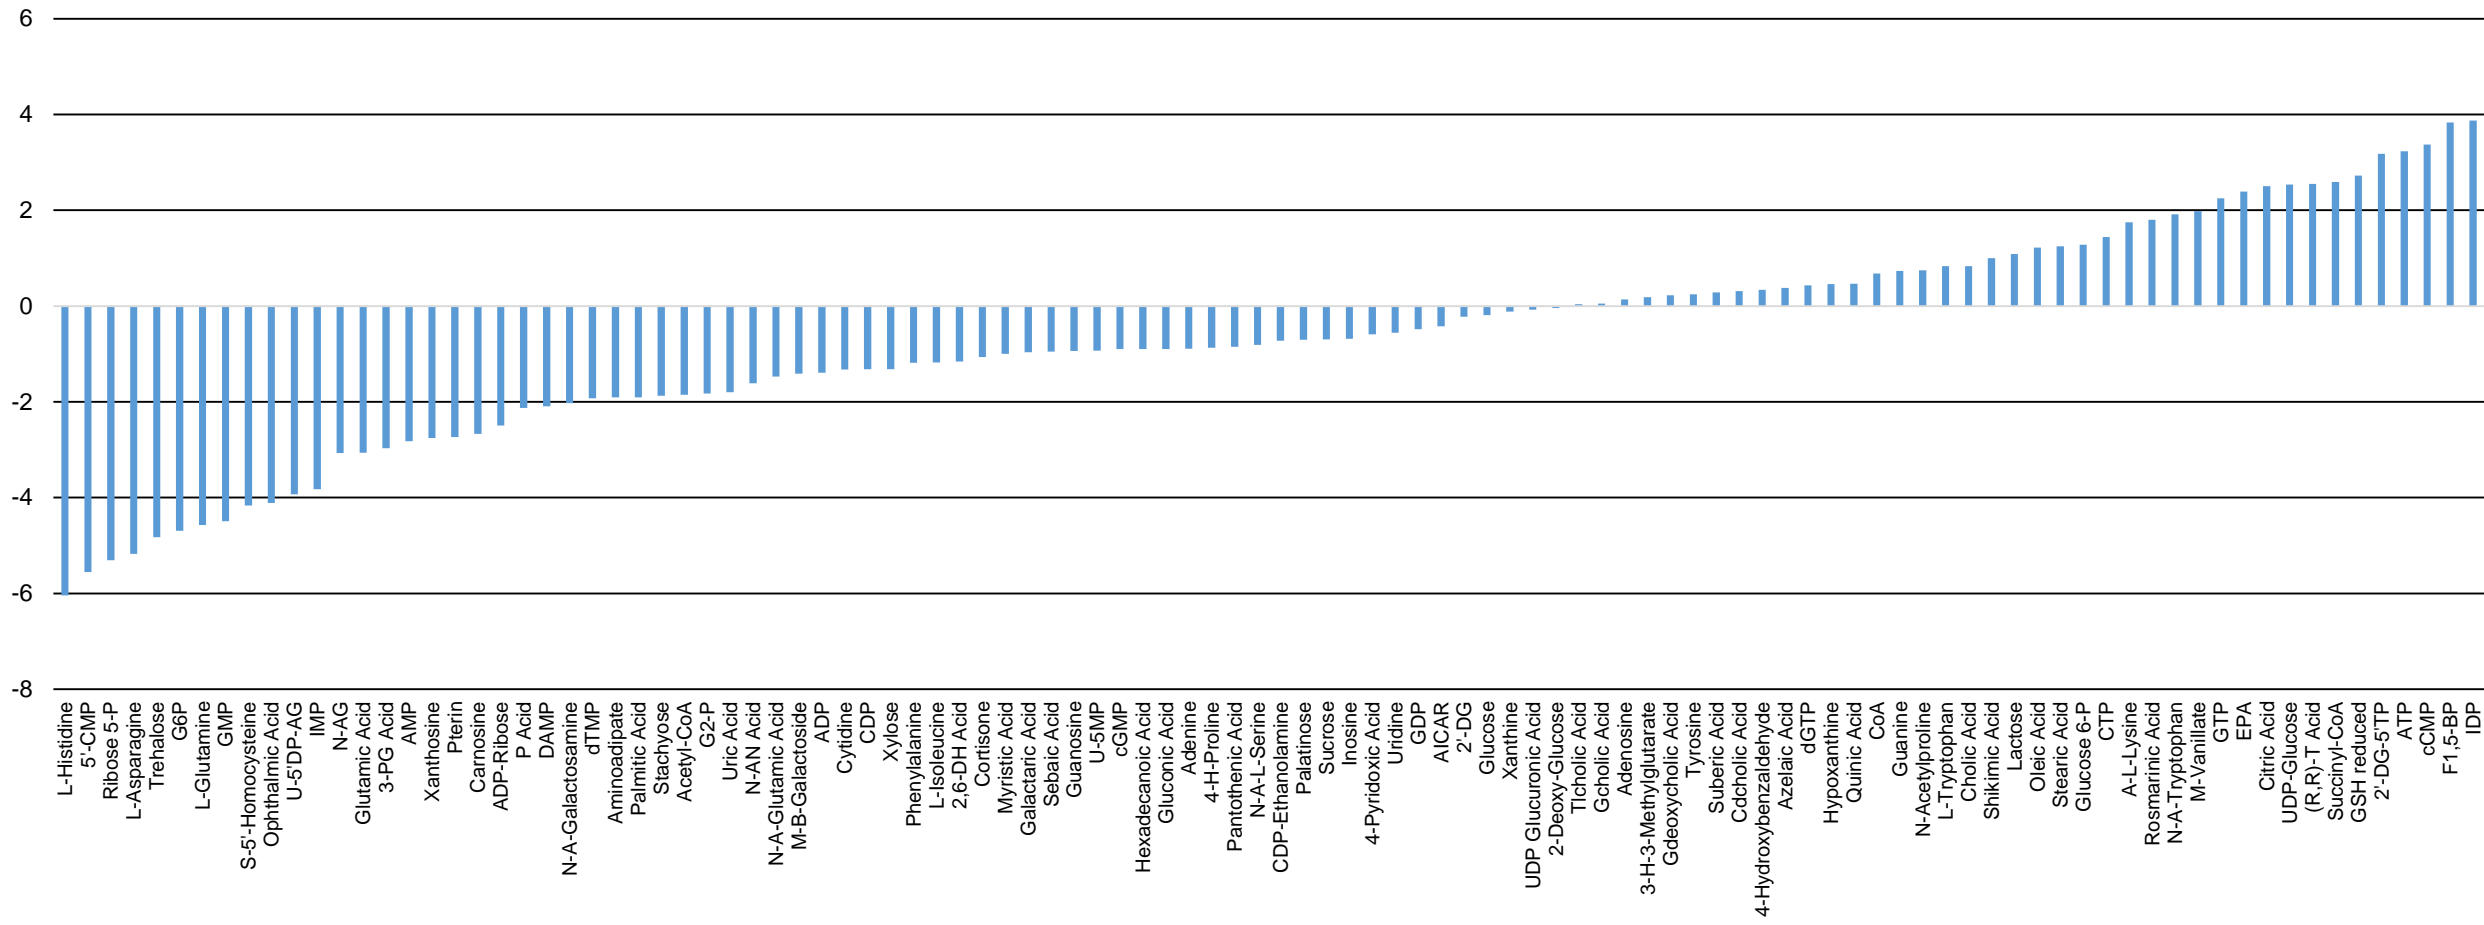

C

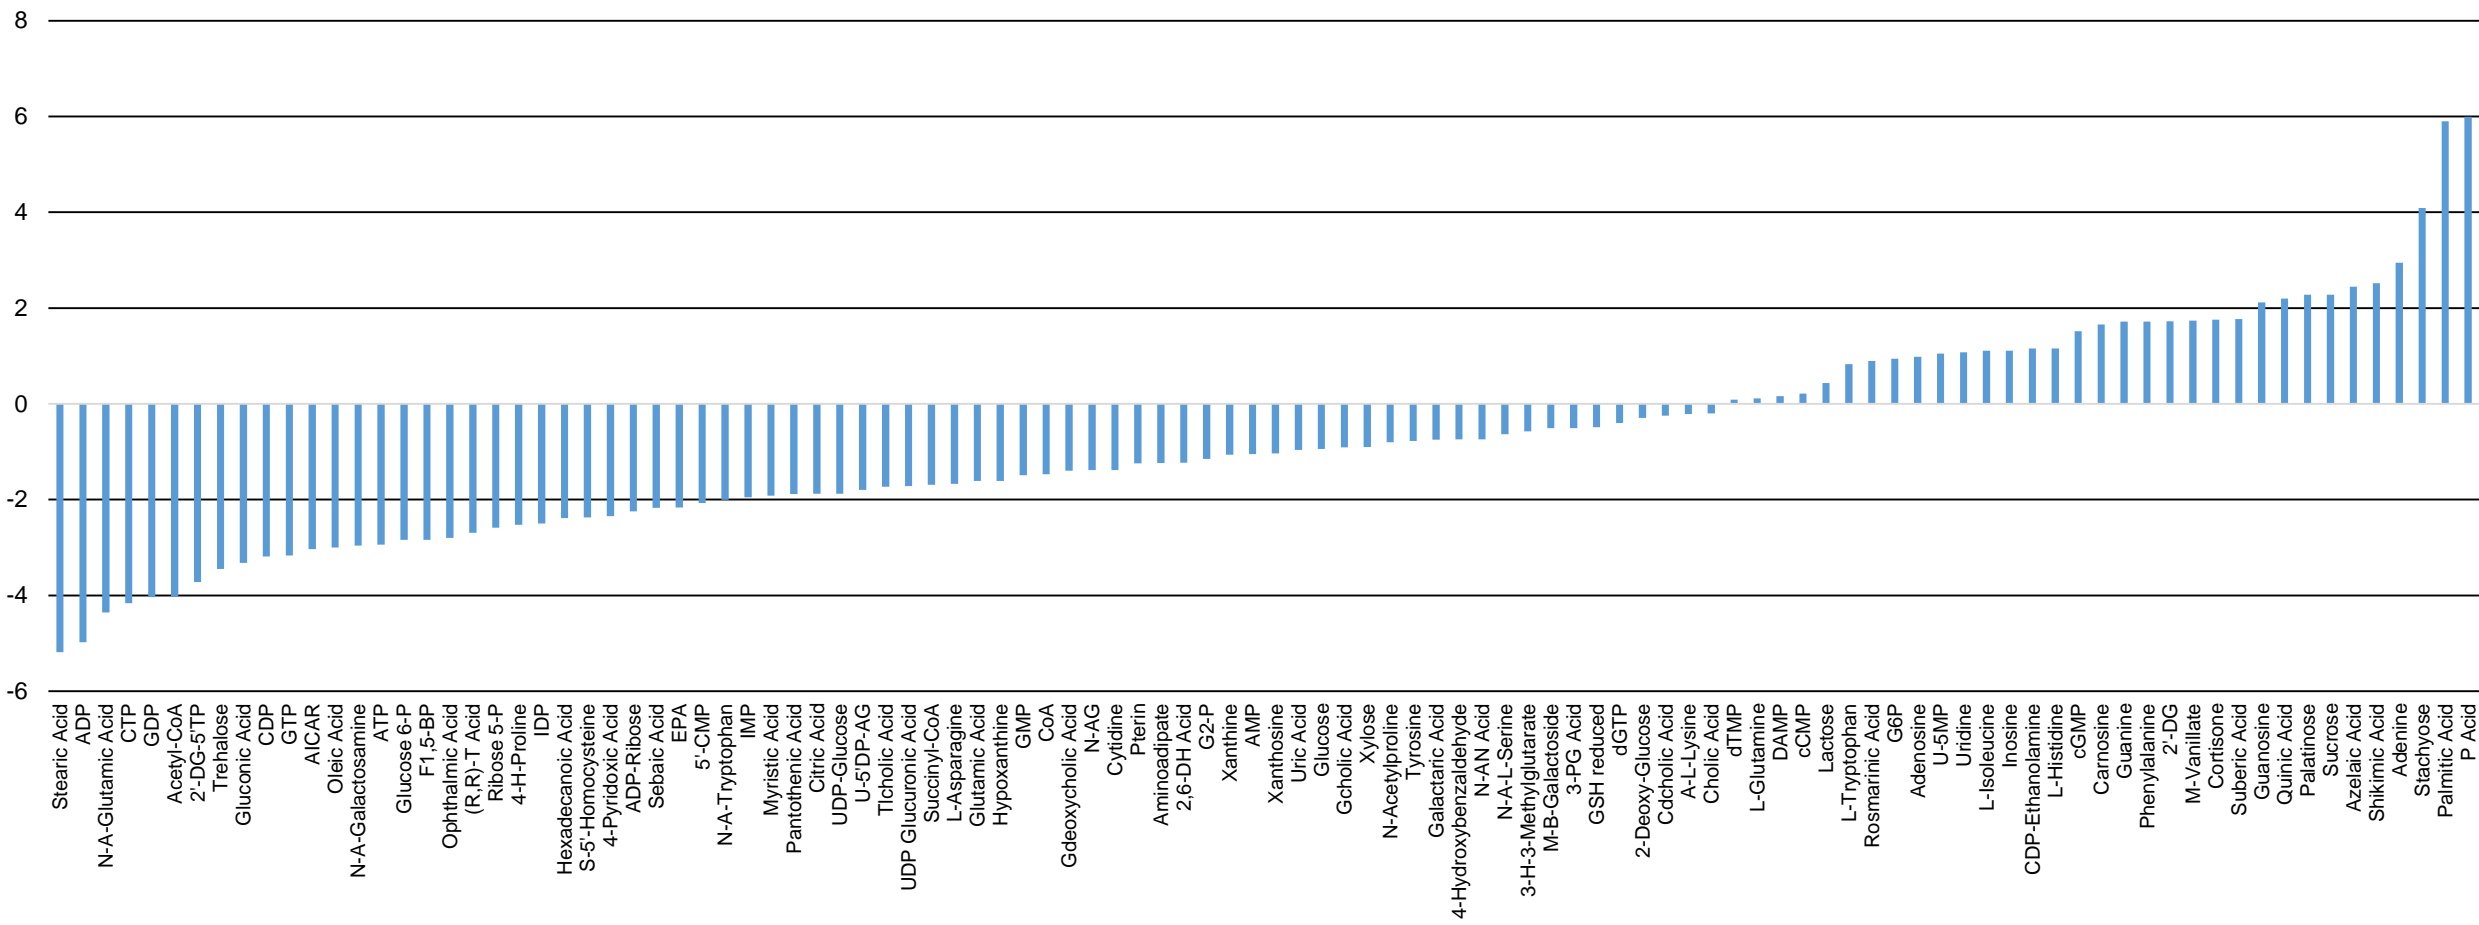

Supplement: s1 [file s1]
